# Supplementary material for: Structure and evolution of barley powdery mildew effector candidates
Source: PubMed Central journal article supplement (PMC3582587; doi:10.1186/1471-2164-13-694), 2012-12-11

# CSEP family 1 (continued).

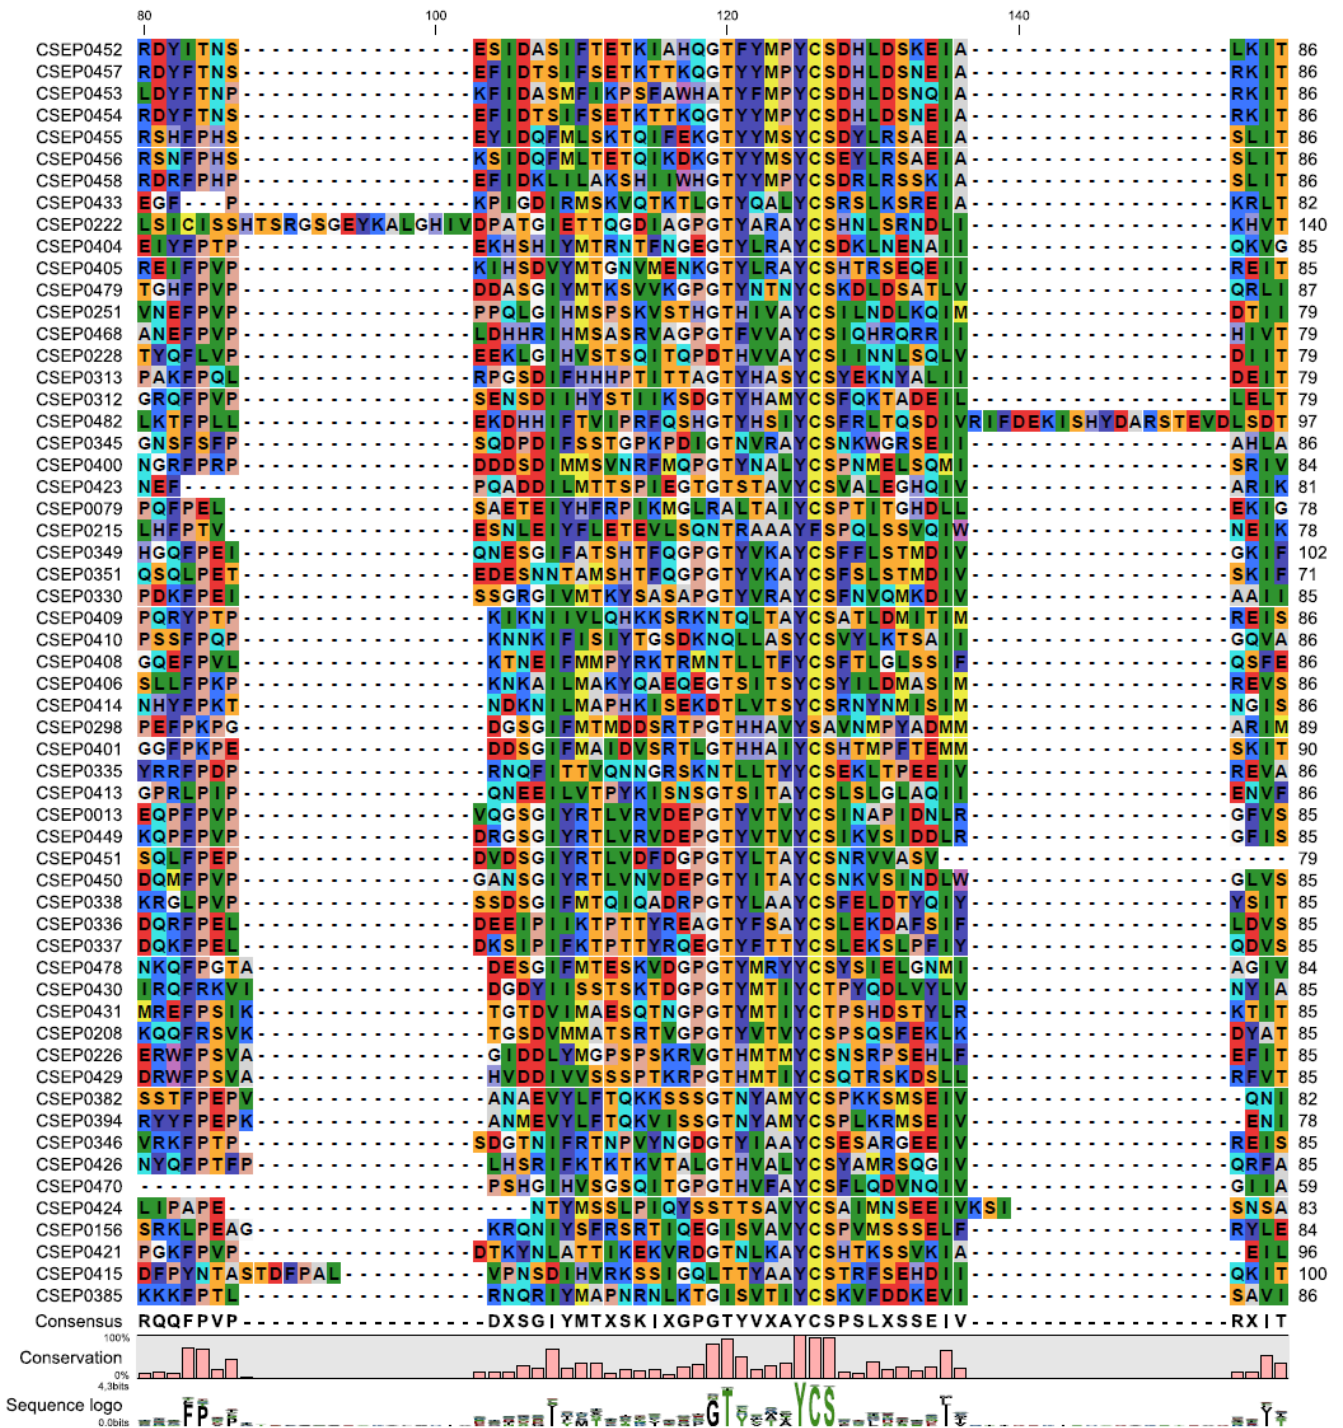

# CSEP family 1 (continued).

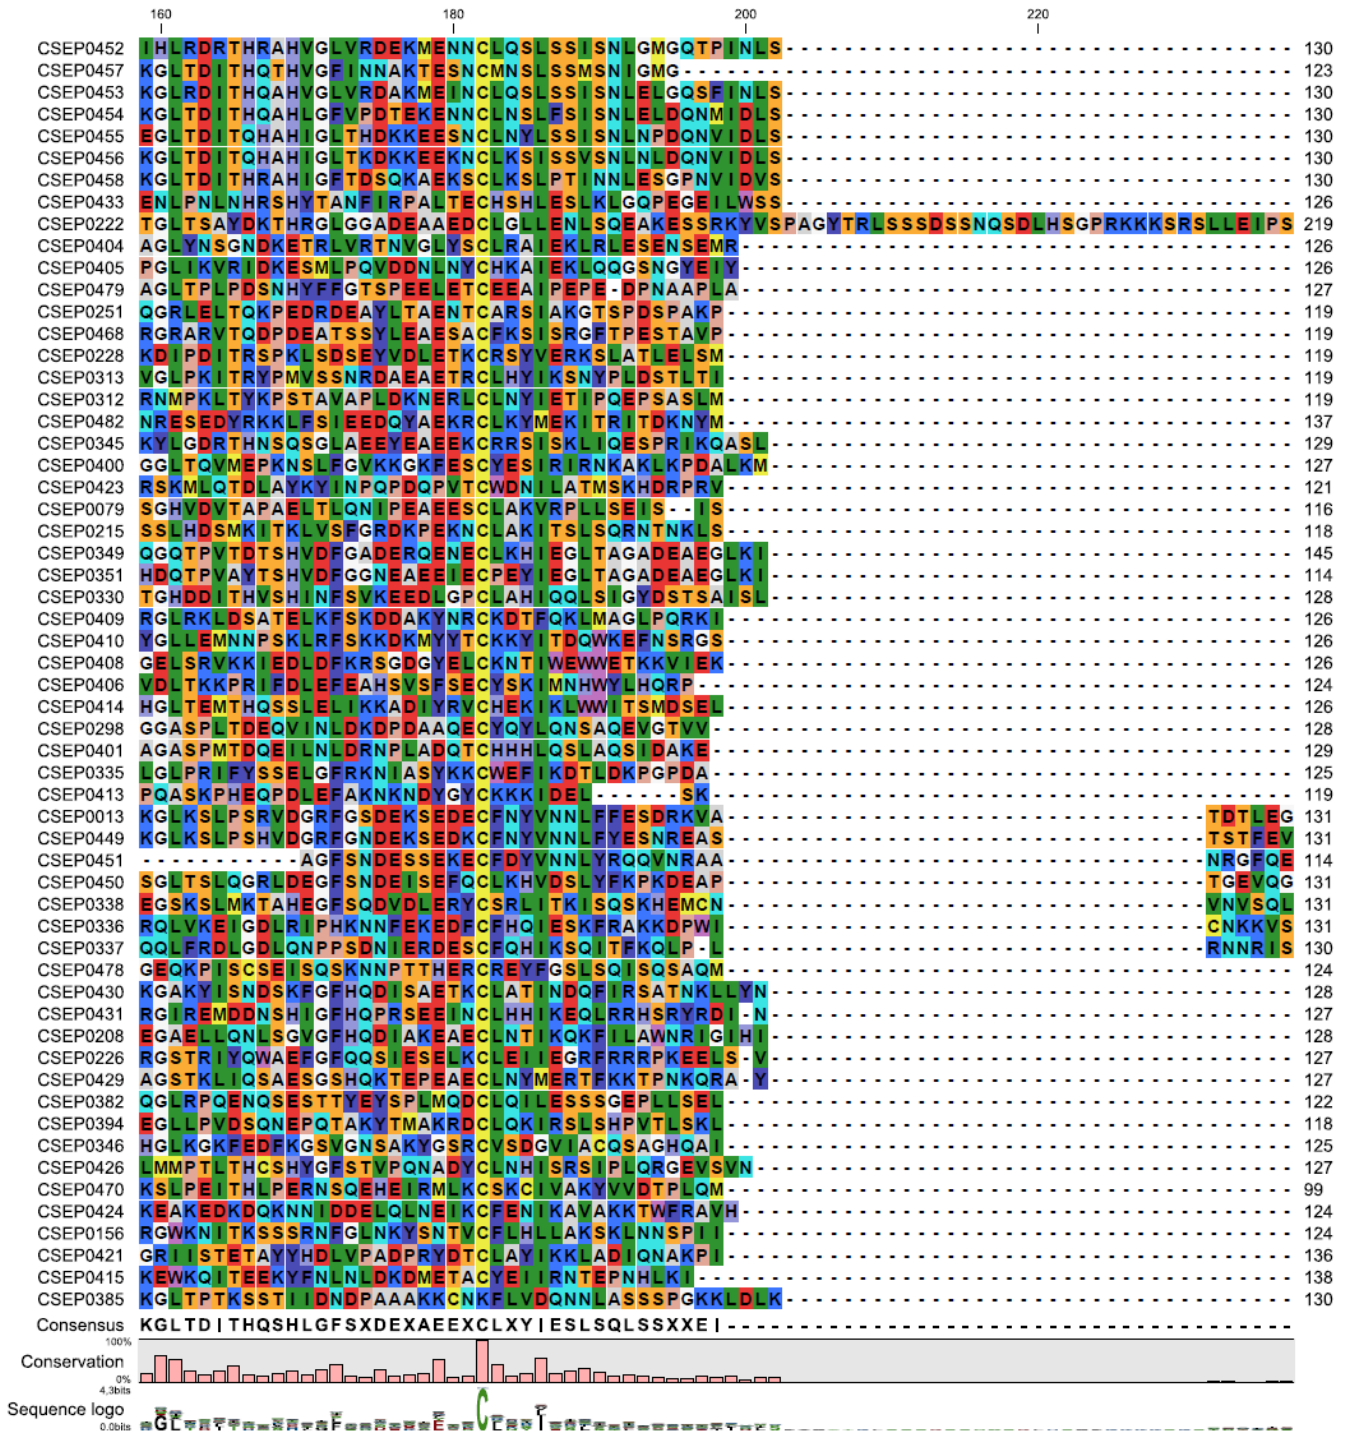



# CSEP family 1 (continued).

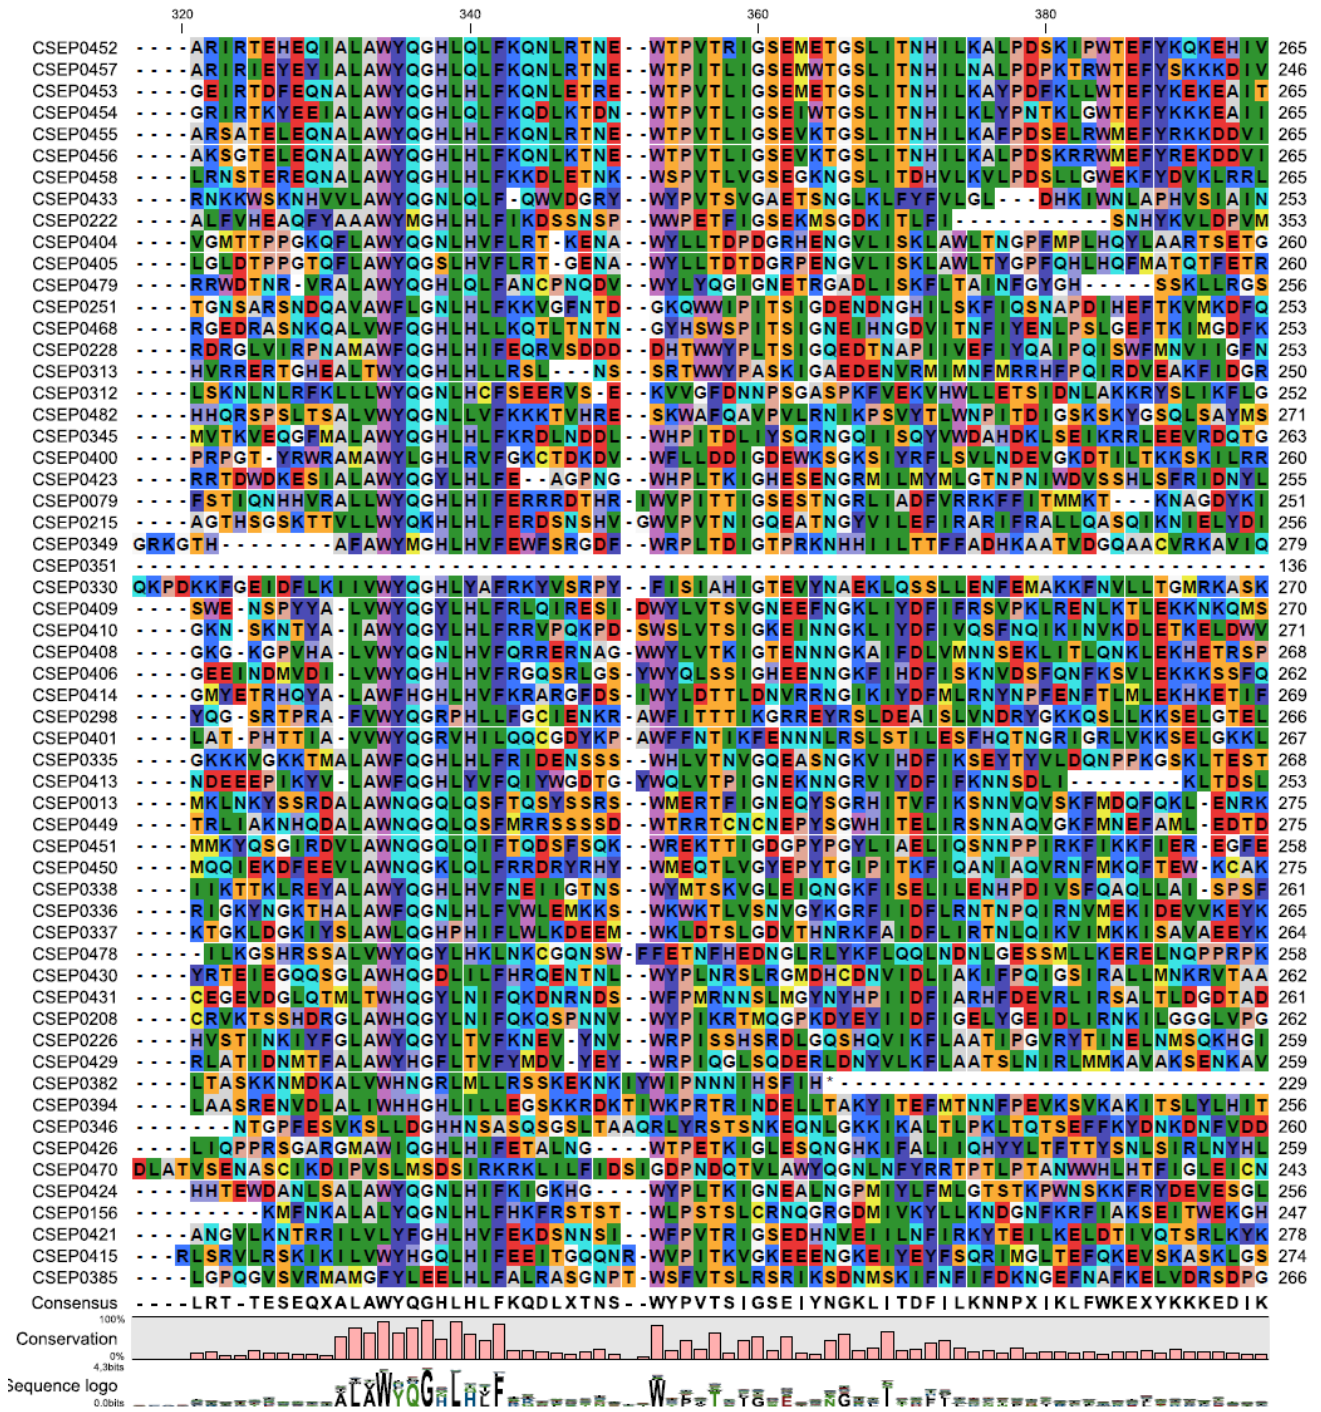

# CSEP family 1 (continued).

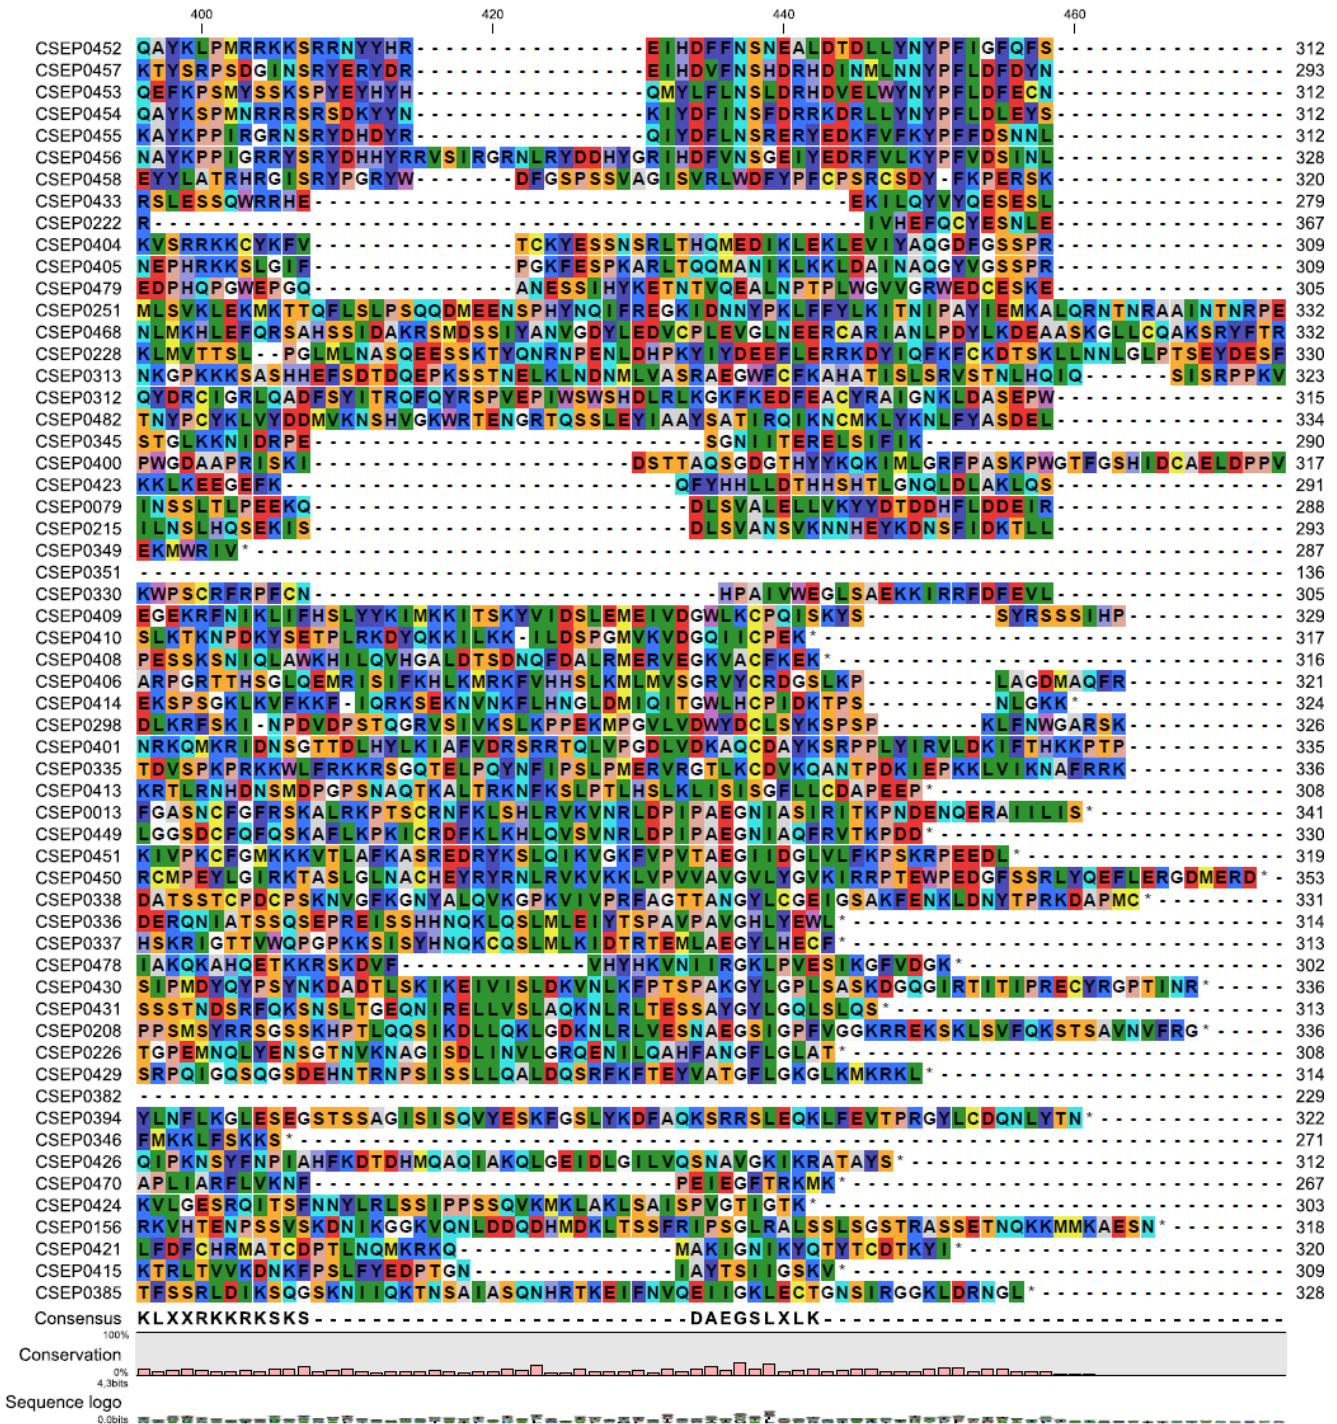

# CSEP family 1 (continued).

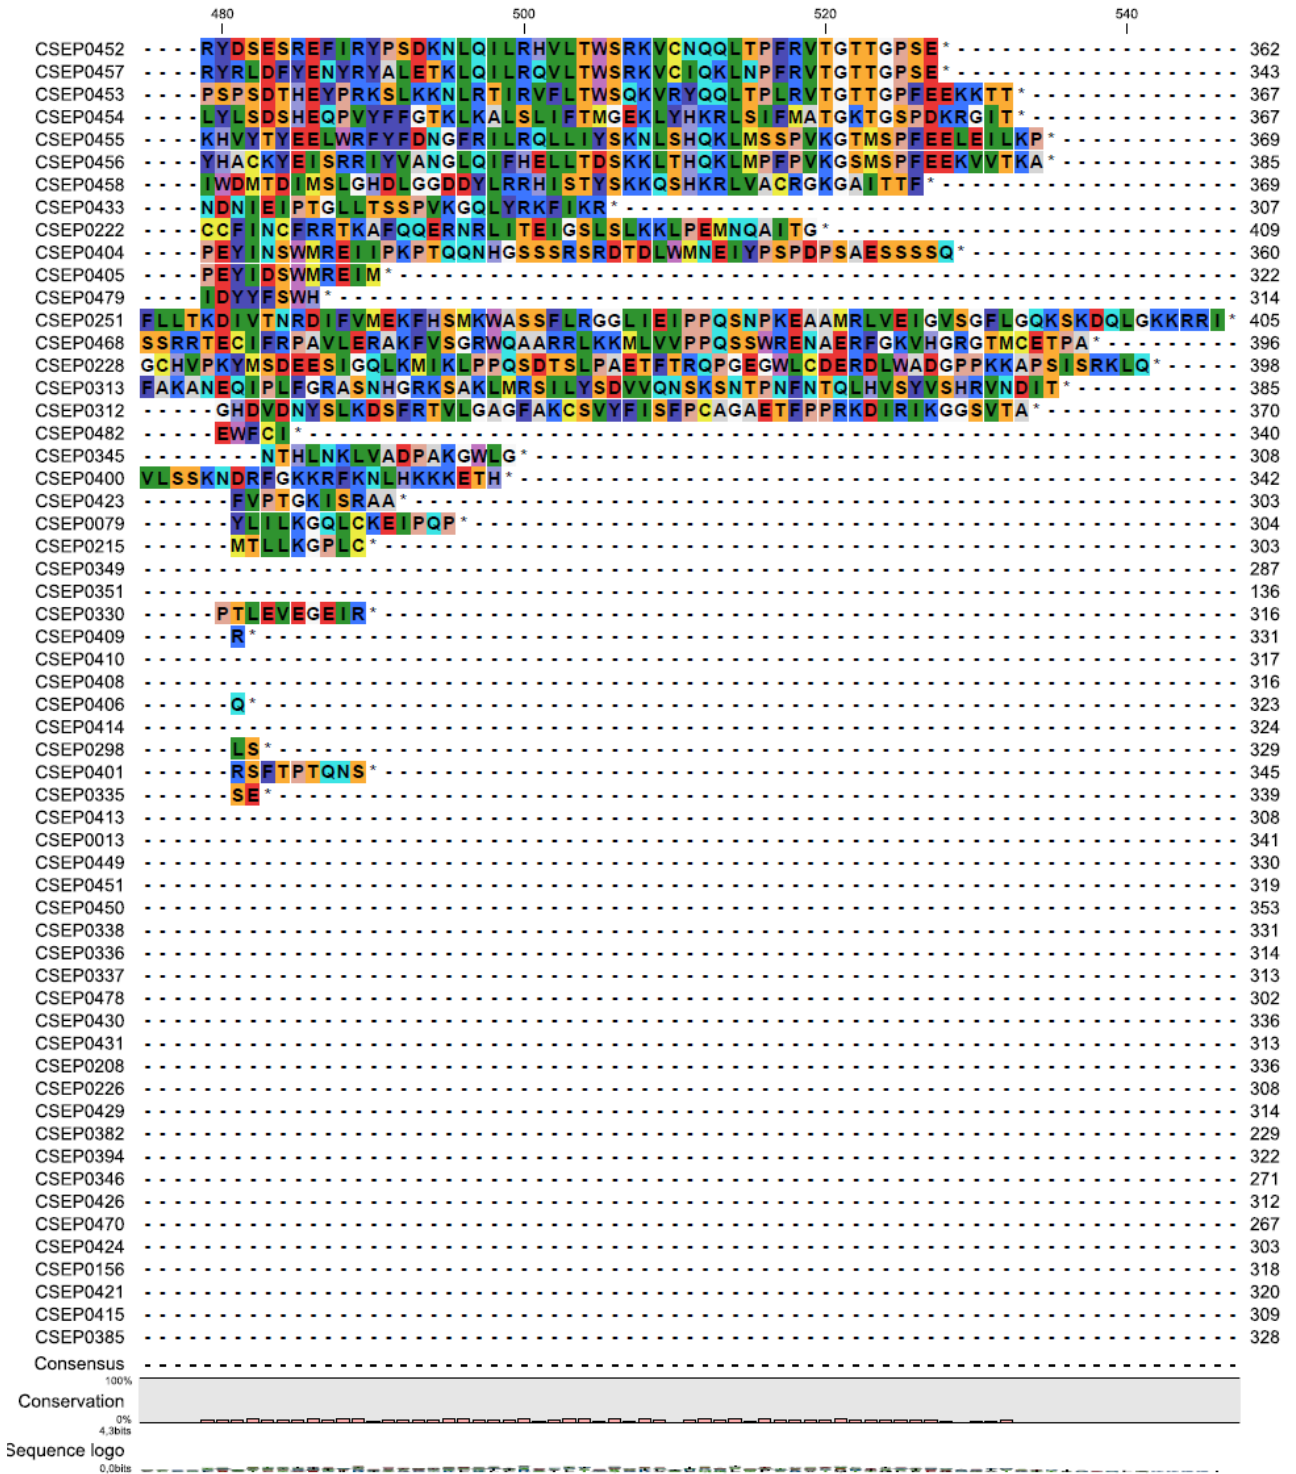

# CSEP family 2.

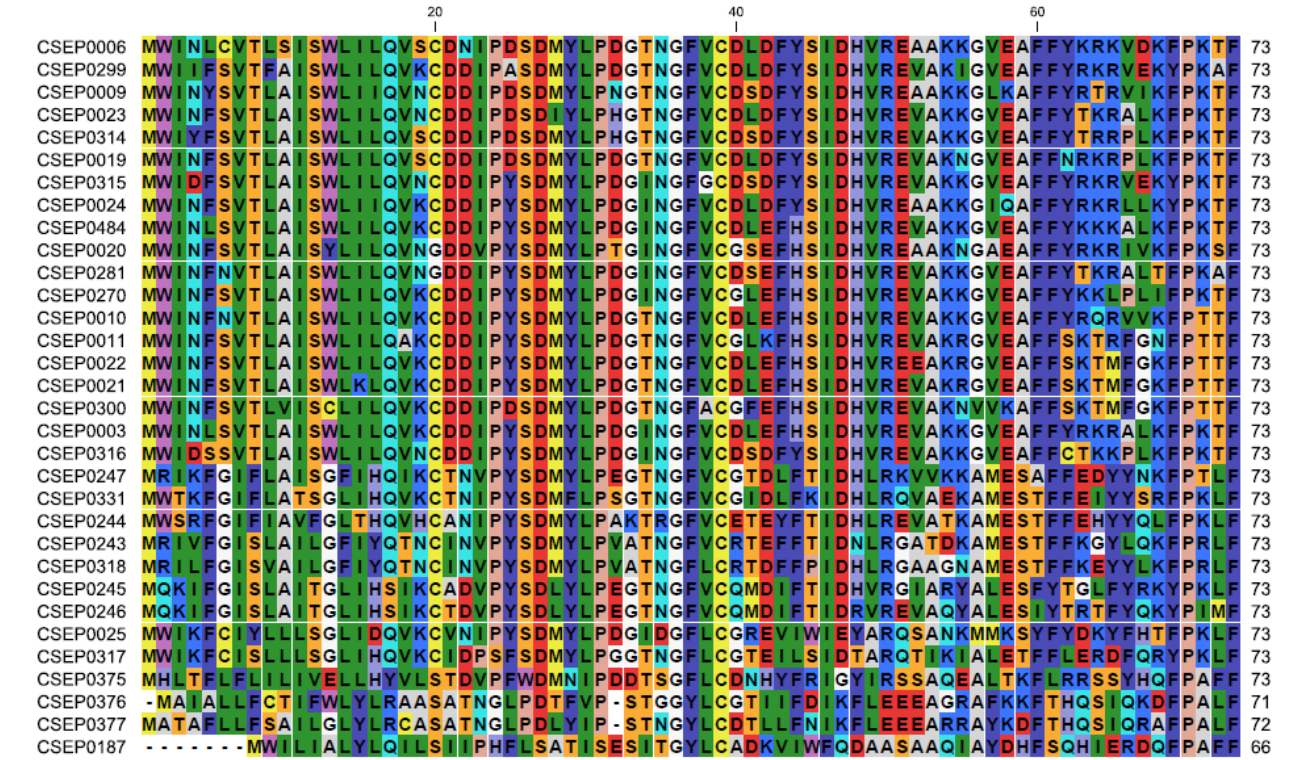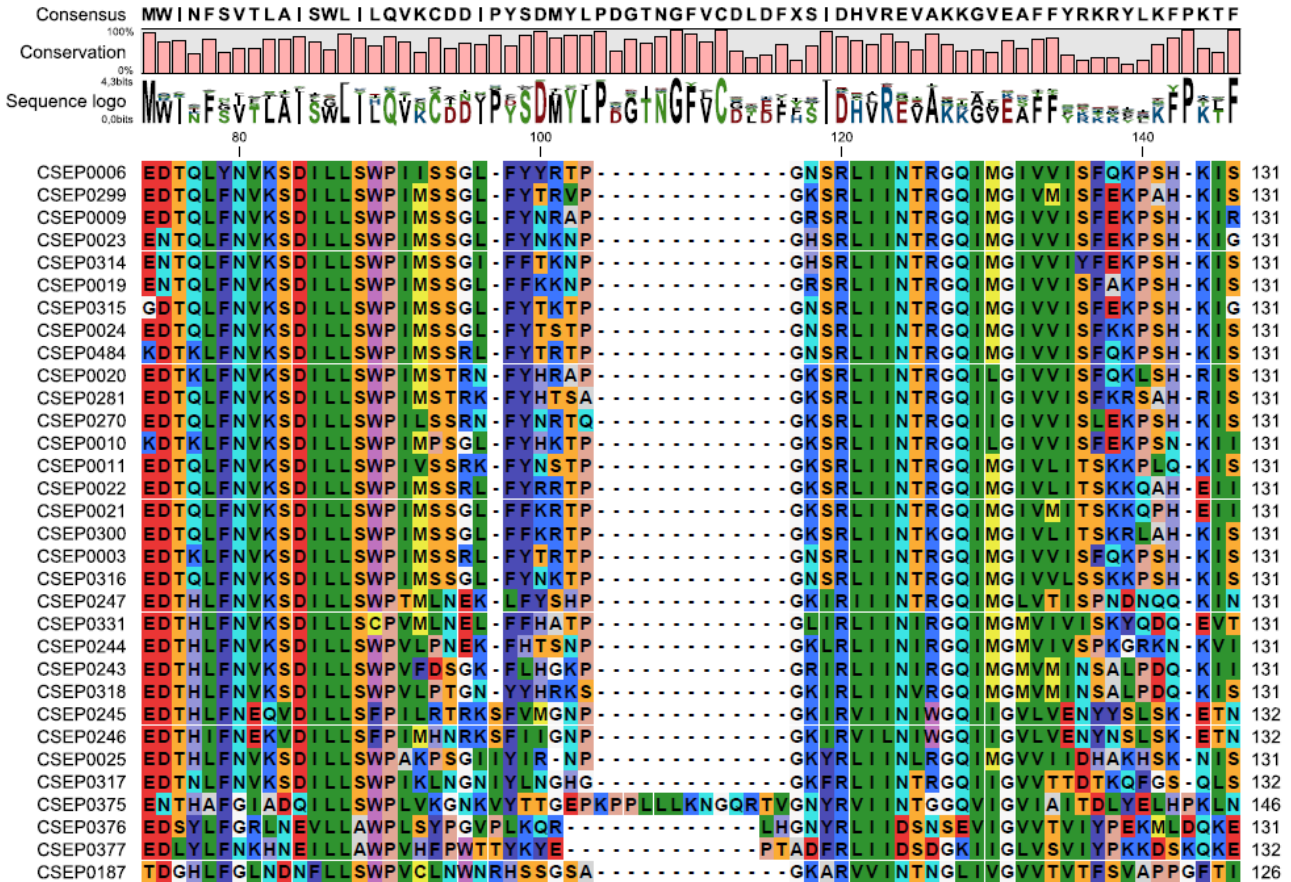



# CSEP family 2 (continued).

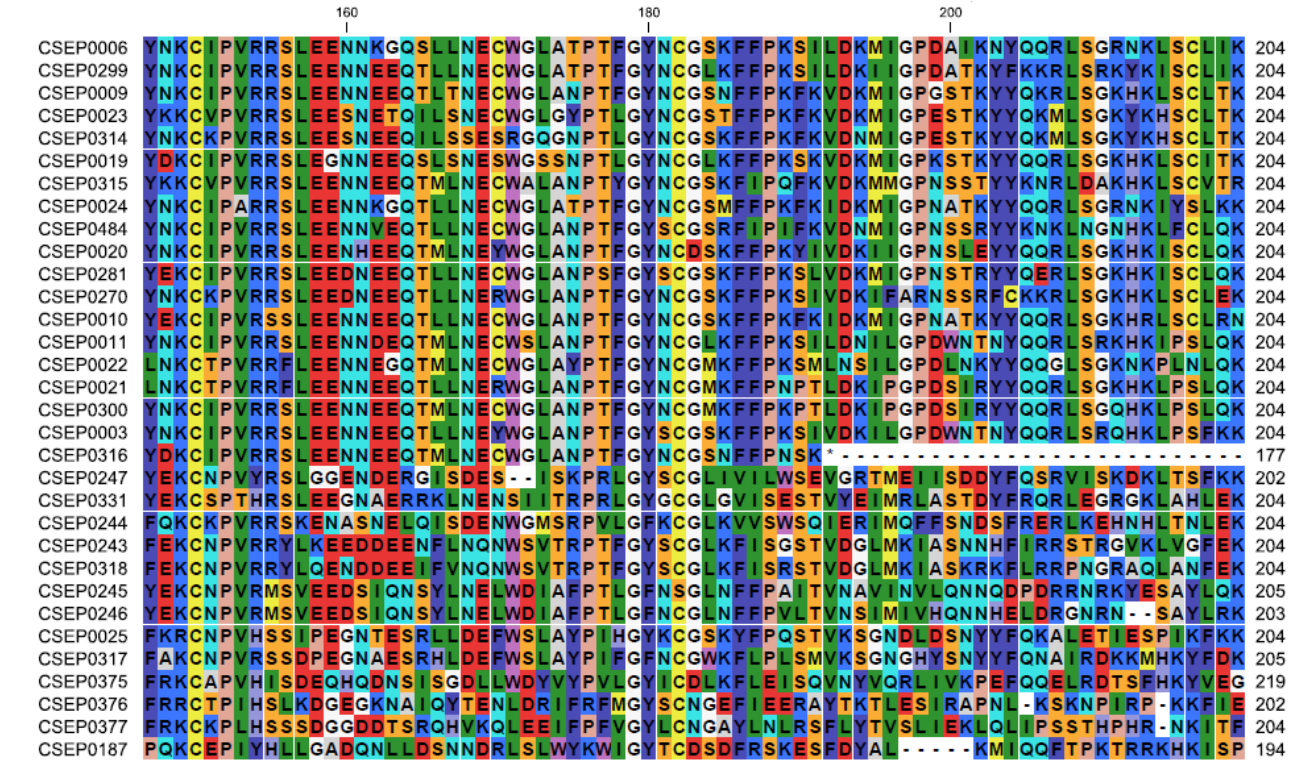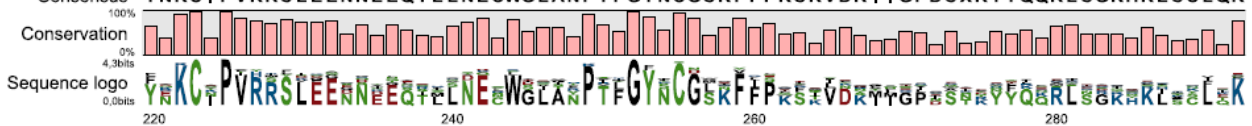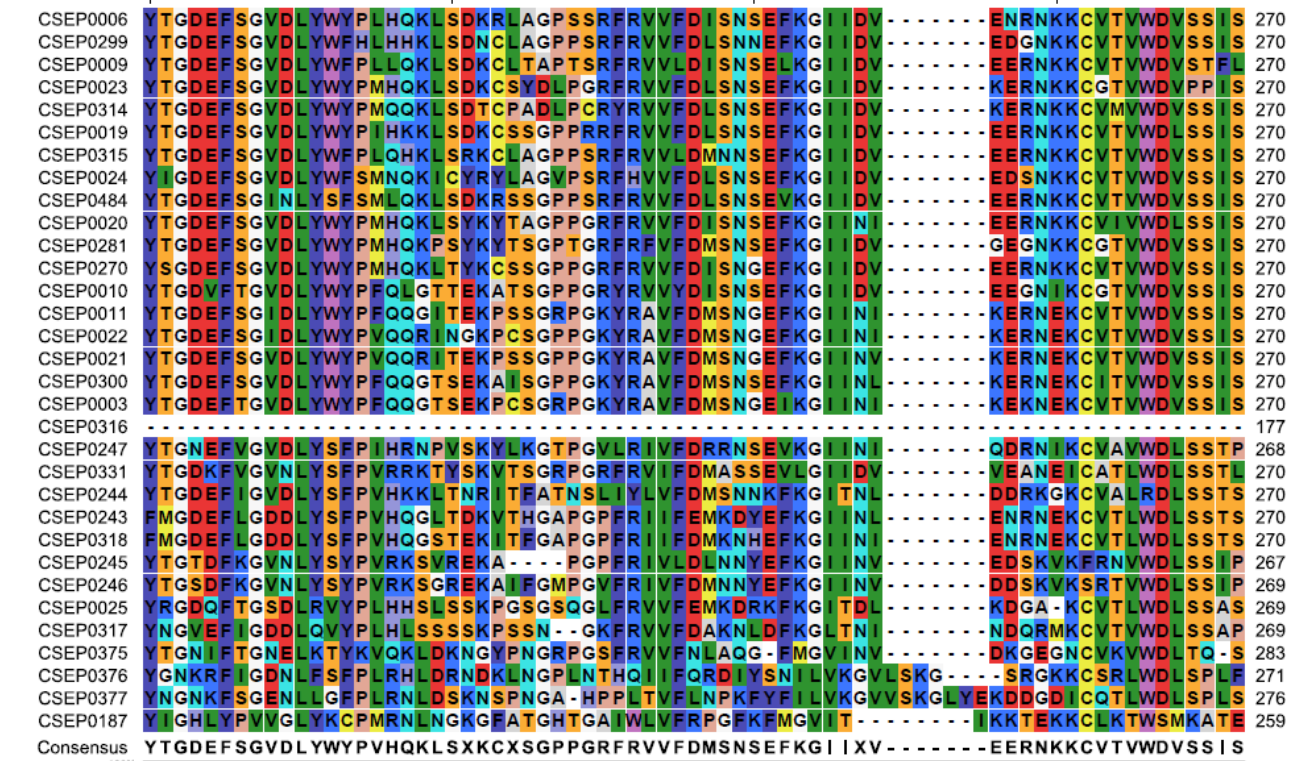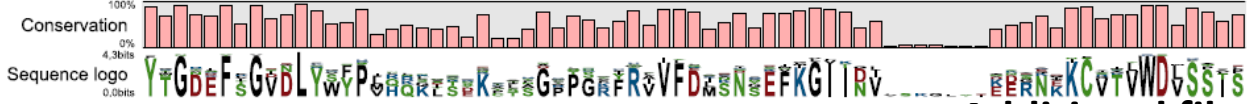

# CSEP family 2 (continued).

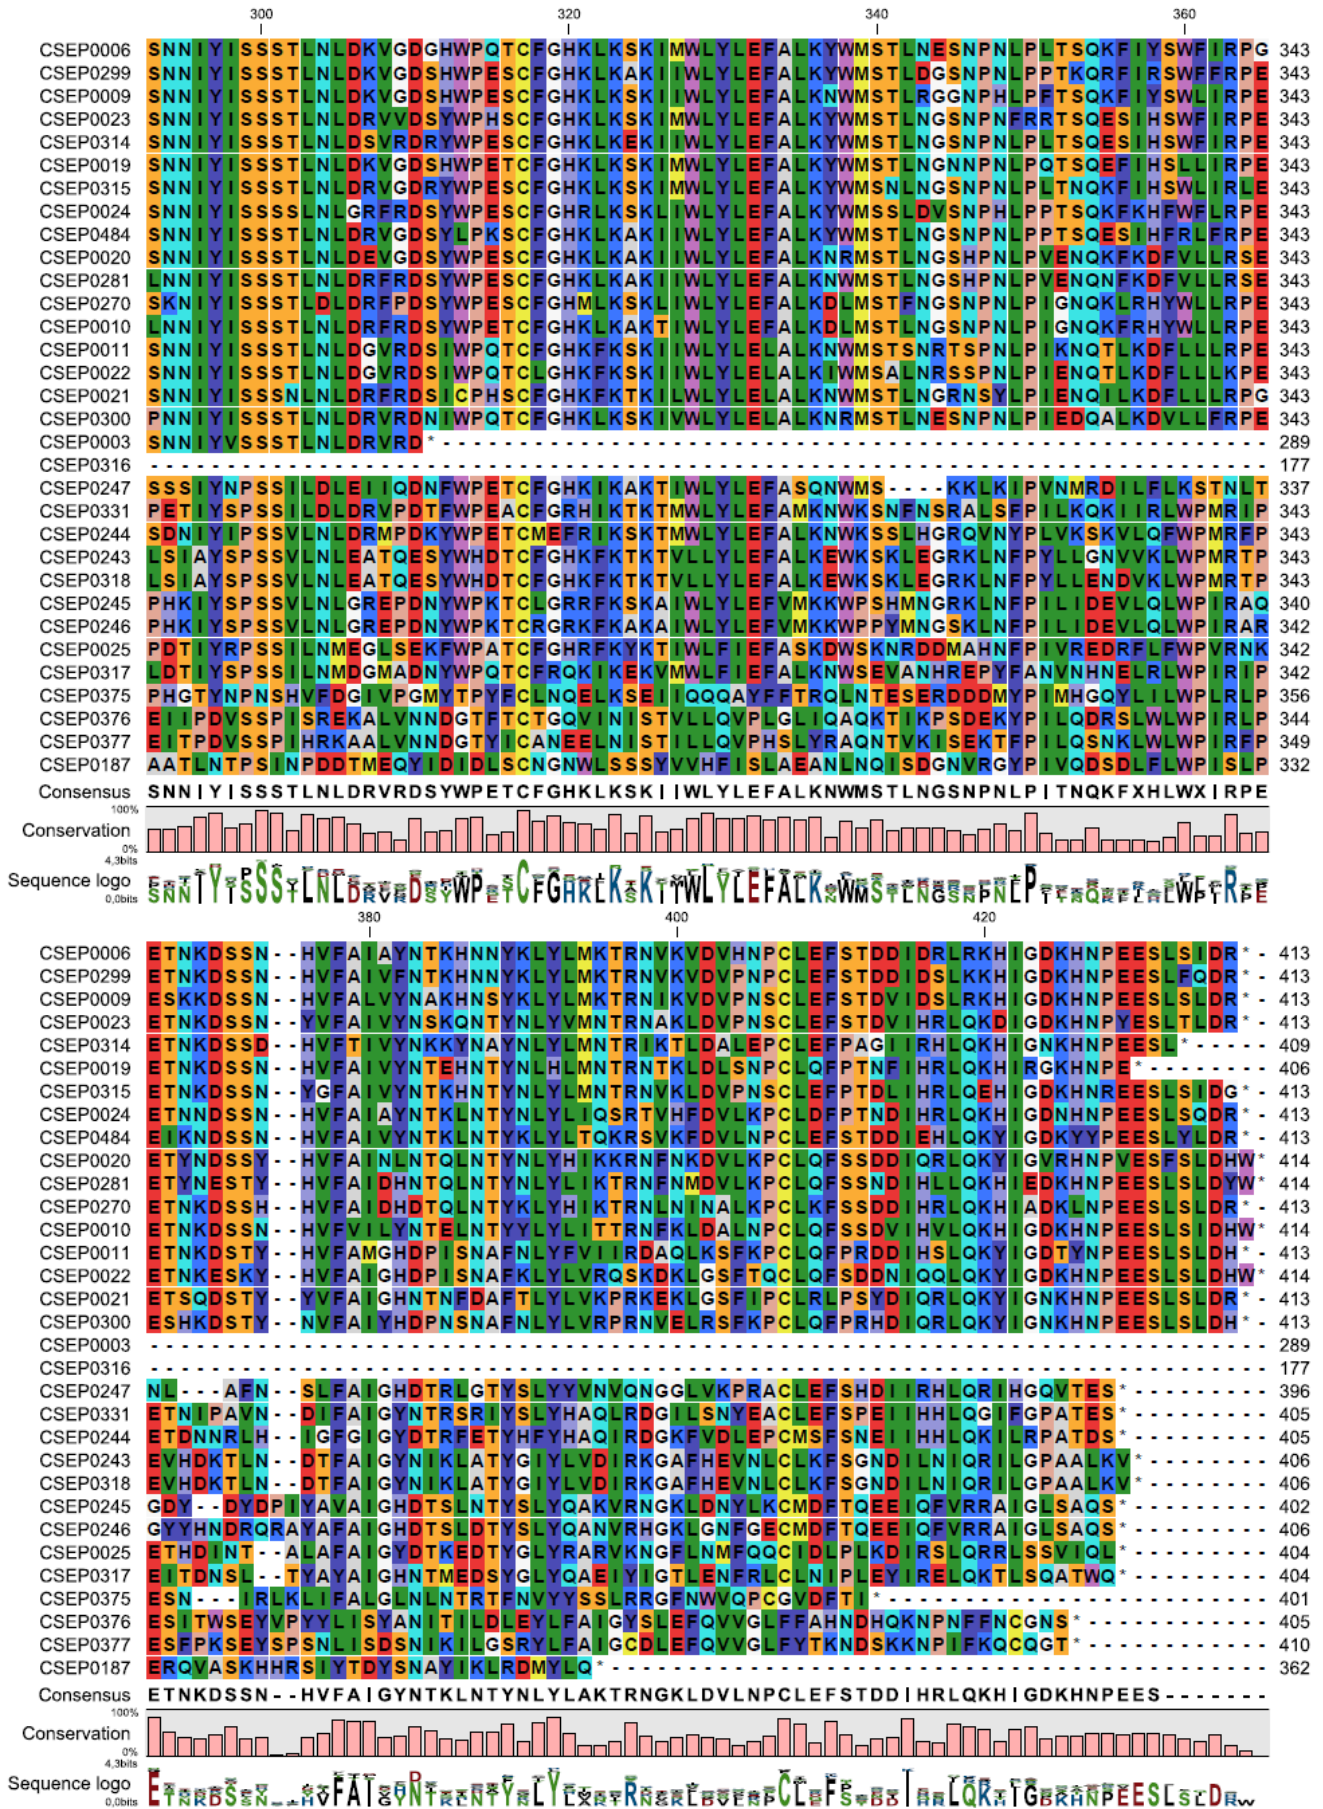



# CSEP family 3 (continued).

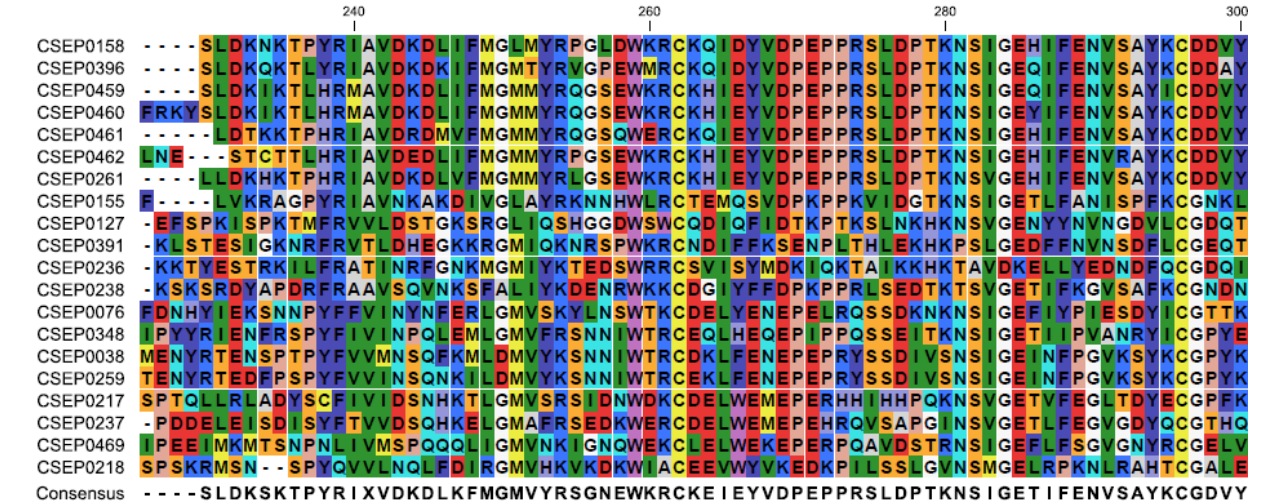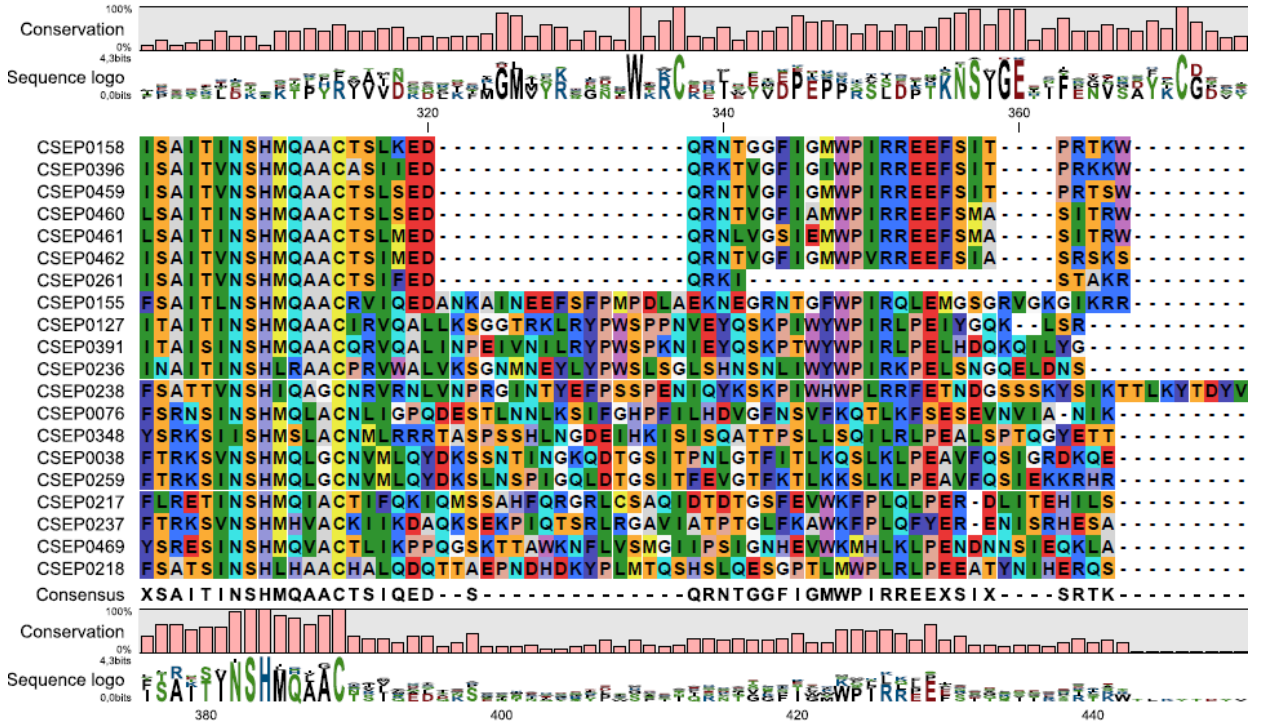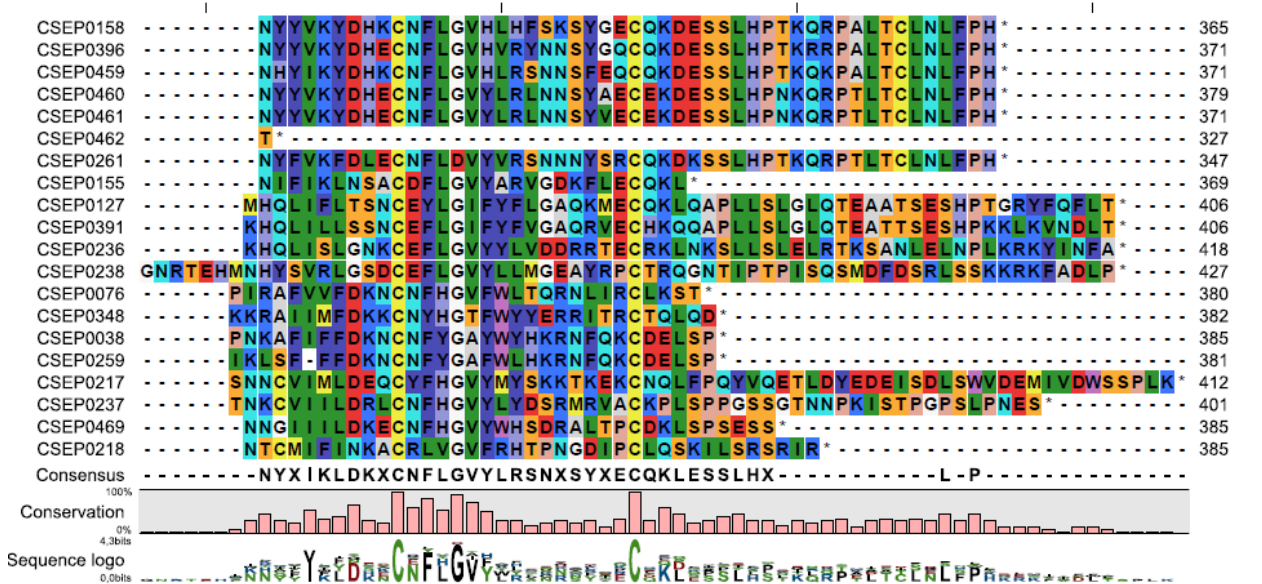

# CSEP family 4.

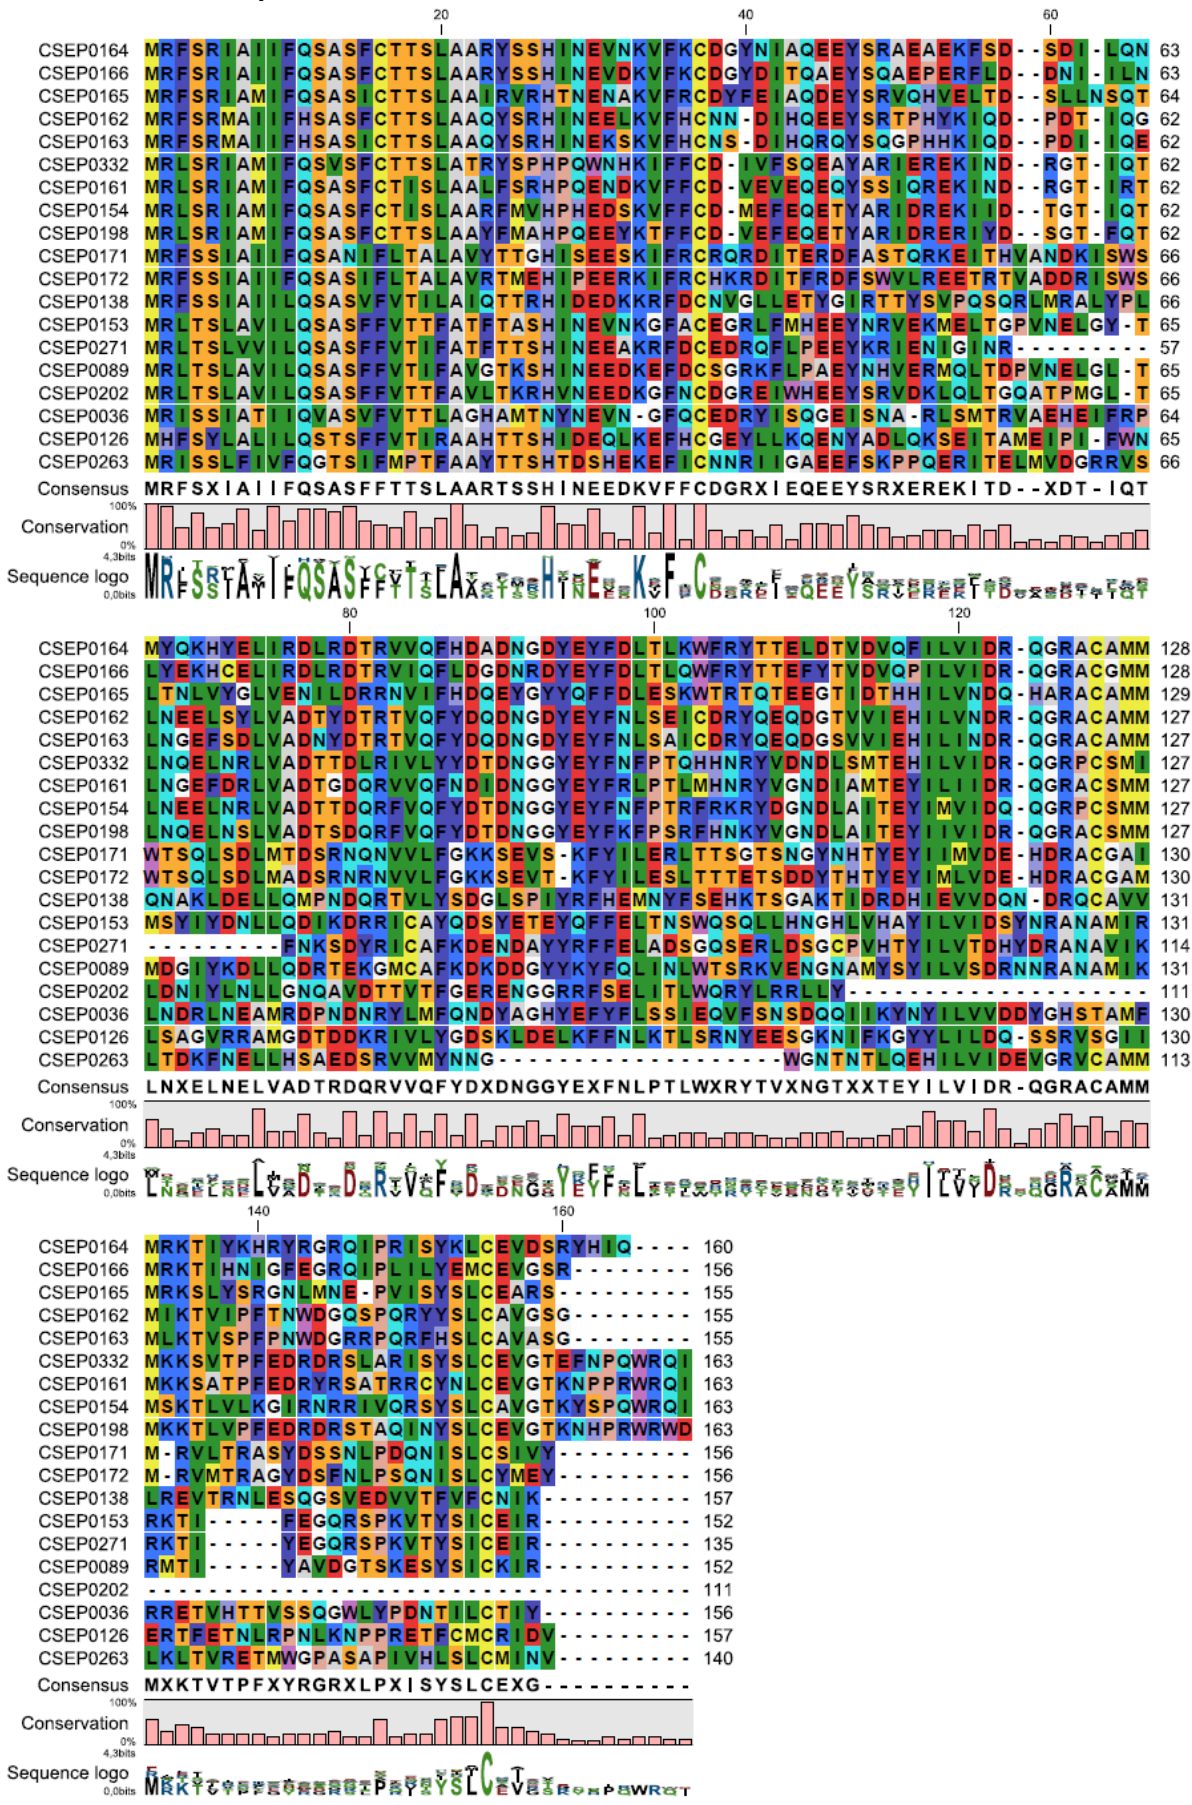

# CSEP family 5.

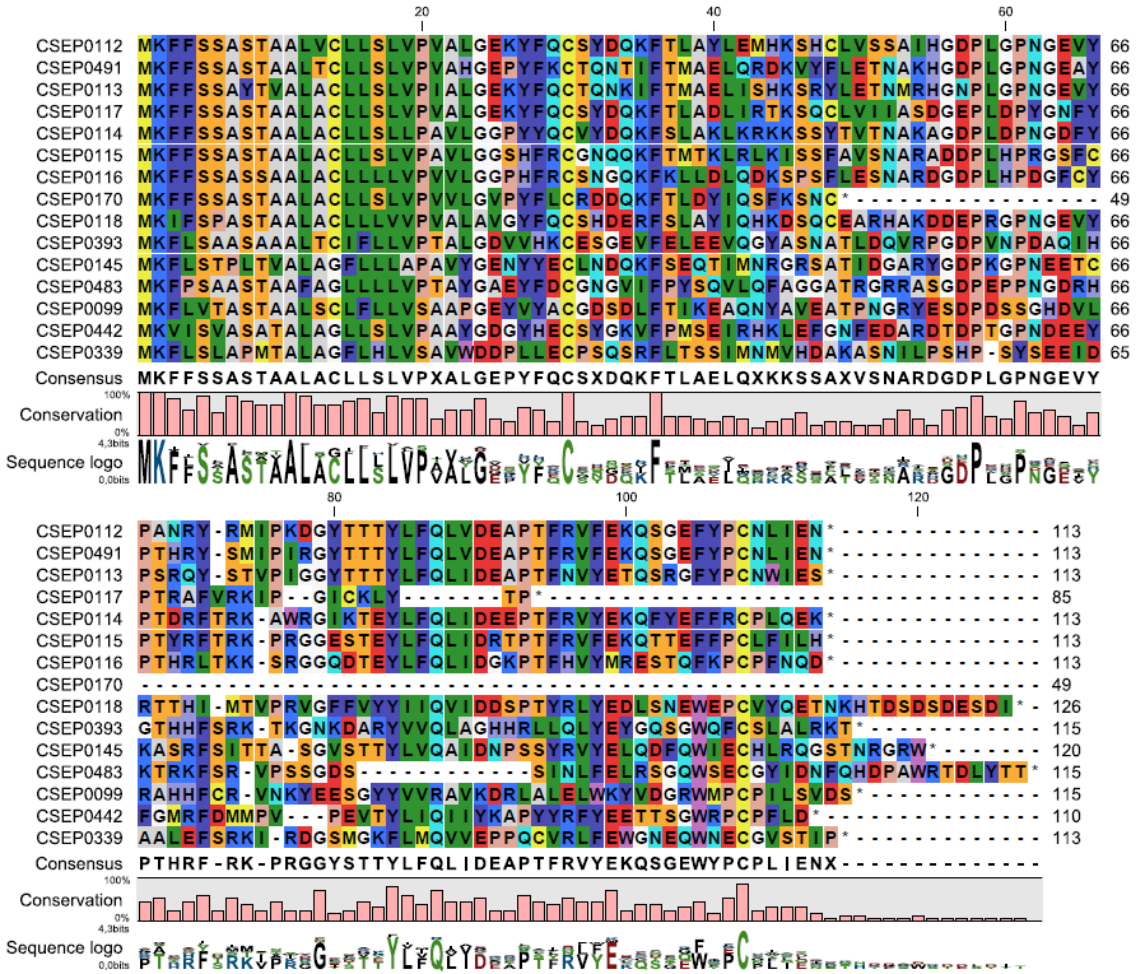

# CSEP family 6.

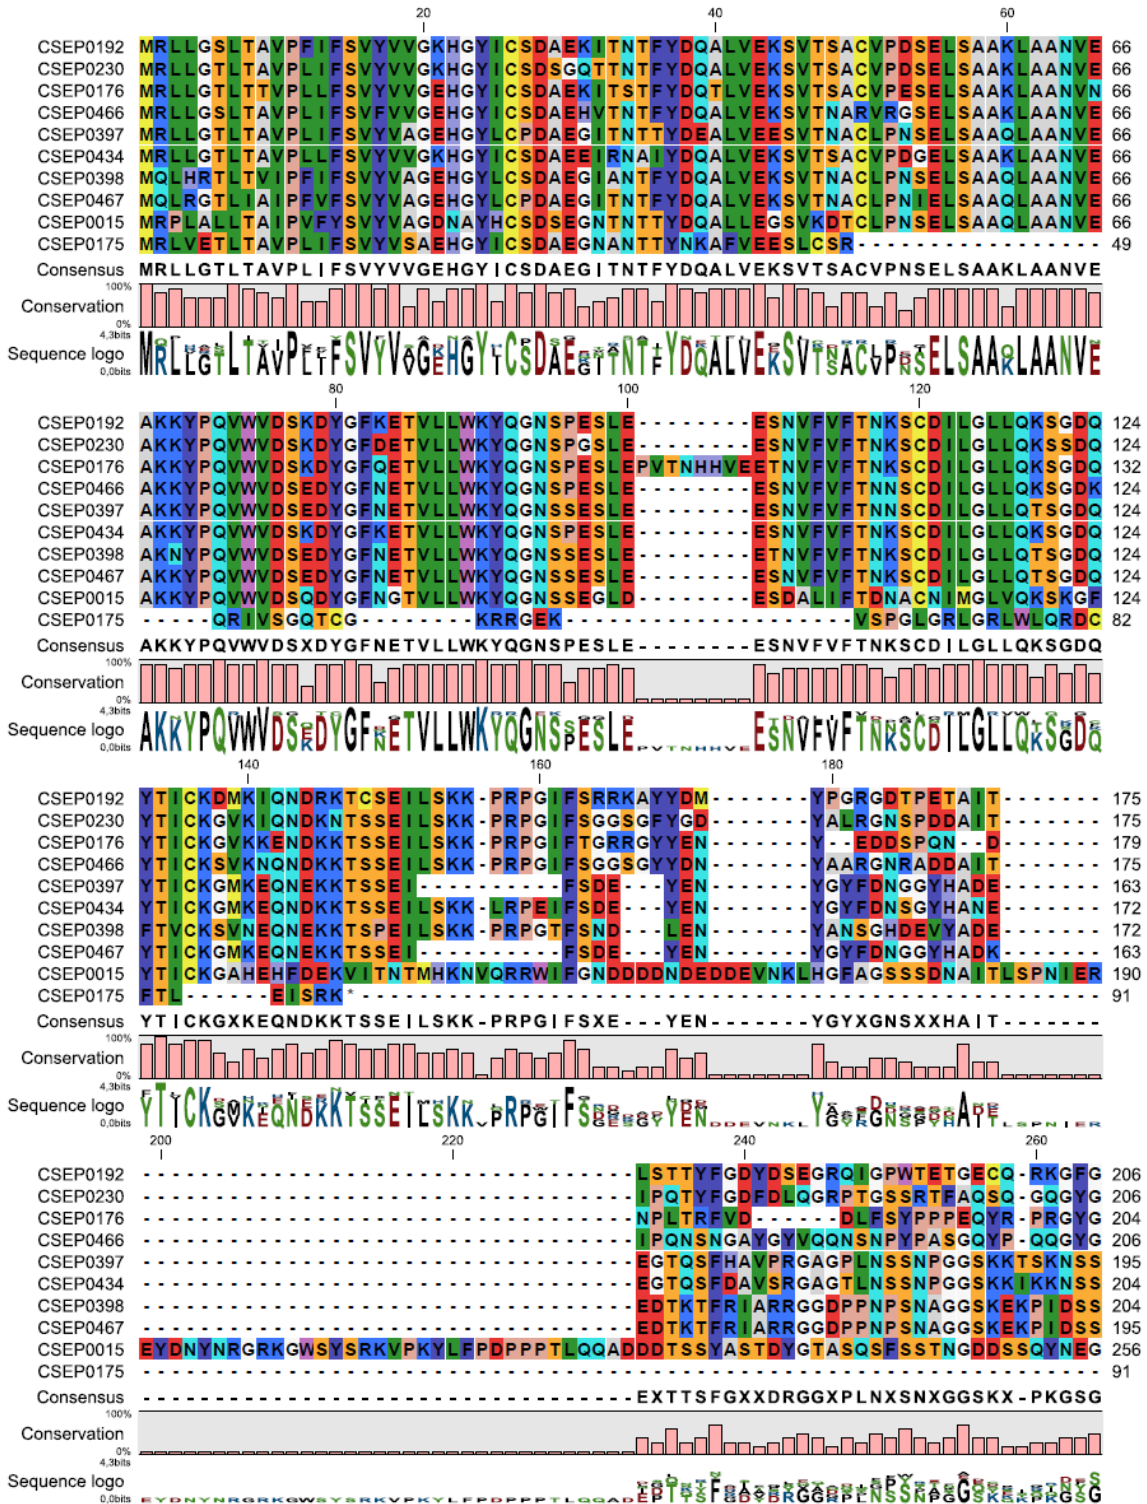





# CSEP family 7.

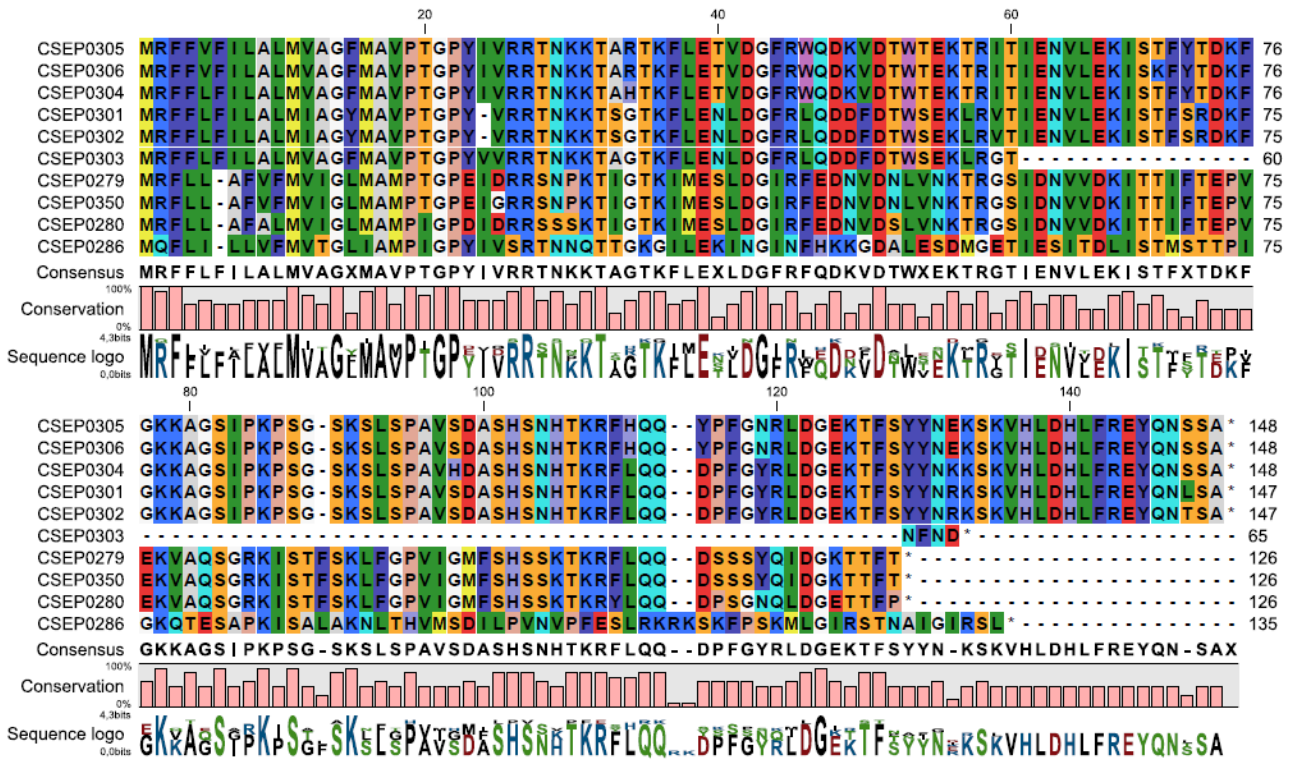

# CSEP family 8.

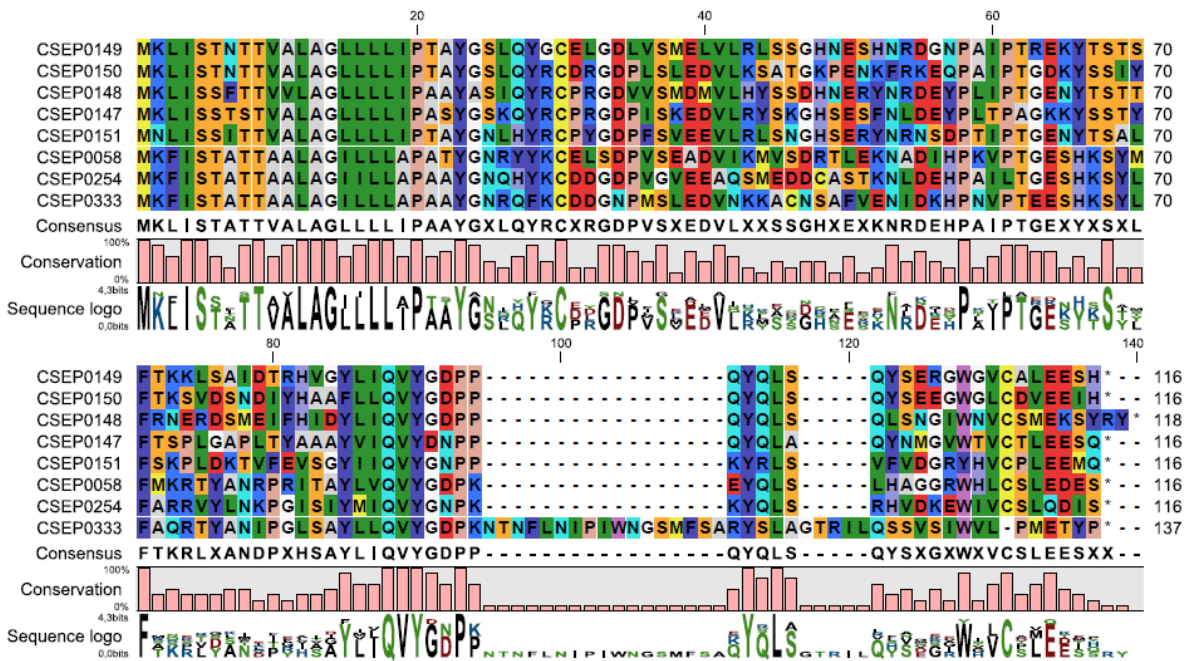



# CSEP family 11.

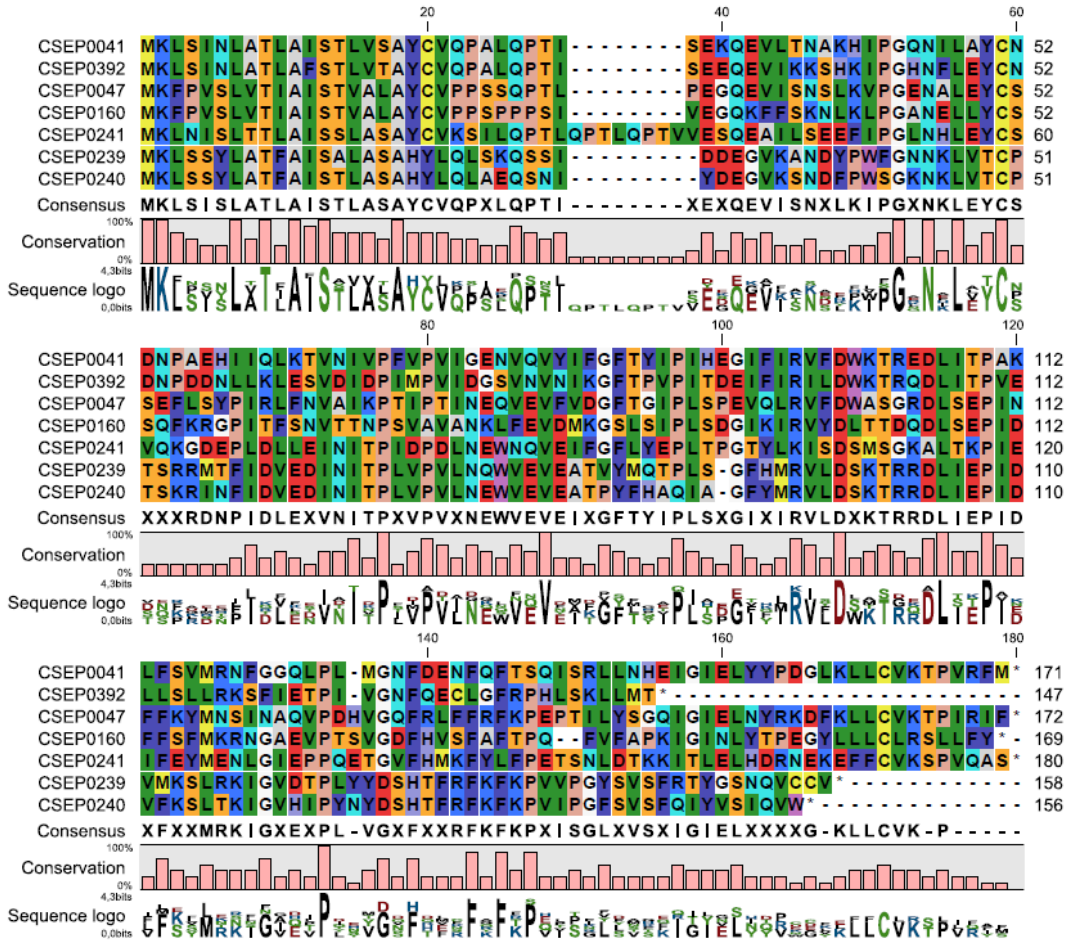

# CSEP family 12.

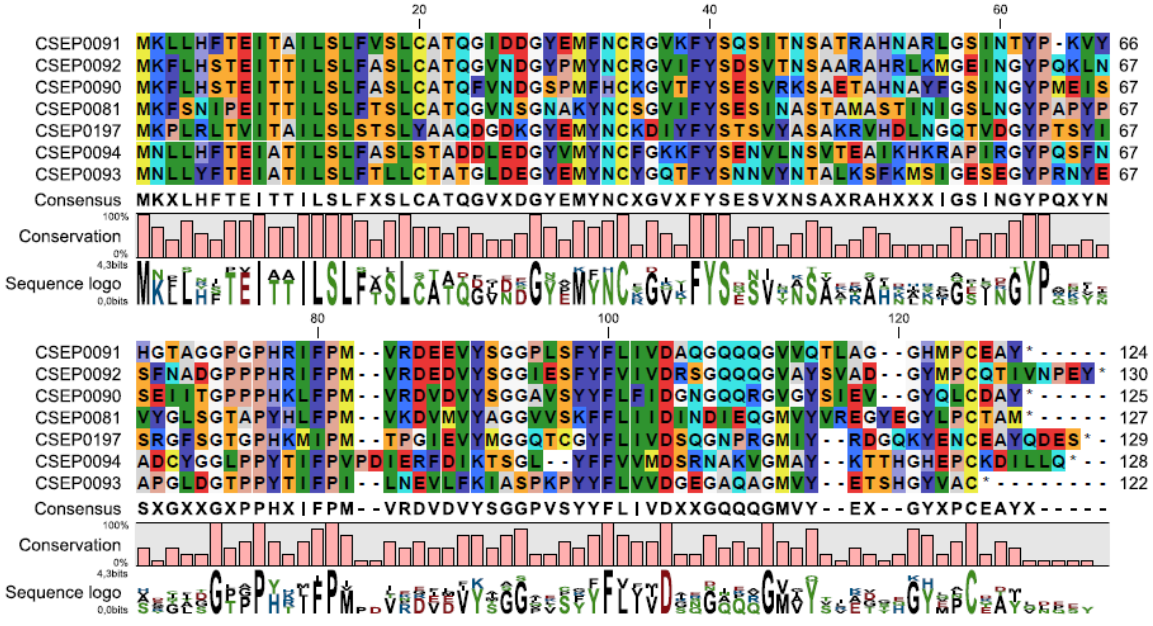

# CSEP family 13.

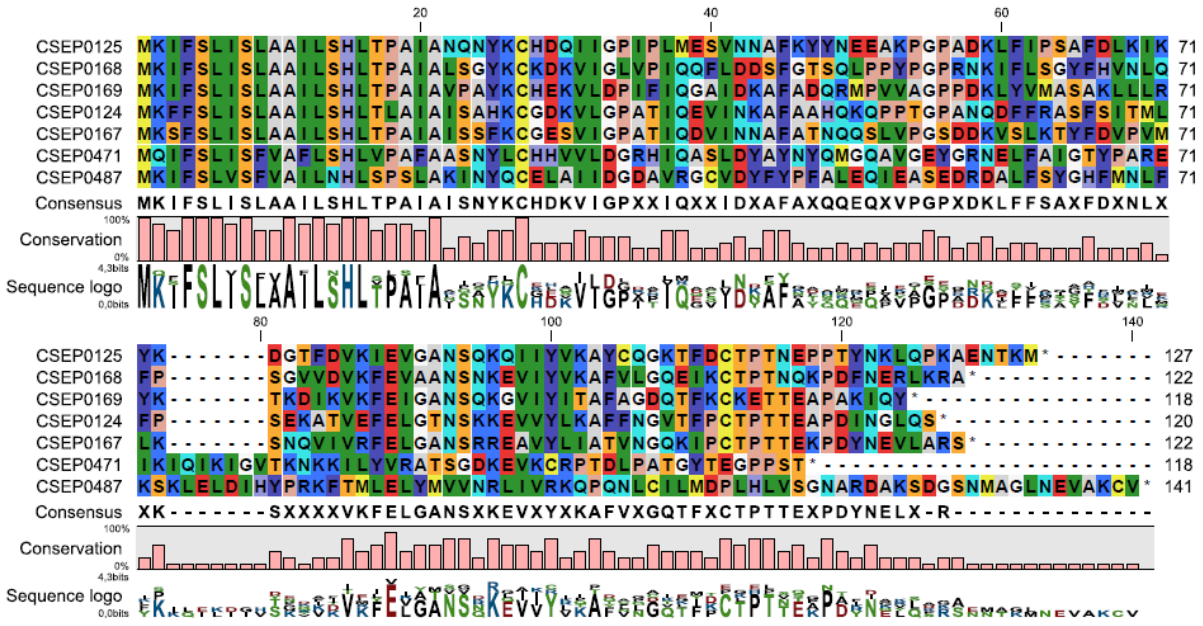

# CSEP family 14.

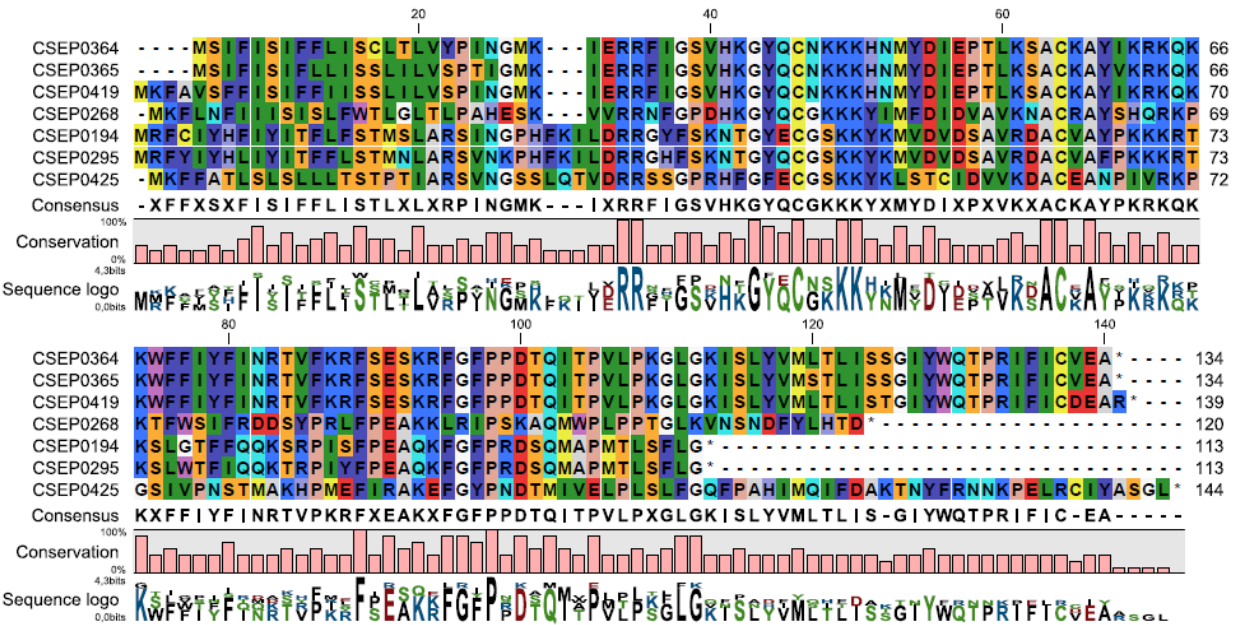

# CSEP family 15.

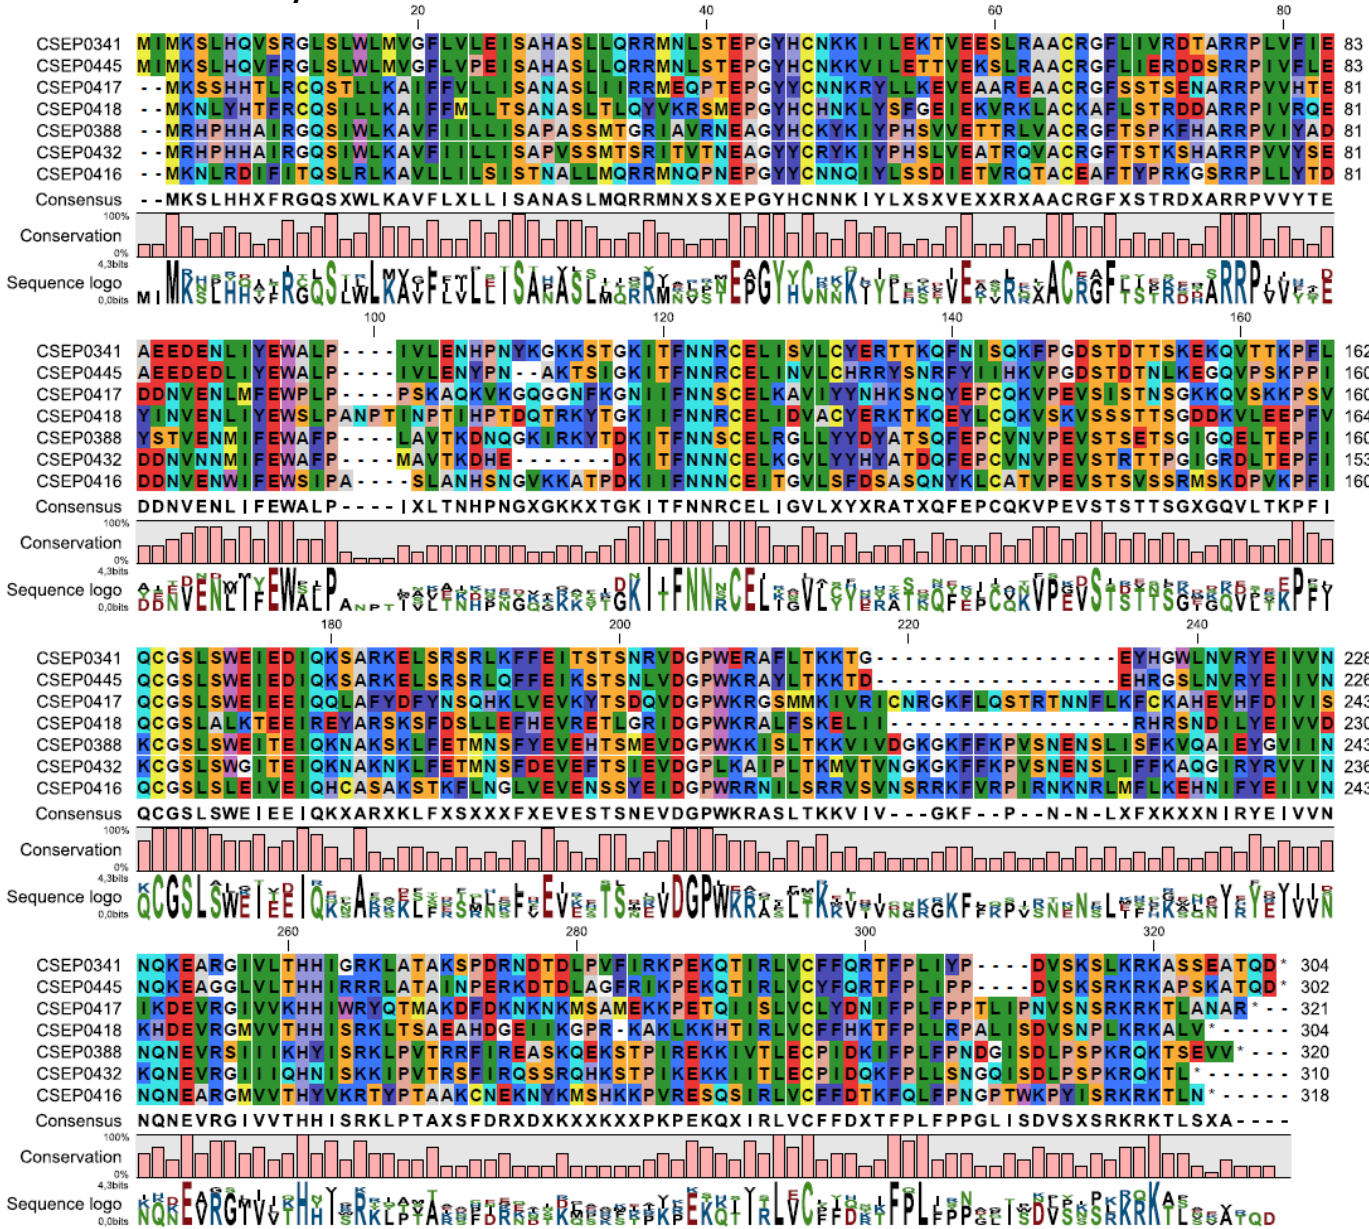

# CSEP family 16.

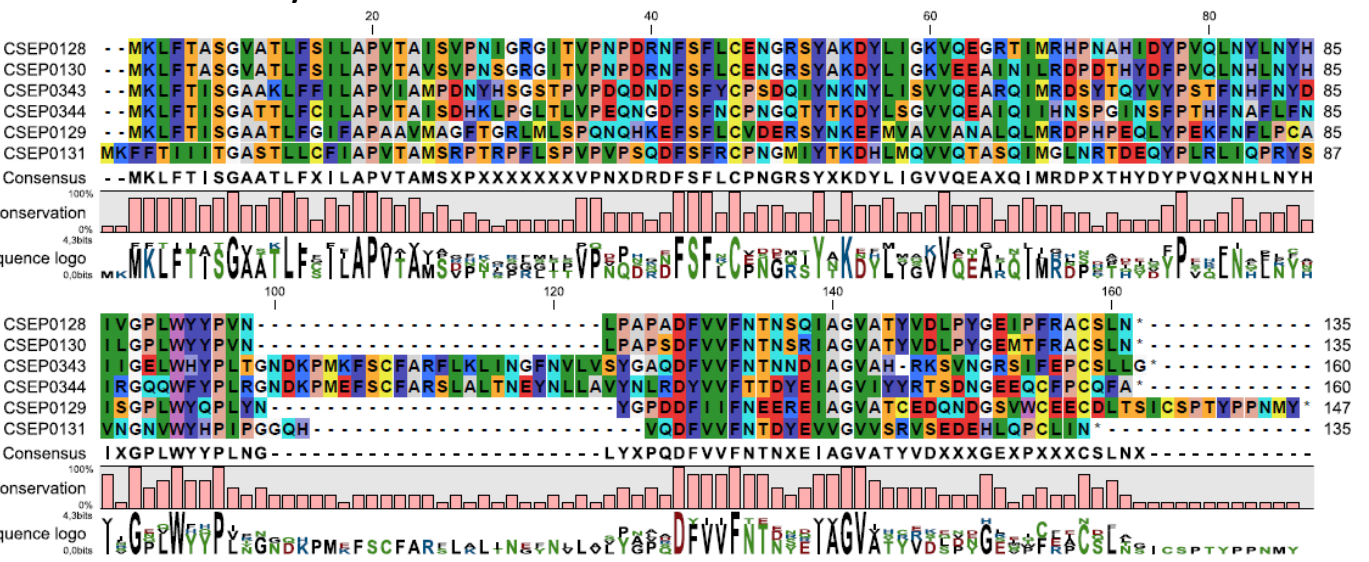

# CSEP family 17.

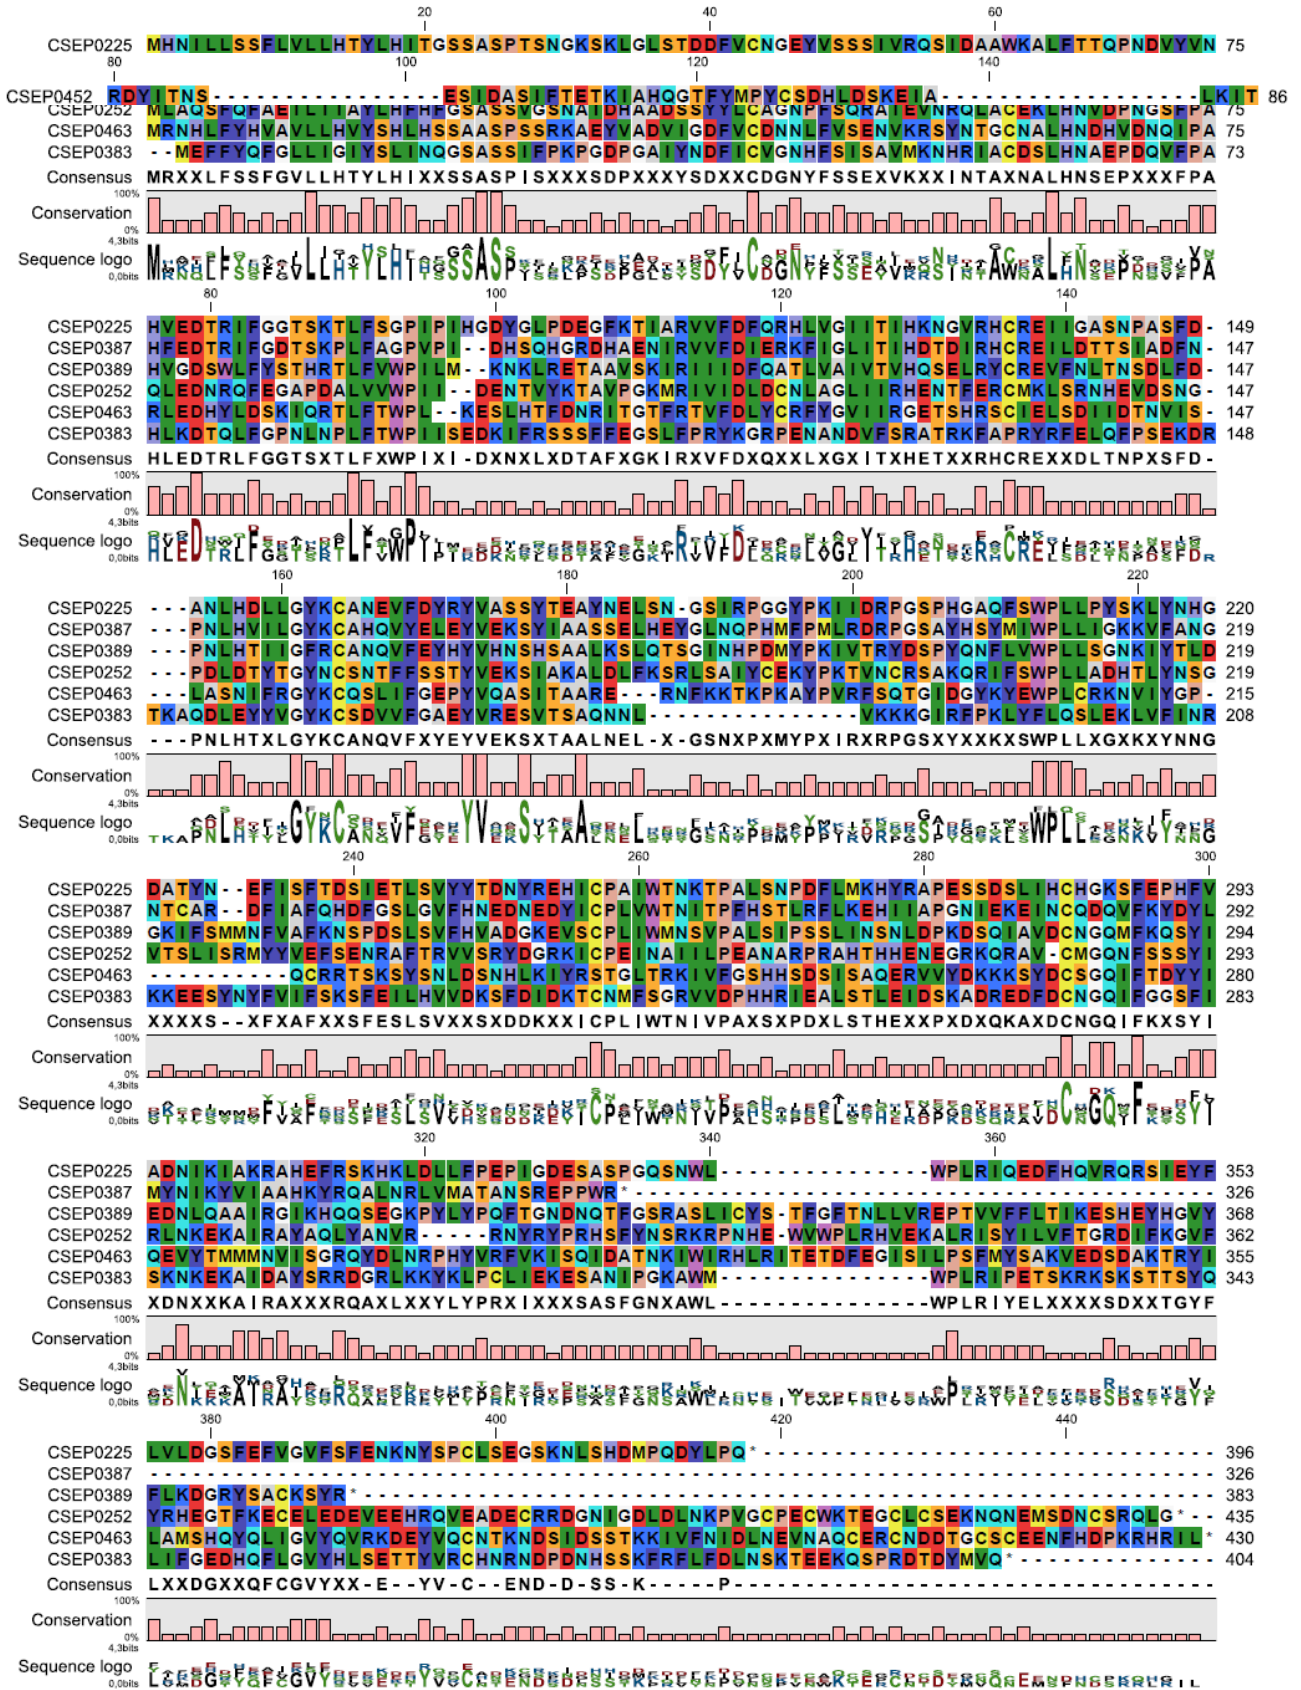



# CSEP family 20.

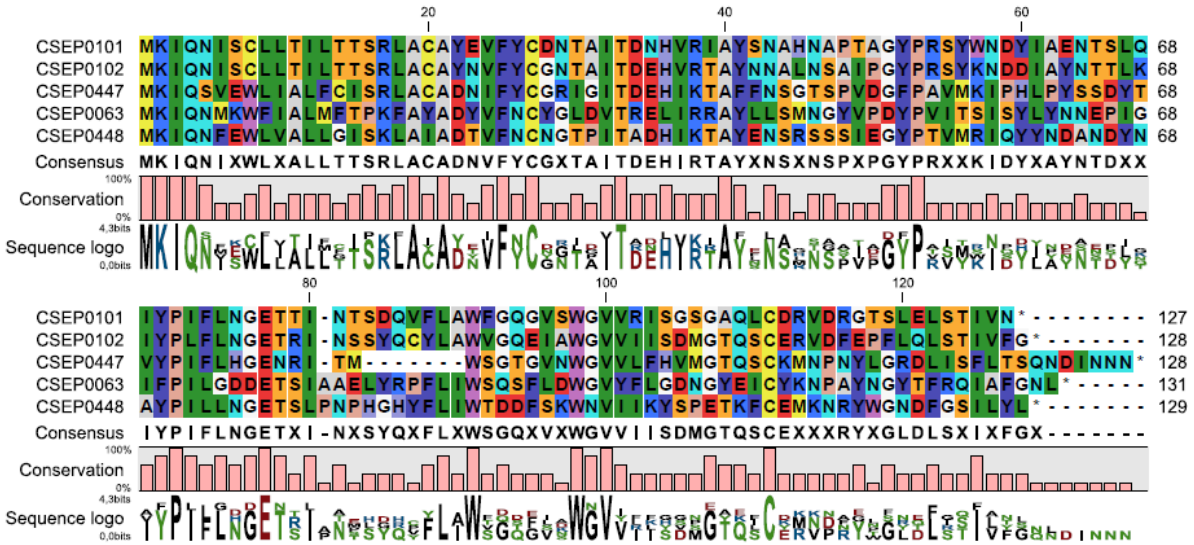

# CSEP family 21.

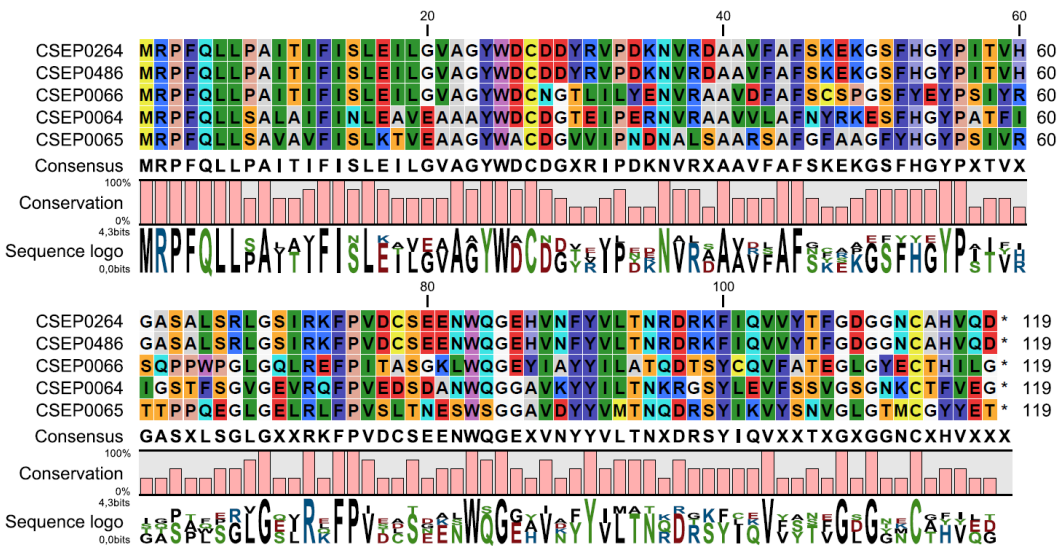



## CSEP family 22.

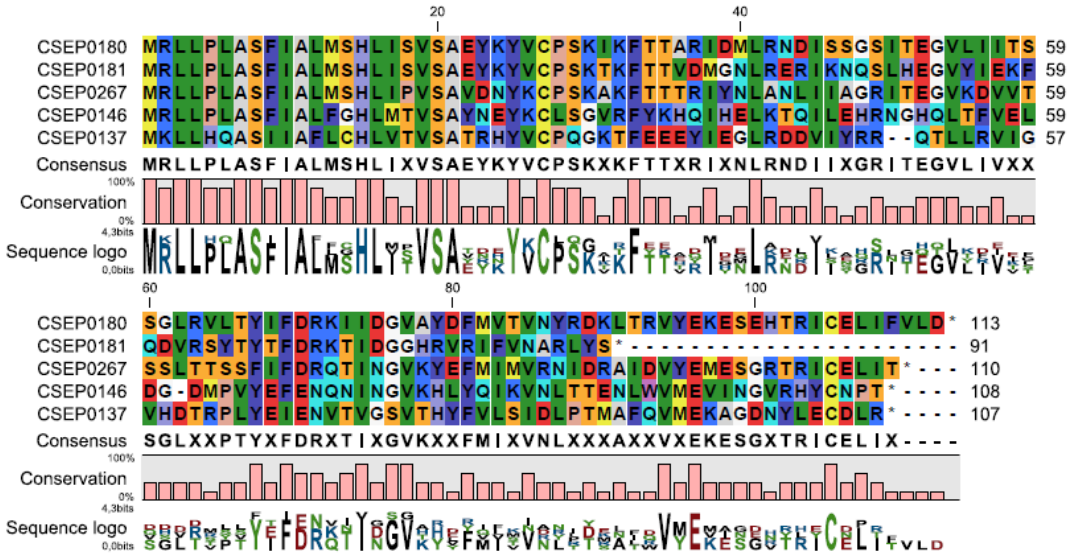

## CSEP family 23.

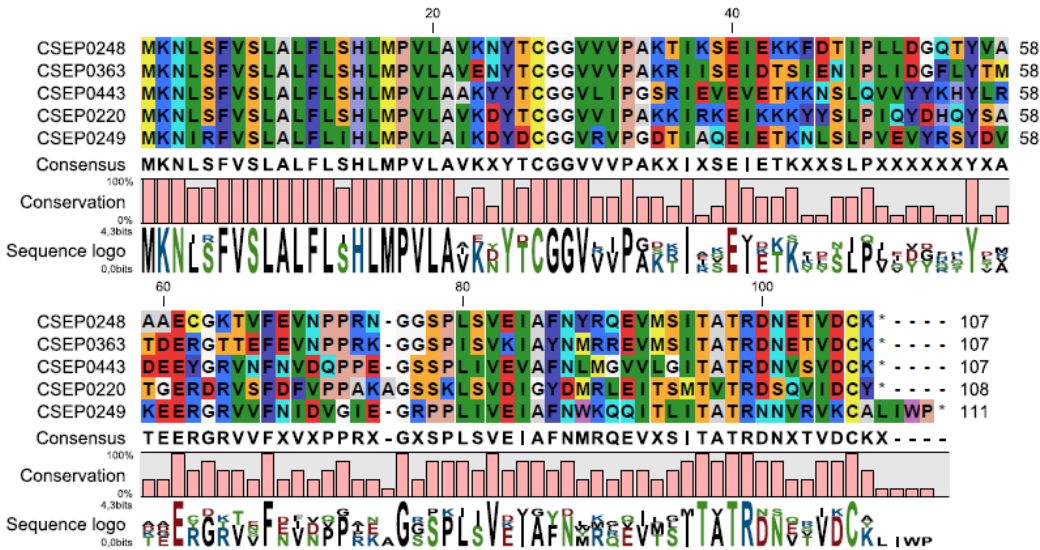

## CSEP family 24.

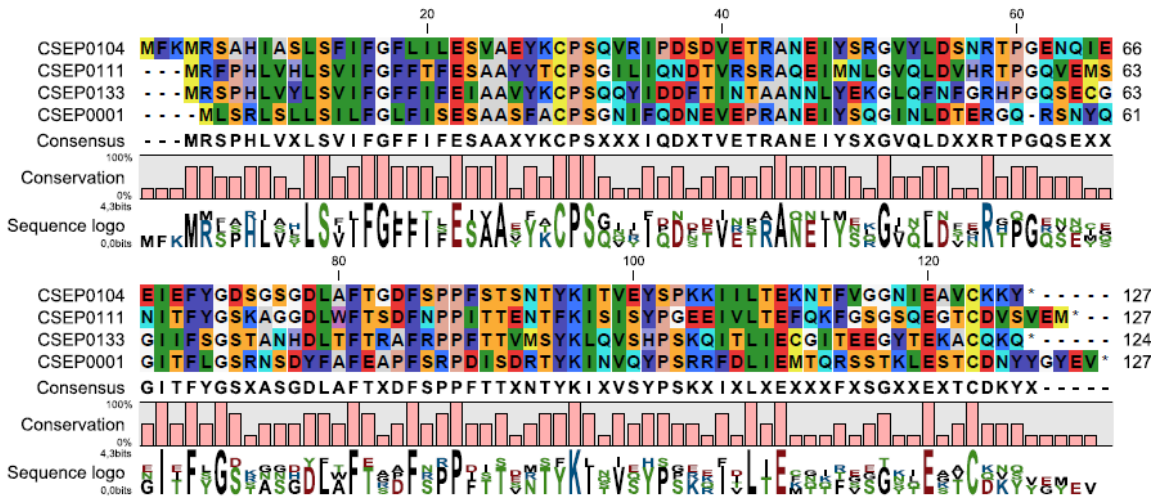

## CSEP family 25.

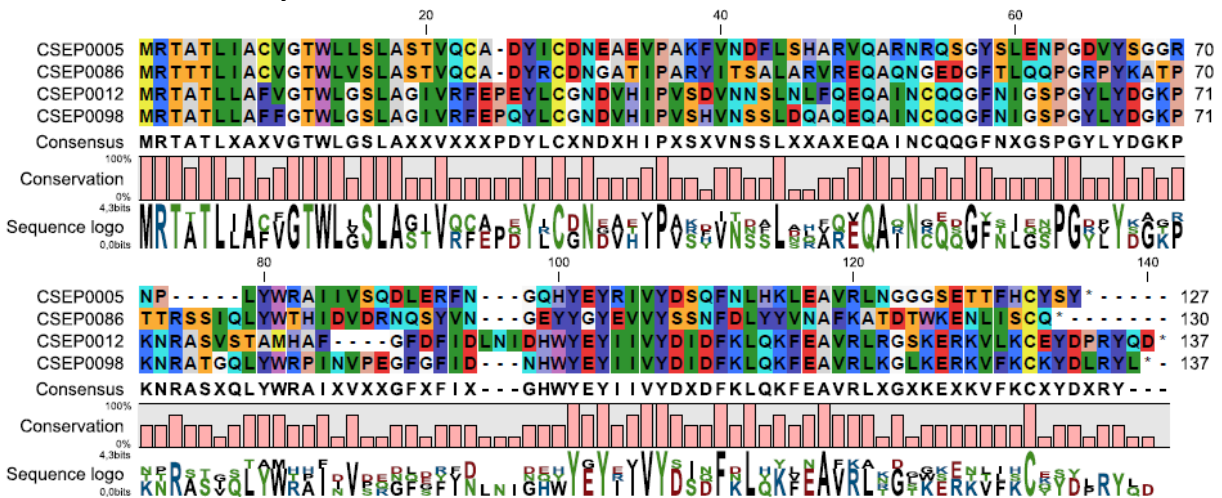

# CSEP family 26.

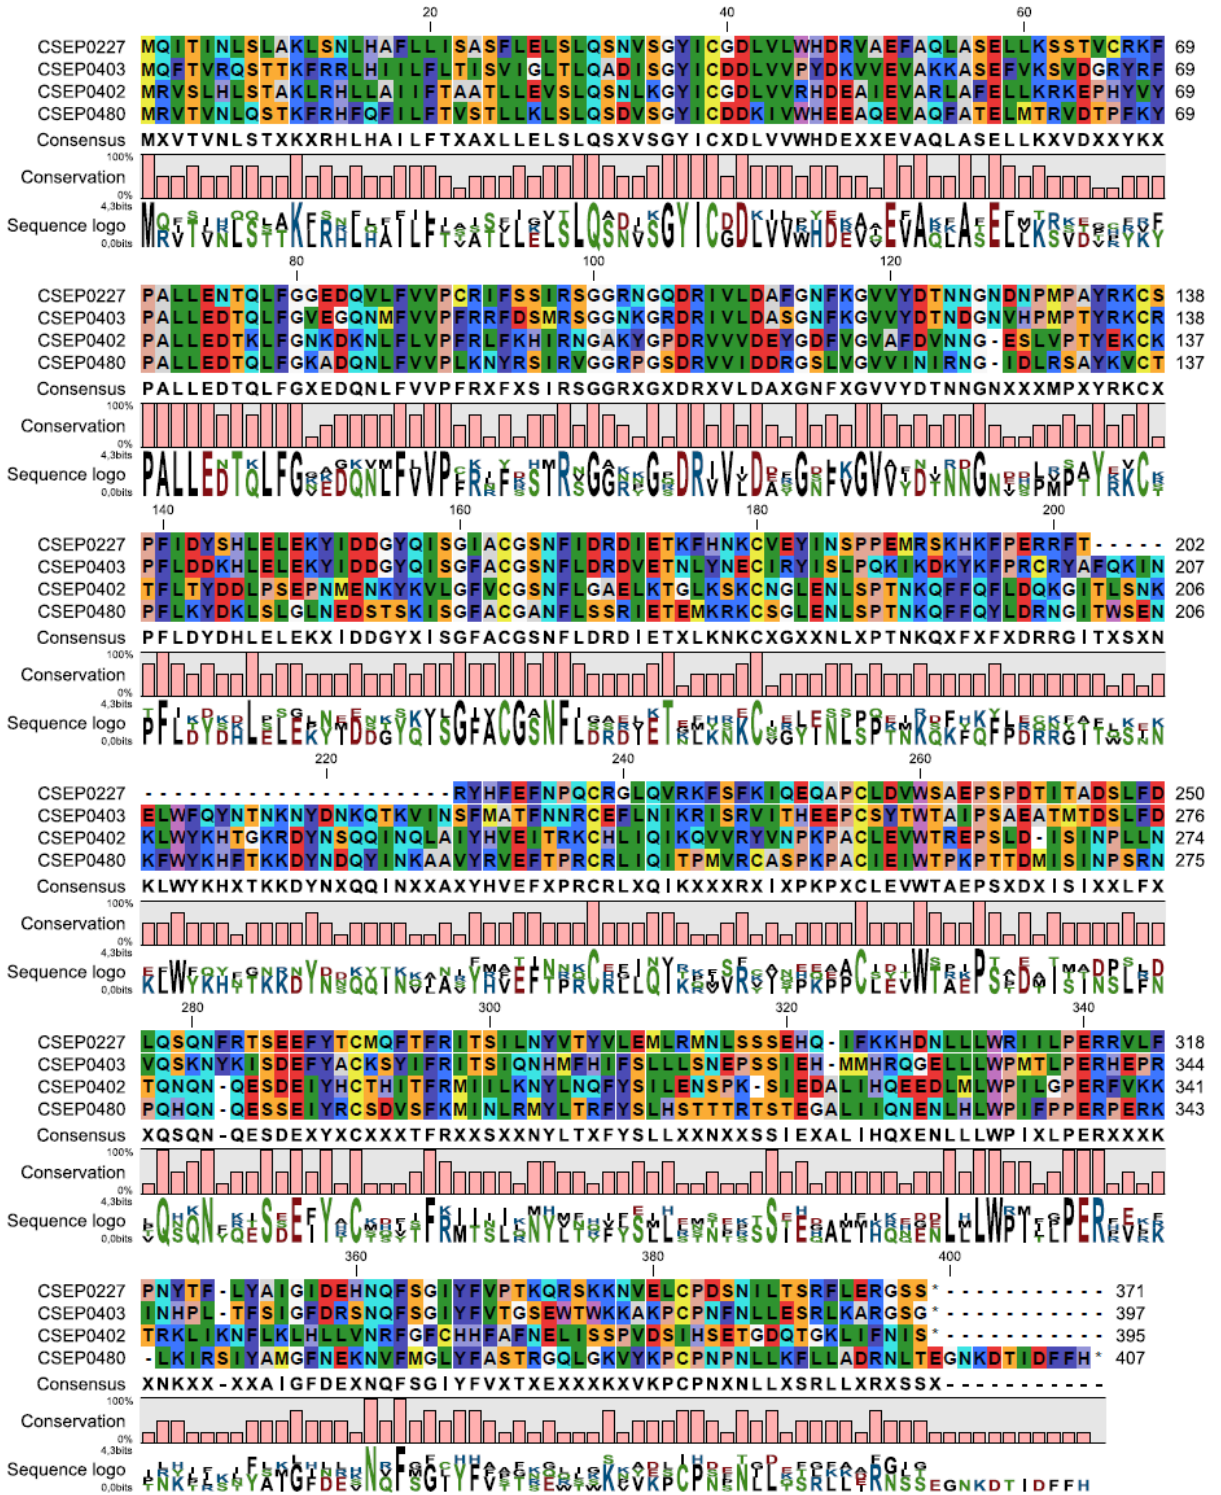

# CSEP family 27.

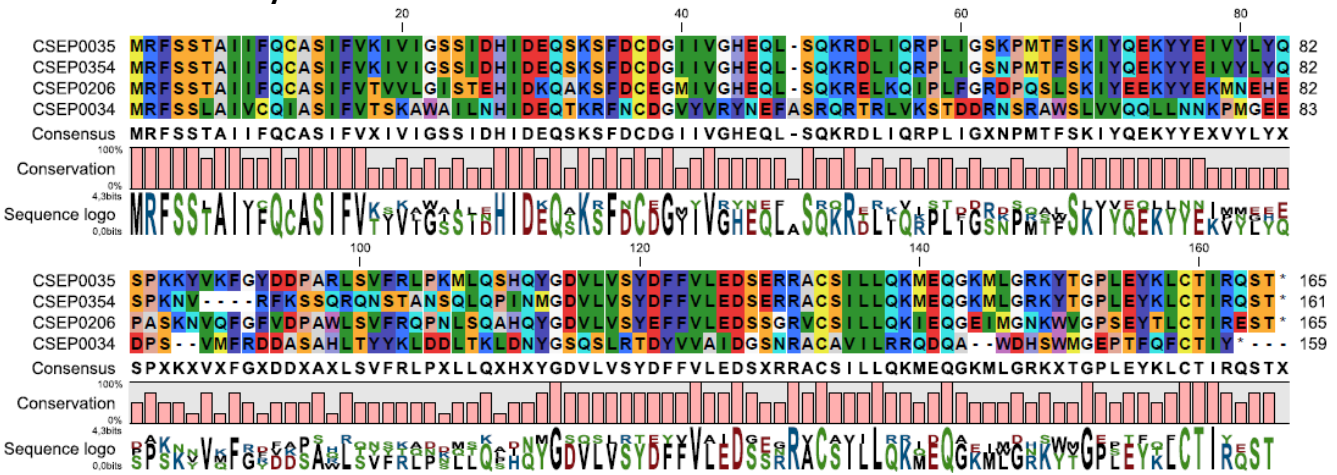

# CSEP family 28.

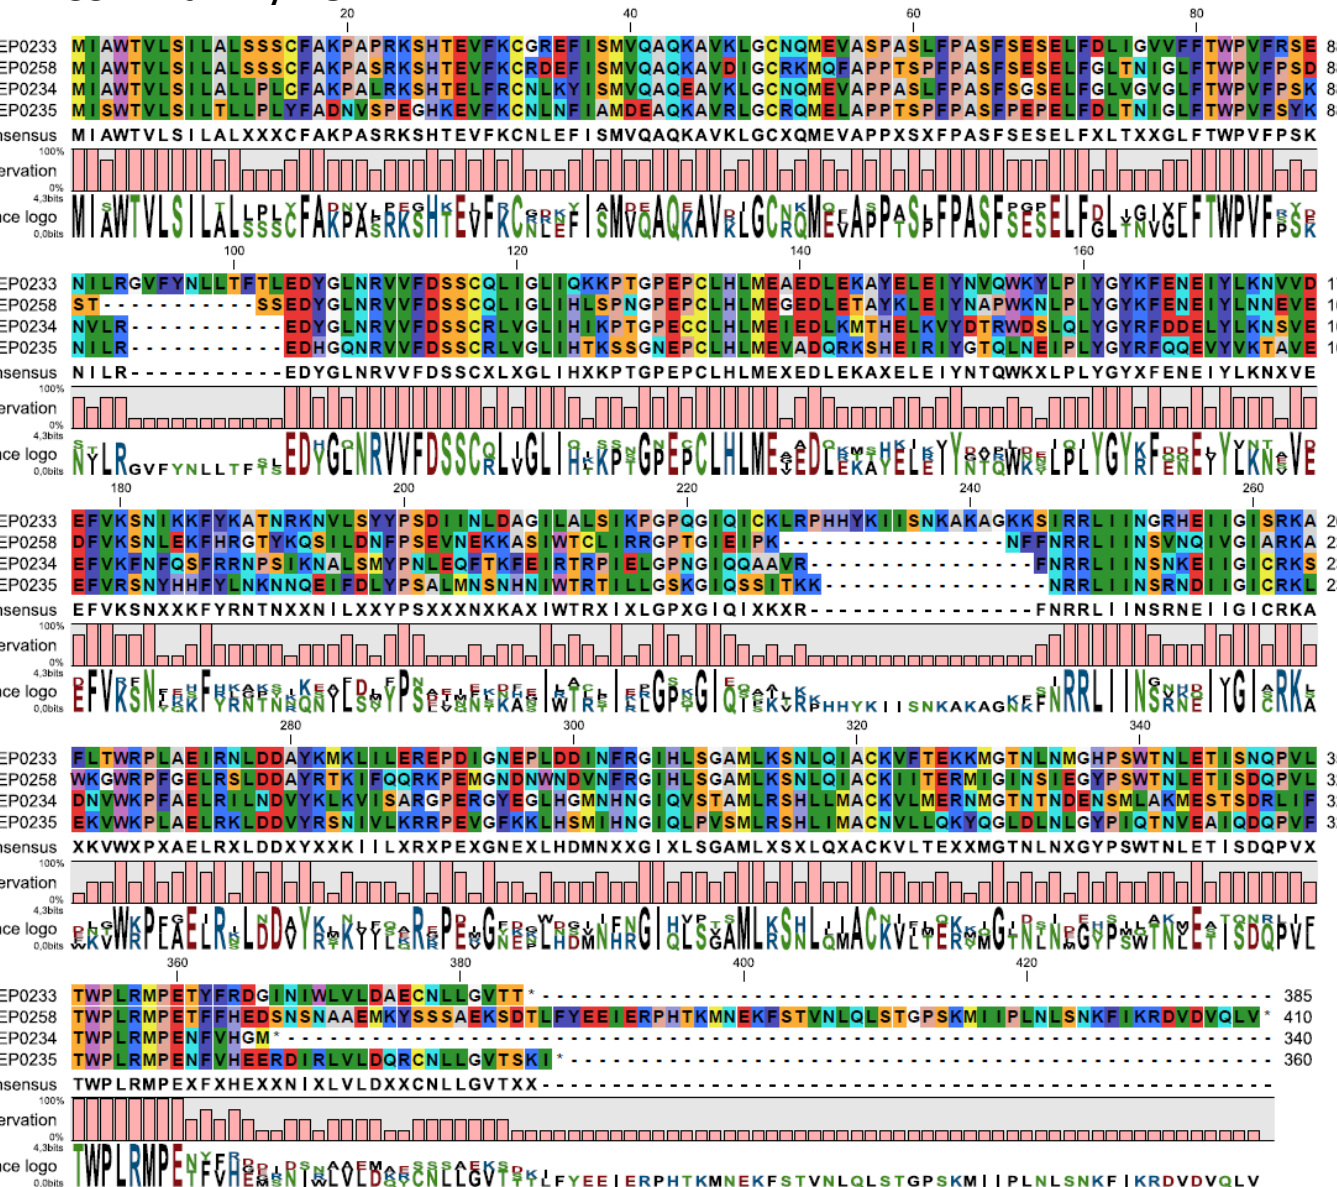

## CSEP family 29.

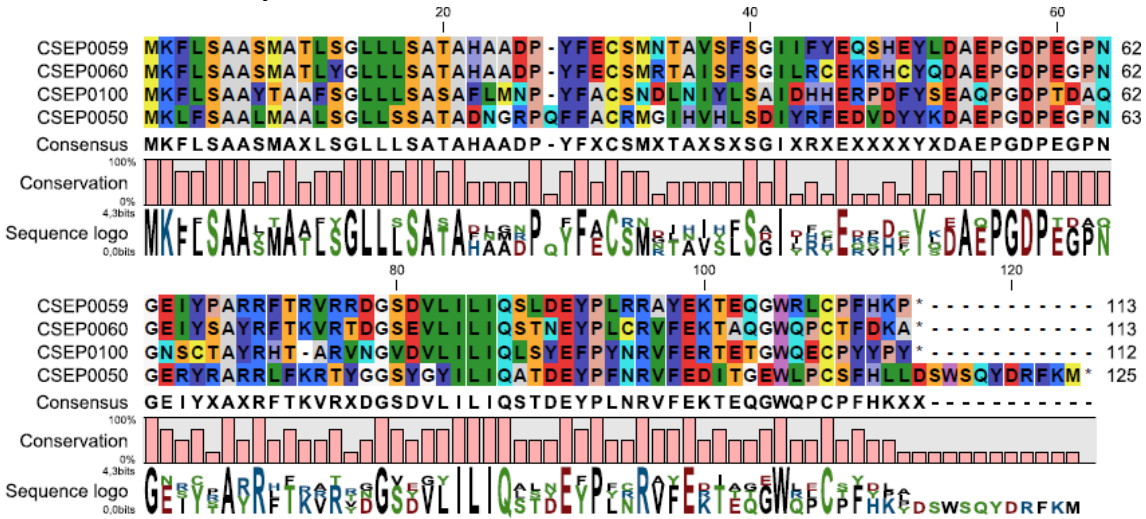

## CSEP family 30.

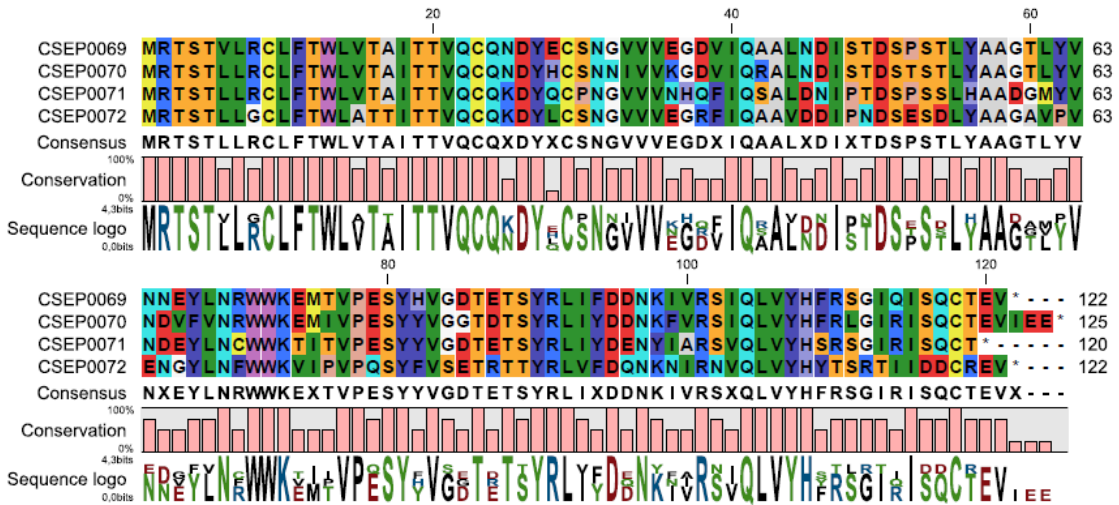

## CSEP family 31.

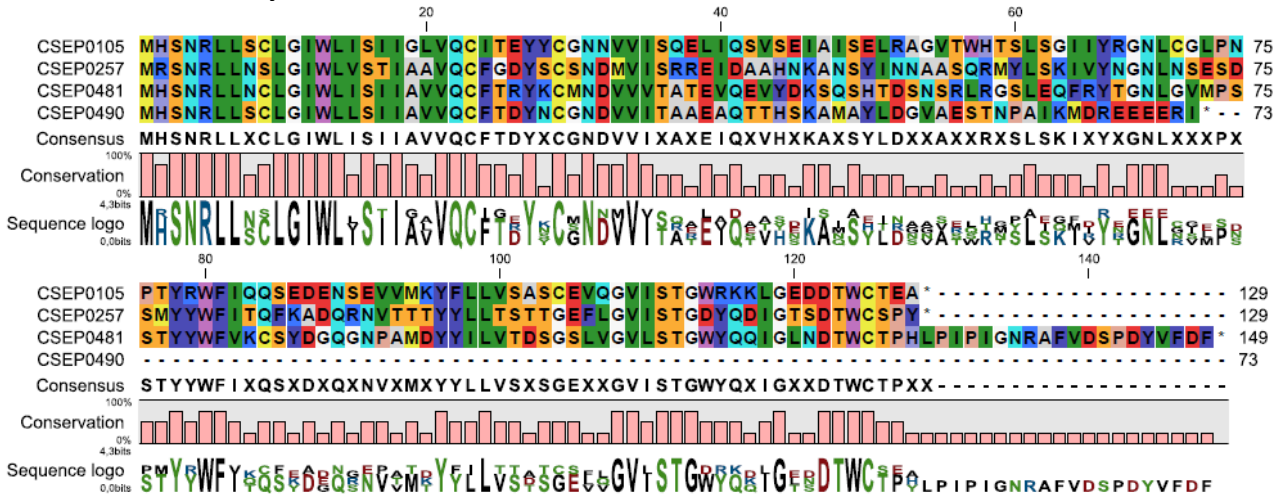

## CSEP family 32.

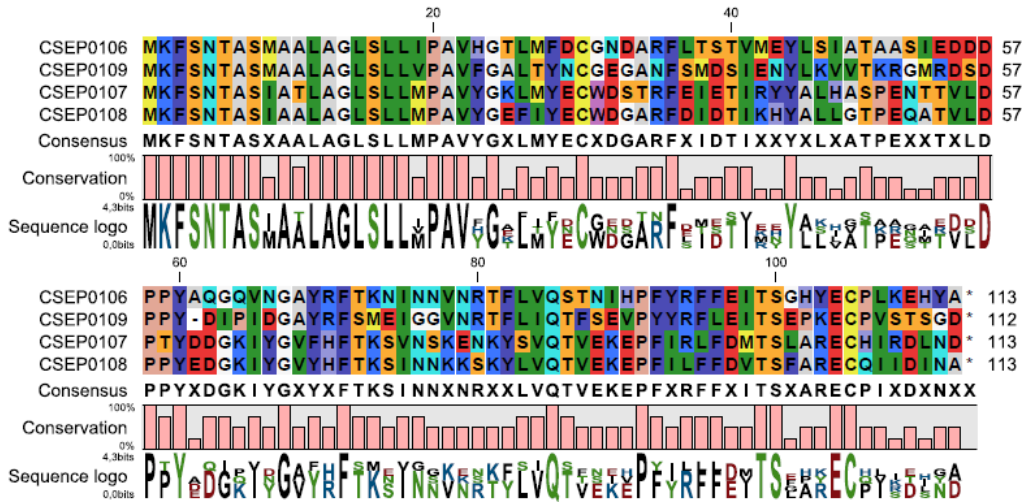

## CSEP family 33.

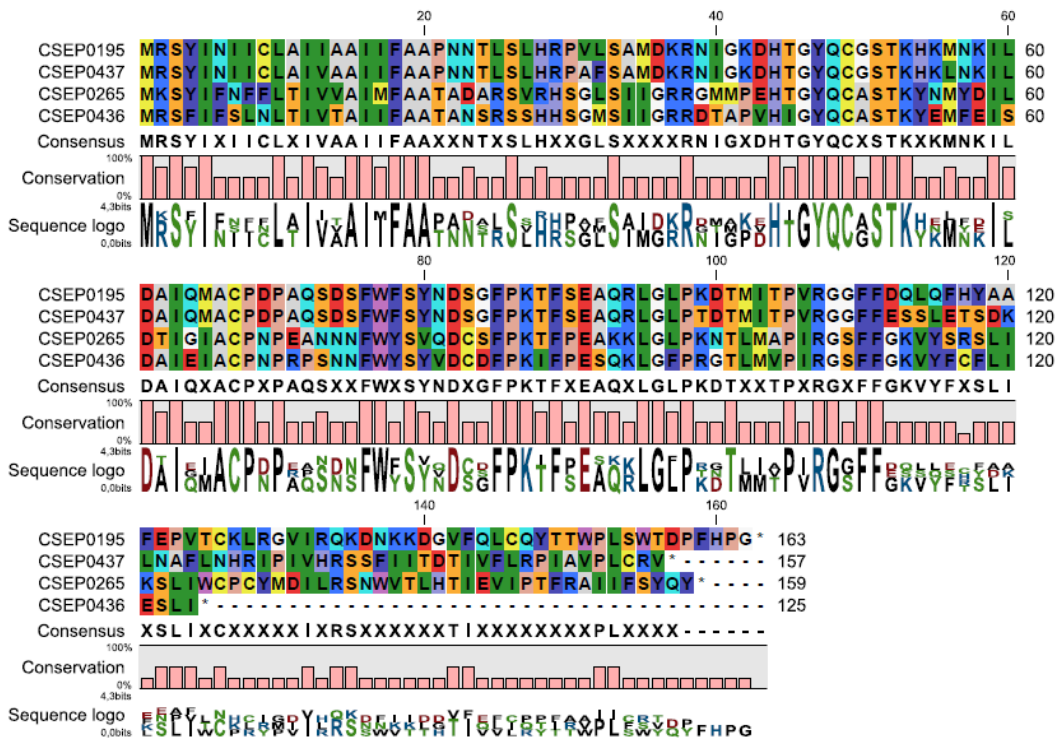

# CSEP family 34.

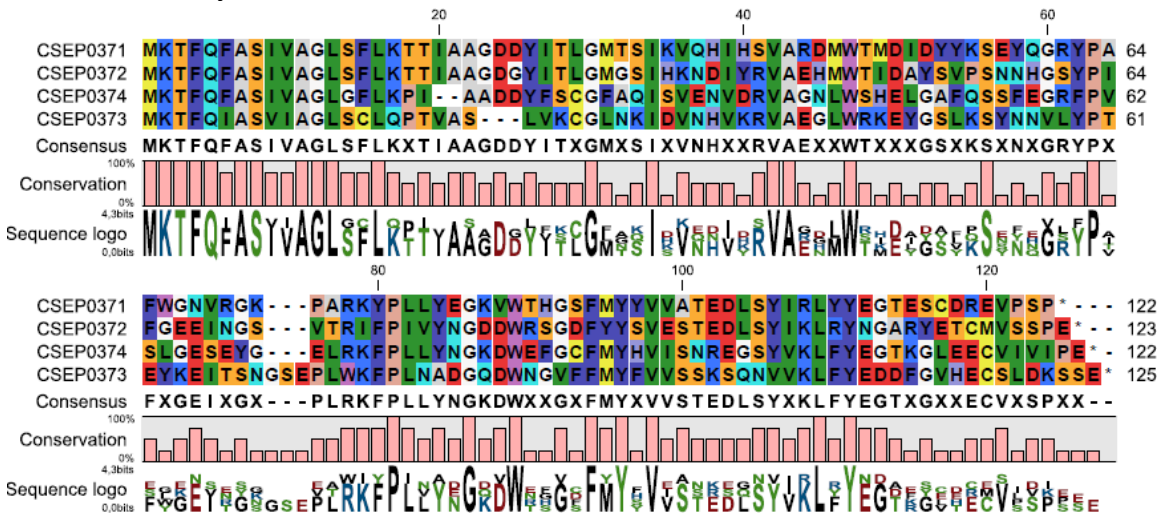

# CSEP family 35.

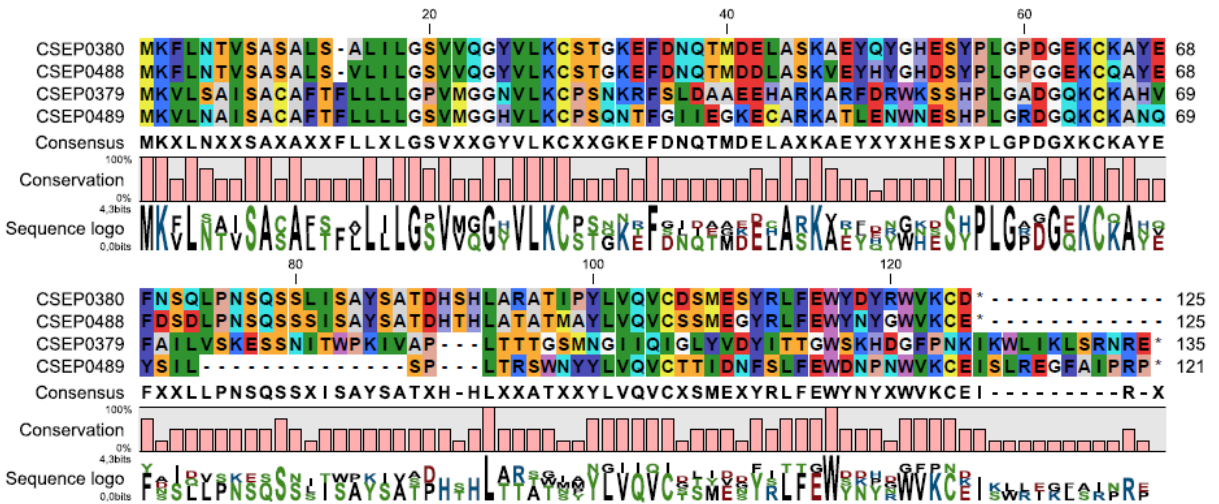

Supplement: 1471-2164-13-694-S14.pdf [file 1471-2164-13-694-S14.pdf]
