# Supplementary material for: Structure and evolution of barley powdery mildew effector candidates
Source: PubMed Central journal article supplement (PMC3582587; doi:10.1186/1471-2164-13-694), 2012-12-11
Supplement: 1471-2164-13-694-S3.pdf [file 1471-2164-13-694-S3.pdf]

### Additional file 3

| Families of paralogs |                   | YxC motif and cysteines |                                |                                   | Length                               | RNA-exp.                                    | Protein-exp.                                      | Modified Nei-Gojobori-method for selection <sup>7)</sup> |            |                          |                           | Selecton-server results <sup>8)</sup> |                                   |                     | Ka/Ks based on Liberles (2001) <sup>9)</sup> |                          |
|----------------------|-------------------|-------------------------|--------------------------------|-----------------------------------|--------------------------------------|---------------------------------------------|---------------------------------------------------|----------------------------------------------------------|------------|--------------------------|---------------------------|---------------------------------------|-----------------------------------|---------------------|----------------------------------------------|--------------------------|
| Family name          | Number of members | Motif <sup>1)</sup>     | C-term. cysteine <sup>2)</sup> | Conserved cysteines <sup>3)</sup> | Average peptide length <sup>4)</sup> | Haustoria/Epiphytic Exp-ratio <sup>5)</sup> | Preference for haustoria expression <sup>6)</sup> | Z-test pair-wise                                         |            | Z-test overall           |                           | Codons under positive selection       | M8 versus M8a-model test P-values | Average Ka/Ks-value | Branches with Ka/Ks>1 / total branches       | Average Ka/Ks if Ka/Ks>1 |
|                      |                   |                         |                                |                                   |                                      |                                             |                                                   | Positive                                                 | Purifying  | Positive P-value/(dN-dS) | Purifying P-value/(dS-dN) |                                       |                                   |                     |                                              |                          |
| 1                    | 59                |                         | no                             | 3                                 | 326                                  | 15                                          | 5                                                 | 18 / 1711                                                | 657 / 1711 | 1,000 / -2,903           | 0,001 / 3,059             | 21 / 397                              | 0,01                              | 0,68                | 8 / 116                                      | 1,38                     |
| 2                    | 32                | FxC                     | no                             | 4                                 | 396                                  | 6                                           | 0                                                 | 3 / 496                                                  | 249 / 496  | 1,000 / -3,987           | 0,000 / 5,644             | 14 / 412                              | 0,001                             | 0,73                | 15 / 62                                      | 1,15                     |
| 3                    | 20                | F/YxC                   | no                             | 10                                | 384                                  | 6                                           | 0                                                 | 0 / 190                                                  | 133 / 190  | 1,000 / -6,200           | 0,000 / 6,125             | 5 / 411                               | 0,001                             | 0,70                | 5 / 38                                       | 1,23                     |
| 4                    | 19                | FxC                     | yes (4-14)                     | 2                                 | 153                                  | 58                                          | 16                                                | 8 / 171                                                  | 29 / 171   | 1,000 / -1,626           | 0,058 / 1,584             | 18 / 163                              | 0,001                             | 1,20                | 10 / 36                                      | 1,56                     |
| 5                    | 15                | F/Y/(H)xC               | no                             | 2                                 | 107                                  | 94                                          | 13                                                | 9 / 105                                                  | 17 / 105   | 1,000 / -1,069           | 0,121 / 1,177             | 20 / 125                              |                                   | 1,41                | 9 / 28                                       | 2,07                     |
| 6                    | 10                | YxC                     | yes (1-9)                      | 4                                 | 311                                  | 21                                          | 50                                                | 1 / 45                                                   | 25 / 45    | 1,000 / -3,216           | 0,000 / 3,211             | 45 / 427                              | 0,001                             | 1,04                | 0 / 18                                       |                          |
| 7                    | 10                |                         | no                             | none                              | 131                                  | 3                                           | 0                                                 | 1 / 45                                                   | 23 / 45    | 1,000 / -3,150           | 0,000 / 3,309             | none                                  | no test                           | 0,62                | 4 / 18                                       | 2,67                     |
| 8                    | 8                 | YxC                     | yes (4)                        | 2                                 | 118                                  | 25                                          | 0                                                 | 11 / 28                                                  | 0 / 28     | 0,034 / 1,845            | 1,000 / -1,608            | 28 / 115                              | 0,001                             | 1,80                | 11 / 14                                      | 1,72                     |
| 9                    | 8                 |                         | no                             | none                              | 178                                  | 16                                          | 0                                                 | 0 / 21                                                   | 14 / 21    | 1,000 / -4,978           | 0,000 / 5,314             | none                                  | no test                           | 0,52                | 0 / 12                                       |                          |
| 10                   | 7                 | FxC                     | no                             | 2                                 | 160                                  | 37                                          | 57                                                | 1 / 21                                                   | 5 / 21     | 1,000 / -0,957           | 0,189 / 0,883             | 5 / 161                               |                                   | 1,31                | 5 / 12                                       | 1,24                     |
| 11                   | 7                 |                         | no                             | 2                                 | 164                                  | 0                                           | 0                                                 | 0 / 21                                                   | 12 / 21    | 1,000 / -3,529           | 0,0001 / 3,205            | 3 / 171                               | no test                           | 0,92                | 2 / 12                                       | 1,18                     |
| 12                   | 7                 | F/YxC                   | yes (10)                       | 2                                 | 125                                  | 207                                         | 0                                                 | 5 / 21                                                   | 3 / 21     | 1,000 / -0,121           | 0,457 / 0,108             | 11 / 129                              | 0,001                             | 1,19                | 7 / 12                                       | 1,75                     |
| 13                   | 7                 | F/Y/(H)xC               | yes (4)                        | 2                                 | 123                                  | 30                                          | 14                                                | 9 / 21                                                   | 0 / 21     | 0,003 / 2,830            | 1,000 / -3,243            | 12 / 126                              | 0,001                             | 1,69                | 8 / 12                                       | 2,17                     |
| 14                   | 7                 | YxC                     | no                             | 2                                 | 127                                  | 0                                           | 0                                                 | 0 / 21                                                   | 13 / 21    | 1,000 / -4,601           | 0,000 / 5,108             | none                                  | no test                           | 0,50                | 2 / 12                                       | 1,86                     |
| 15                   | 7                 | YxC                     | no                             | 4                                 | 310                                  | 3                                           | 0                                                 | 1 / 21                                                   | 10 / 21    | 1,000 / -2,872           | 0,003 / 2,763             | 0 / 303                               | 0,01                              | 0,82                | 3 / 12                                       | 1,77                     |
| 16                   | 6                 | FxC                     | no                             | 2                                 | 144                                  | 55                                          | 0                                                 | 2 / 15                                                   | 0 / 15     | 1,000 / -0,023           | 0,489 / 0,027             | 14 / 159                              | 0,001                             | 1,59                | 2 / 10                                       | 4,15                     |
| 17                   | 6                 | F/YxC                   | no                             | 5                                 | 395                                  | 11                                          | 0                                                 | 0 / 15                                                   | 7 / 15     | 1,000 / -3,819           | 0,000 / 3,753             | none                                  | no test                           | 0,56                | 0 / 10                                       |                          |
| 18                   | 6                 |                         | no                             | 2                                 | 153                                  | 74                                          | 50                                                | 0 / 15                                                   | 1 / 15     | 1,000 / -0,226           | 0,407 / 0,235             | 4 / 183                               | 0,001                             | 0,97                | 1 / 10                                       | 1,10                     |
| 19                   | 5                 | F/YxC                   | yes (4)                        | 2                                 | 115                                  | 87                                          | 0                                                 | 1 / 10                                                   | 1 / 10     | 1,000 / -1,259           | 0,128 / 1,139             | 0 / 112                               | not significant                   | 0,93                | 3 / 8                                        | 2,56                     |
| 20                   | 5                 | FxC                     | yes (4)                        | 2                                 | 128                                  | 168                                         | 0                                                 | 0 / 10                                                   | 1 / 10     | 1,000 / -1,208           | 0,121 / 1,175             | 0 / 130                               | 0,05                              | 0,92                | 3 / 8                                        | 1,23                     |
| 21                   | 5                 | WxC                     | yes (6)                        | 2                                 | 118                                  | 156                                         | 20                                                | 9 / 10                                                   | 0 / 10     | 0,000 / 4,605            | 1,000 / -3,928            | 11 / 118                              | 0,001                             | 2,76                | 8 / 8                                        | 2,53                     |
| 22                   | 5                 | YxC                     | yes (4)                        | 2                                 | 105                                  | 31                                          | 20                                                | 2 / 10                                                   | 0 / 10     | 0,298 / 0,532            | 1,000 / -0,532            | 13 / 112                              | 0,001                             | 2,00                | 2 / 8                                        | 2,16                     |
| 23                   | 5                 | YxC                     | yes (4)                        | 2                                 | 107                                  | 197                                         | 20                                                | 8 / 10                                                   | 0 / 10     | 0,000 / 4,624            | 1,000 / -4,660            | 16 / 106                              |                                   | 2,61                | 7 / 8                                        | 1,95                     |
| 24                   | 4                 | F/YxC                   | yes (1-2)                      | 2                                 | 125                                  | 403                                         | 50                                                | 1 / 6                                                    | 1 / 6      | 1,000 / -0,415           | 0,308 / 0,503             | 0 / 126                               |                                   | 0,80                | 1 / 6                                        | 1,29                     |
| 25                   | 4                 | YxC                     | yes (3-9)                      | 2                                 | 132                                  | 168                                         | 25                                                | 3 / 6                                                    | 0 / 6      | 0,006 / 2,573            | 1,000 / -2,822            | 7 / 136                               | 0,001                             | 1,56                | 6 / 6                                        | 1,36                     |
| 26                   | 4                 | YxC                     | yes (6)                        | 8                                 | 392                                  | 6                                           | 0                                                 | 0 / 6                                                    | 3 / 6      | 1,000 / -2,699           | 0,004 / 2,738             | 0 / 396                               | not significant                   | 0,68                | 0 / 6                                        |                          |
| 27                   | 4                 | F/YxC                   | no                             | 3                                 | 162                                  | 10                                          | 0                                                 | 0 / 6                                                    | 0 / 6      | 1,000 / -0,437           | 0,363 / 0,352             | 0 / 158                               | not significant                   | 0,90                | 1 / 6                                        | 1,01                     |
| 28                   | 4                 | FxC                     | no                             | 5                                 | 373                                  | 5                                           | 0                                                 | 0 / 6                                                    | 6 / 6      | 1,000 / -3,732           | 0,000 / 3,502             | 0 / 339                               | 0,001                             | 0,83                | 0 / 6                                        |                          |
| 29                   | 4                 | FxC                     | yes (5-7)                      | 2                                 | 115                                  | 67                                          | 0                                                 | 3 / 6                                                    | 0 / 6      | 0,006 / 2,561            | 1,000 / -2,451            | 15 / 112                              | 0,001                             | 2,09                | 5 / 6                                        | 2,48                     |
| 30                   | 4                 | YxC                     | yes (4)                        | 3                                 | 121                                  | 101                                         | 75                                                | 4 / 6                                                    | 0 / 6      | 0,003 / 2,793            | 1,000 / -3,303            | 26 / 124                              |                                   | 2,45                | 6 / 6                                        | 4,80                     |
| 31                   | 4                 | YxC                     | yes (4-7)                      | 2                                 | 119                                  | 141                                         | 25                                                | 0 / 6                                                    | 1 / 6      | 1,000 / -2,055           | 0,020 / 2,087             | 9 / 128                               |                                   | 1,37                | 1 / 6                                        | 1,15                     |
| 32                   | 4                 | F/YxC                   | yes (4)                        | 2                                 | 112                                  | 168                                         | 0                                                 | 2 / 6                                                    | 0 / 6      | 0,035 / 1,825            | 1,000 / -2,030            | 4 / 112                               | 0,01                              | 1,35                | 5 / 6                                        | 4,11                     |
| 33                   | 4                 | YxC                     | no                             | 2                                 | 150                                  | 0                                           | 0                                                 | 0 / 6                                                    | 5 / 6      | 1,000 / -4,262           | 0,000 / 4,647             | 1 / 162                               | 0,001                             | 1,03                | 0 / 6                                        |                          |
| 34                   | 4                 |                         | no                             | none                              | 122                                  | 369                                         | 25                                                | 1 / 6                                                    | 0 / 6      | 0,070 / 1,488            | 1,000 / -1,360            | 12 / 121                              | 0,001                             | 1,68                | 3 / 6                                        | 1,97                     |
| 35                   | 4                 |                         | no                             | 4                                 | 126                                  | not calculated                              | 25                                                | 0 / 6                                                    | 0 / 6      | 1,000 / -0,397           | 0,352 / 0,382             | 0 / 124                               | 0,05                              | 1,07                | 3 / 6                                        | 1,41                     |
| 36                   | 3                 |                         | no                             | 4                                 | 139                                  | 62                                          | 0                                                 | 0 / 3                                                    | 2 / 3      | 1,000 / -1,545           | 0,057 / 1,588             | not tested                            |                                   |                     | 0 / 4                                        |                          |
| 37                   | 3                 |                         | no                             | 3                                 | 319                                  | 5                                           | 0                                                 | 0 / 3                                                    | 2 / 3      | 1,000 / -2,639           | 0,006 / 2,528             | not tested                            |                                   |                     | 1 / 4                                        | 1,72                     |
| 38                   | 3                 |                         | no                             | 3                                 | 337                                  | 26                                          | 0                                                 | 0 / 3                                                    | 0 / 3      | 1,000 / -0,318           | 0,377 / 0,313             | not tested                            |                                   |                     | 1 / 4                                        | 1,48                     |
| 39                   | 3                 | FxC                     | no                             | 1                                 | 333                                  | 6                                           | 0                                                 | 0 / 3                                                    | 2 / 3      | 1,000 / -3,417           | 0,000 / 3,404             | not tested                            |                                   |                     | 0 / 4                                        |                          |
| 40                   | 3                 | FxC                     | no                             | 2                                 | 152                                  | 43                                          | 0                                                 | 0 / 3                                                    | 0 / 3      | 1,000 / -0,962           | 0,131 / 1,125             | not tested                            |                                   |                     | 2 / 4                                        | 1,27                     |
| 41                   | 3                 | Y/FxC                   | yes (3-4)                      | 2                                 | 118                                  | 302                                         | 33                                                | 0 / 3                                                    | 1 / 3      | 1,000 / -2,174           | 0,021 / 2,057             | not tested                            |                                   |                     | 0 / 4                                        |                          |
| 42                   | 3                 | FxC                     | no                             | 3                                 | 144                                  | 8                                           | 0                                                 | 1 / 3                                                    | 0 / 3      | 0,018 / 2,126            | 1,000 / -2,076            | not tested                            |                                   |                     | 4 / 4                                        | 1,47                     |
| 43                   | 3                 | F/YxC                   | yes (1-4)                      | 2                                 | 124                                  | 182                                         | 33                                                | 0 / 3                                                    | 3 / 3      | 1,000 / -4,233           | 0,000 / 4,328             | not tested                            |                                   |                     | 0 / 4                                        |                          |
| 44                   | 3                 | YxC                     | yes (4)                        | 2                                 | 114                                  | 312                                         | 100                                               | 2 / 3                                                    | 0 / 3      | 0,001 / 3,362            | 1,000 / -3,177            | not tested                            |                                   |                     | 3 / 4                                        | 1,68                     |
| 45                   | 3                 | F/YxC                   | yes (3)                        | 2                                 | 104                                  | 221                                         | 100                                               | 0 / 3                                                    | 0 / 3      | 1,000 / -0,120           | 1,000 / -0,109            | not tested                            |                                   |                     | 1 / 4                                        | 1,12                     |
| 46                   | 3                 | F/YxC                   | yes (3-4)                      | 2                                 | 112                                  | 211                                         | 0                                                 | 2 / 3                                                    | 0 / 3      | 0,019 / 2,105            | 1,000 / -2,083            | not tested                            |                                   |                     | 1 / 4                                        | 2,86                     |
| 47                   | 3                 | FxC                     | yes (1-3)                      | 8                                 | 197                                  | 141                                         | 67                                                | 0 / 3                                                    | 1 / 3      | 1,000 / -2,338           | 0,006 / 2,541             | not tested                            |                                   |                     | 1 / 4                                        | 1,01                     |
| 48                   | 3                 | F/YxC                   | no                             | 5                                 | 183                                  | 7                                           | 0                                                 | 0 / 3                                                    | 2 / 3      | 1,000 / -1,997           | 0,015 / 2,202             | not tested                            |                                   |                     | 1 / 4                                        | 1,15                     |
| 49                   | 3                 | YxC                     | yes (4)                        | 2                                 | 118                                  | 100                                         | 0                                                 | 1 / 3                                                    | 0 / 3      | 0,036 / 1,812            | 1,000 / -1,626            | not tested                            |                                   |                     | 2 / 4                                        | 1,70                     |
| 50                   | 3                 | YxC                     | yes (4)                        | 2                                 | 102                                  | 21                                          | 0                                                 | 3 / 3                                                    | 0 / 3      | 0,001 / 3,248            | 1,000 / -3,159            | not tested                            |                                   |                     | 3 / 4                                        | 3,32                     |
| 51                   | 3                 | F/YxC                   | no                             | 2                                 | 156                                  | 8                                           | 0                                                 | 0 / 3                                                    | 1 / 3      | 1,000 / -1,542           | 0,066 / 1,515             | not tested                            |                                   |                     | 0 / 4                                        |                          |
| 52                   | 3                 | YxC                     | no                             | 3                                 | 157                                  | 0                                           | 0                                                 | 0 / 3                                                    | 2 / 3      | 1,000 / -4,729           | 0,000 / 4,299             | not tested                            |                                   |                     | 0 / 4                                        |                          |
| 53                   | 3                 |                         | no                             | 3                                 | 268                                  | 6                                           | 0                                                 | 0 / 3                                                    | 3 / 3      | 1,000 / -5,529           | 0,000 / 5,529             | not tested                            |                                   |                     | 0 / 4                                        |                          |

### Additional file 3

|    |   |       |         |      |     |     |     |       |       |                |                |            |  |  |            |      |
|----|---|-------|---------|------|-----|-----|-----|-------|-------|----------------|----------------|------------|--|--|------------|------|
| 54 | 3 |       | no      | 4    | 196 | 35  | 33  | 0 / 3 | 2 / 3 | 1,000 / -3,193 | 0,005 / 2,646  | not tested |  |  | 0 / 4      |      |
| 55 | 3 |       | no      | 4    | 272 | 8   | 0   | 0 / 3 | 0 / 3 | 1,000 / -0,160 | 0,441 / 0,149  | not tested |  |  | 1 / 4      | 1,03 |
| 56 | 2 | FxC   | no      | 4    | 161 | 21  | 0   |       |       | 0,214 / 0,796  | 1,000 / -0,814 | not tested |  |  | not tested |      |
| 57 | 2 | ½     | no      | 4    | 188 | 0   | 0   |       |       | 1,000 / -4,041 | 0,000 / 3,904  | not tested |  |  | not tested |      |
| 58 | 2 |       | no      | none | 159 | 0   | 0   |       |       | 1,000 / -6,951 | 0,000 / 7,163  | not tested |  |  | not tested |      |
| 59 | 2 | F/YxC | yes (4) | 2    | 137 | 152 | 0   |       |       | 0,113 / 1,218  | 1,000 / -1,050 | not tested |  |  | not tested |      |
| 60 | 2 | YxC   | no      | 2    | 131 | 43  | 100 |       |       | 1,000 / -1,998 | 0,027 / 1,944  | not tested |  |  | not tested |      |
| 61 | 2 | WxC   | yes (3) | 2    | 117 | 199 | 50  |       |       | 0,034 / 1,844  | 1,000 / -1,728 | not tested |  |  | not tested |      |
| 62 | 2 | ½     | no      | 1    | 149 | 17  | 0   |       |       | 1,000 / -1,093 | 0,161 / 0,995  | not tested |  |  | not tested |      |
| 63 | 2 | ½     | yes (4) | 1    | 101 | 159 | 50  |       |       | 0,231 / 0,737  | 1,000 / -0,734 | not tested |  |  | not tested |      |
| 64 | 2 | WxC   | yes (3) | 3    | 114 | 88  | 100 |       |       | 0,000 / 3,384  | 1,000 / -3,651 | not tested |  |  | not tested |      |
| 65 | 2 | YxC   | yes (4) | 1    | 107 |     | 0   |       |       | 0,001 / 3,322  | 1,000 / -3,699 | not tested |  |  | not tested |      |
| 66 | 2 | YxC   | yes (2) | 3    | 111 |     | 0   |       |       | 1,000 / -1,159 | 0,143 / 1,070  | not tested |  |  | not tested |      |
| 67 | 2 |       | no      | 4    | 144 |     | 50  |       |       | 0,072 / 1,470  | 1,000 / -1,446 | not tested |  |  | not tested |      |
| 68 | 2 |       | no      | none | 121 |     | 0   |       |       | 1,000 / -2,740 | 0,005 / 2,628  | not tested |  |  | not tested |      |
| 69 | 2 |       | no      | 3    | 213 |     | 0   |       |       | 0,417 / 0,211  | 1,000 / -0,195 | not tested |  |  | not tested |      |
| 70 | 2 |       | no      | none | 121 |     | 0   |       |       | 0,453 / 0,117  | 1,000 / -0,140 | not tested |  |  | not tested |      |
| 71 | 2 |       | no      | 2    | 188 |     | 0   |       |       | 1,000 / -1,130 | 0,130 / 1,131  | not tested |  |  | not tested |      |
| 72 | 2 | ½     | no      | 6    | 179 |     | 0   |       |       | 1,000 / -3,908 | 0,000 / 3,691  | not tested |  |  | not tested |      |

Positive select. Purifying select.

- 1) Indicates if the family has the YxC-motif in the N-term. of the mature protein. The symbol ½ indicates that some members have and others do not have.
- 2) The presence of a cysteine close to C-terminal and the distance to the C-terminal
- 3) Conserved Cysteines are in the mature protein. In some cases there are a few members which are truncated and therefore missing the terminal cysteine, but in the table is counted anyway
- 4) Length of proteins: The average length of the proteins were calculated for each family. If the average length was below 150 AA, it was coloured light green, if the average length was more than 300 it was coloured grey
- 5) Gene expression ratio in haustoria-samples versus epiphytic samples and calculated as averages for each family. Colour codes: Orange: >100x, yellow: 50-100x, light yellow: 10-50x
- 6) Percentages of CSEPs in each family found only in haustoria samples by proteome analysis. Yellow indicate more than 20%
- 7) Codon-based Test of Positive and Purifying Selection. The two left columns show the numbers of pairs with significant positive selection (z-tests at 5% level) compared to total number of pairs within each family. The two right columns show the values of P less than 0.05 are considered significant at the 5% level (modified Nei-Gojobori (assumed transition/transversion bias = 1))  
The test statistic (dN - dS) and (dS - dN) are shown for positive and purifying selection respectively. dS and dN are the numbers of synonymous and nonsynonymous substitutions per site, respectively.
- 8) Codon-based calculations of positive and purifying selection using the Selecton-server and based on a Bayesian inference approach (Doron-Faigenboim et al. 2005).  
Left column indicate the number of codons under positive or purifying selection.  
The middle column shows the significant levels of Model M8a versus model M8.  
The right column shows the average Ka/Ks-values calculated on the mature proteins. Pink: Purifying selection Ka/Ks < 0,75, Yellow - orange: Positive selection, stronger colour means stronger positive selection
- 9) Ka/Ks-value based on method 7 of Liberles (2001) and calculated by service at Bergen Center for Computational Science <http://services.cbu.uib.no/tools/kaks>.  
The Ka/Ks-values are calculated on each branch point on a calculated phylogenetic tree
