# Supplementary material for: Structure and evolution of barley powdery mildew effector candidates
Source: PubMed Central journal article supplement (PMC3582587; doi:10.1186/1471-2164-13-694), 2012-12-11
Supplement: 1471-2164-13-694-S7.pdf [file 1471-2164-13-694-S7.pdf]

## Additional File 7.

Seventy two CSEPs that show a relationship to ribonucleases as identified by either InterProScan analysis for identification of functional domains or by structural annotation through analysis of structural templates from IntFOLD predictions.

| <b>CSEP ID</b> | <b>Family</b> | <b>InterProScan</b>   | <b>Structural annotation</b> |
|----------------|---------------|-----------------------|------------------------------|
| CSEP0003       | 2             | ribonuclease activity |                              |
| CSEP0006       | 2             | ribonuclease activity | Ribonuclease Ms              |
| CSEP0009       | 2             | ribonuclease activity |                              |
| CSEP0010       | 2             | ribonuclease activity |                              |
| CSEP0011       | 2             | ribonuclease activity | Ribonuclease U2              |
| CSEP0019       | 2             | ribonuclease activity |                              |
| CSEP0020       | 2             | ribonuclease activity |                              |
| CSEP0021       | 2             | ribonuclease activity | Ribonuclease T1              |
| CSEP0022       | 2             | ribonuclease activity | Ribonuclease U2              |
| CSEP0023       | 2             | ribonuclease activity | Ribonuclease T1              |
| CSEP0024       | 2             | ribonuclease activity | Ribonuclease T1              |
| CSEP0025       | 2             | ribonuclease activity |                              |
| CSEP0187       | 2             | ribonuclease activity |                              |
| CSEP0243       | 2             | ribonuclease activity |                              |
| CSEP0245       | 2             | ribonuclease activity |                              |
| CSEP0246       | 2             | ribonuclease activity |                              |
| CSEP0247       | 2             | ribonuclease activity |                              |
| CSEP0281       | 2             | ribonuclease activity |                              |
| CSEP0299       | 2             | ribonuclease activity | Ribonuclease T1              |
| CSEP0300       | 2             | ribonuclease activity | Ribonuclease U2              |
| CSEP0314       | 2             | ribonuclease activity |                              |
| CSEP0315       | 2             | ribonuclease activity | Ribonuclease U2              |
| CSEP0316       | 2             | ribonuclease activity | Ribonuclease T1              |
| CSEP0317       | 2             | ribonuclease activity | Ribonuclease Ms              |
| CSEP0318       | 2             | ribonuclease activity |                              |
| CSEP0375       | 2             | ribonuclease activity |                              |
| CSEP0484       | 2             | ribonuclease activity |                              |
| CSEP0038       | 3             | ribonuclease activity |                              |
| CSEP0076       | 3             | ribonuclease activity |                              |
| CSEP0217       | 3             | ribonuclease activity |                              |
| CSEP0218       | 3             | ribonuclease activity |                              |
| CSEP0237       | 3             | ribonuclease activity |                              |
| CSEP0259       | 3             | ribonuclease activity |                              |
| CSEP0348       | 3             | ribonuclease activity |                              |
| CSEP0459       | 3             | ribonuclease activity |                              |
| CSEP0461       | 3             | ribonuclease activity |                              |
| CSEP0462       | 3             | ribonuclease activity |                              |
| CSEP0469       | 3             | ribonuclease activity |                              |
| CSEP0090       | 12            |                       | Ribonuclease U2              |
| CSEP0091       | 12            | ribonuclease activity | Ribonuclease U2              |

|          |    |                       |                 |
|----------|----|-----------------------|-----------------|
| CSEP0092 | 12 | ribonuclease activity | Ribonuclease U2 |
| CSEP0093 | 12 |                       | Ribonuclease Ms |
| CSEP0197 | 12 |                       | Ribonuclease T1 |
| CSEP0416 | 15 | ribonuclease activity |                 |
| CSEP0128 | 16 |                       | Ribonuclease U2 |
| CSEP0129 | 16 |                       | Ribonuclease U2 |
| CSEP0130 | 16 |                       | Ribonuclease U2 |
| CSEP0252 | 17 | ribonuclease activity | Ribonuclease Ms |
| CSEP0389 | 17 | ribonuclease activity |                 |
| CSEP0463 | 17 | ribonuclease activity |                 |
| CSEP0101 | 20 |                       | Ribonuclease T1 |
| CSEP0102 | 20 |                       | Ribonuclease T1 |
| CSEP0064 | 21 |                       | Ribonuclease U2 |
| CSEP0066 | 21 |                       | Ribonuclease T1 |
| CSEP0402 | 26 |                       | Ribonuclease Ms |
| CSEP0480 | 26 | ribonuclease activity |                 |
| CSEP0235 | 28 |                       | Ribonuclease Ms |
| CSEP0027 | 41 |                       | Ribonuclease Ms |
| CSEP0037 | 56 | ribonuclease activity | Ribonuclease U2 |
| CSEP0078 | 56 | ribonuclease activity | Ribonuclease U2 |
| CSEP0140 | 61 |                       | Ribonuclease U2 |
| CSEP0132 | 62 |                       | Ribonuclease T1 |
| CSEP0347 | 62 | ribonuclease activity | Ribonuclease Ms |
| CSEP0475 | 72 | ribonuclease activity |                 |
| CSEP0476 | 72 | ribonuclease activity |                 |
| CSEP0008 |    |                       | Ribonuclease U2 |
| CSEP0017 |    |                       | Ribonuclease T1 |
| CSEP0018 |    | ribonuclease activity | Ribonuclease Ms |
| CSEP0044 |    | ribonuclease activity |                 |
| CSEP0219 |    | ribonuclease activity |                 |
| CSEP0342 |    | ribonuclease activity | Ribonuclease Ms |
| CSEP0344 |    |                       | Ribonuclease U2 |
