# Supplementary material for: Structure and evolution of barley powdery mildew effector candidates
Source: PubMed Central journal article supplement (PMC3582587; doi:10.1186/1471-2164-13-694), 2012-12-11
Supplement: 1471-2164-13-694-S8.pdf [file 1471-2164-13-694-S8.pdf]

### Additional File 8. The *B. graminis* EST sources used for expression evidence of the CSEPs.

A total of almost 52000 EST sequences were searched, but some of the libraries were mixed with barley transcripts and the total number of fungal transcript is unknown. The number of CSEPs in the table indicates how many of the CSEPs we found represented in the different EST projects. However, in many cases there were several hits, thus the absolute number of CSEP ESTs is much larger. The EST library with most CSEP hits is the epidermal EST library made from epidermal cells containing many haustoria but no other fungal material (Godfrey et al 2010). Here we found 151 different CSEPs, but the total number of CSEP ESTs was 1299, which was 20% of the total number of fungal transcripts.

| EST-project/<br>or database         | cDNA source                                             | No. of seq.                                                        | No. of<br>CSEPs | <i>Bgh</i><br>isolate | Reference           |
|-------------------------------------|---------------------------------------------------------|--------------------------------------------------------------------|-----------------|-----------------------|---------------------|
| COGEME<br>(University of<br>Exeter) | Primarily conidia<br>and germinating<br>conidia         | 6944, (3241<br>unisequences)                                       | 38              | C15, mixed            | Thomas et al. 2001  |
| Epidermal-<br>EST-library           | Epidermal cells<br>without epiphytic<br>material, 8 dpi | 9928, (~6512<br>fungal ESTs<br>made into ~3200<br>fungal unigenes) | 151             | A6                    | Godfrey et al. 2010 |
| Conidia                             | Conidia                                                 | 5174                                                               | 25              | DH14                  | Spanu et al. 2010   |
| 20 hpi                              | Germinating<br>conidia 20 hpi                           | 1280                                                               | 22              | DH14                  | Spanu et al. 2010   |
| 3 dpi                               | Epiphytic hyphae<br>3 dpi                               | 4987                                                               | 20              | DH14                  | Spanu et al. 2010   |
| 6 dpi                               | Epiphytic hyphae<br>6 dpi                               | 4873                                                               | 31              | DH14                  | Spanu et al. 2010   |
| Epidermis-<br>mapped                | Epidermal cells<br>without epiphytic<br>material, 7 dpi | 448                                                                | 50              | DH14                  | Spanu et al. 2010   |
| Epidermis<br>non-mapped             | Epidermal cells<br>without epiphytic<br>material, 7 dpi | 1054                                                               | 7               | DH14                  | Spanu et al. 2010   |
| Cleistothecia                       | Cleistothecia 3<br>month after<br>inoculation           | 4438                                                               | 42              | DH14 x<br>CC52        | Spanu et al. 2010   |
| 454-<br>sequencing                  | Epiphytic hyphae<br>5 dpi                               | 12827                                                              | 110             | DH14                  | Spanu et al. 2010   |
