# Supplementary material for: Structure and evolution of barley powdery mildew effector candidates
Source: PubMed Central journal article supplement (PMC3582587; doi:10.1186/1471-2164-13-694), 2012-12-11
Supplement: 1471-2164-13-694-S10.pdf [file 1471-2164-13-694-S10.pdf]

### Additional File 10. CSEP nucleotide diversity within families

The table shows the level of diversity at the nucleotide level in pair-wise comparisons between members of three CSEP families. Diversity is calculated as percentage of different nucleotides for the two exons, the intron and the 500 bp up- and downstream of the coding region. In case there is no homology in parts of the up- and downstream regions only the homologous region is used for the calculation.

| <b>Family 7</b>      | % differences at nucleotide level |         |        |         |                   |
|----------------------|-----------------------------------|---------|--------|---------|-------------------|
| Pair-wise comparison | 500 bp upstream                   | 1. exon | intron | 2. exon | 500 bp downstream |
| CSEP0301 - CSEP0302  | 1,7                               | 0,0     | 1,7    | 1,8     | 0,6               |
| CSEP0301 - CSEP0304  | 10,5                              | 13,7    | 6,8    | 9,5     | 7                 |
| CSEP0301 - CSEP0305  | 12,3                              | 13,7    | 11,9   | 10,7    | 8                 |
| CSEP0301 - CSEP0306  | 12,0                              | 14,3    | 11,9   | 11,2    | 8,2               |
| CSEP0302 - CSEP0304  | 11,2                              | 13,7    | 5,1    | 8,9     | 6,8               |
| CSEP0302 - CSEP0305  | 12,9                              | 13,7    | 10,2   | 11,2    | 8                 |
| CSEP0302 - CSEP0306  | 12,7                              | 14,3    | 10,2   | 11,8    | 8                 |
| CSEP0304 - CSEP0305  | 6,7                               | 1,7     | 5,1    | 7,1     | 6,4               |
| CSEP0304 - CSEP0306  | 7,1                               | 1,7     | 5,1    | 7,7     | 6,4               |
| CSEP0305 - CSEP0306  | 1,3                               | 1,1     | 0,0    | 0,6     | 0,4               |
| Average of all pairs | 8,8                               | 8,8     | 6,8    | 8,0     | 6,0               |
| Length of fragments  | < / = 500                         | 175     | 59     | 169     | < / = 500         |
|                      |                                   |         |        |         |                   |
| <b>Family 8</b>      | % differences at nucleotide level |         |        |         |                   |
| Pair-wise comparison | 500 bp upstream                   | 1. exon | intron | 2. exon | 500 bp downstream |
| CSEP0147 - CSEP0148  | 9,5                               | 21,3    | 7,8    | 25,7    | 11,2              |
| CSEP0147 - CSEP0149  | 10,3                              | 23,4    | 23,5   | 25,7    | 12,7              |
| CSEP0147 - CSEP0150  | 10,2                              | 24,7    | 19,6   | 29,2    | 12,7              |
| CSEP0147 - CSEP0151  | 12,0                              | 25,5    | 17,6   | 31,0    | 11,3              |
| CSEP0148 - CSEP0149  | 9,0                               | 17,4    | 15,7   | 24,8    | 12,0              |
| CSEP0148 - CSEP0150  | 9,6                               | 26,4    | 11,8   | 28,3    | 9,3               |
| CSEP0148 - CSEP0151  | 6,9                               | 24,7    | 9,8    | 30,1    | 11,9              |
| CSEP0149 - CSEP0150  | 1,0                               | 20,9    | 17,6   | 15,0    | 13,3              |
| CSEP0149 - CSEP0151  | 10,7                              | 23,0    | 15,7   | 27,4    | 15,8              |
| CSEP0150 - CSEP0151  | 10,9                              | 26,4    | 15,7   | 32,7    |                   |
| Average of all pairs | 9,0                               | 23,4    | 15,5   | 27,0    | 12,3              |

|                            |                                  |         |        |         |                   |
|----------------------------|----------------------------------|---------|--------|---------|-------------------|
| Length of fragments        | < / = 500                        | 235     | 51     | 113     | < / = 500         |
| <b>Family 30</b>           | % differences at nucleotidelevel |         |        |         |                   |
| Pair-wise comparison       | 500 bp upstream                  | 1. exon | intron | 2. exon | 500 bp downstream |
| <i>CSEP0069 - CSEP0070</i> | 5,6                              | 7,1     | 5,2    | 8,0     | 4,6               |
| <i>CSEP0069 - CSEP0071</i> | 0,8                              | 12,6    | 5,2    | 10,6    | 6,0               |
| <i>CSEP0069 - CSEP0072</i> | 6,4                              | 17,8    | 6,9    | 28,3    | 8,4               |
| <i>CSEP0070 - CSEP0071</i> | 6,0                              | 14,6    | 1,7    | 13,3    | 4,6               |
| <i>CSEP0070 - CSEP0072</i> | 6,8                              | 19,8    | 3,4    | 33,6    | 10,8              |
| <i>CSEP0071 - CSEP0072</i> | 6,8                              | 18,2    | 1,7    | 31,9    | 9,3               |
| Average of all pairs       | 5,4                              | 15,0    | 4,0    | 20,9    | 7,3               |
| Length of fragments        | < / = 500                        | 250     | 58     | 113     | < / = 500         |
