# Supplementary material for: Structure and evolution of barley powdery mildew effector candidates
Source: PubMed Central journal article supplement (PMC3582587; doi:10.1186/1471-2164-13-694), 2012-12-11

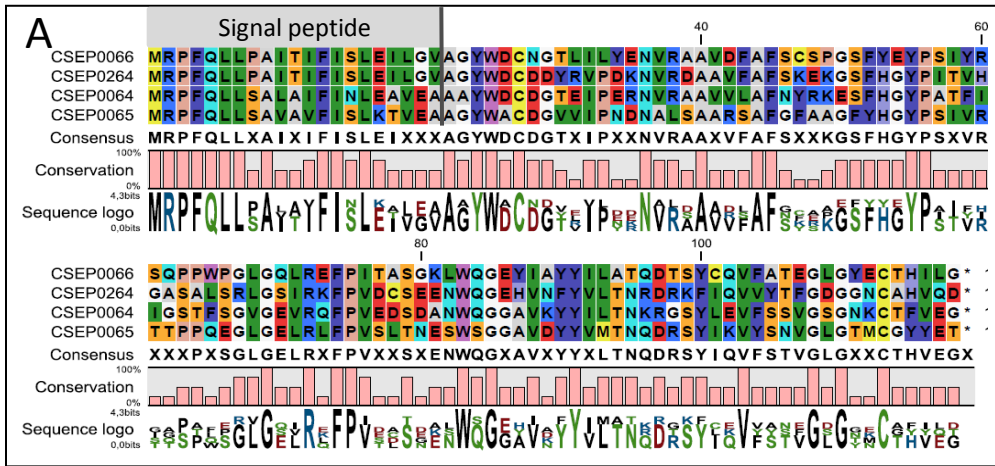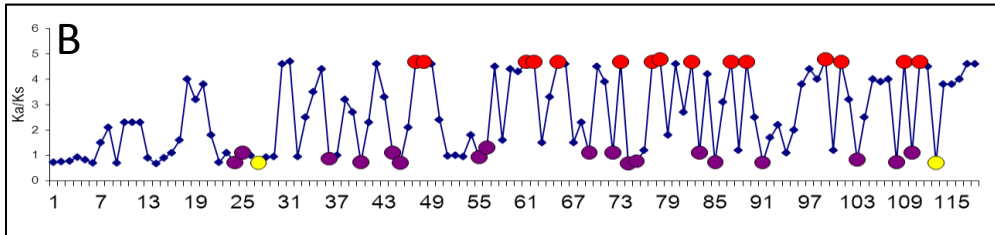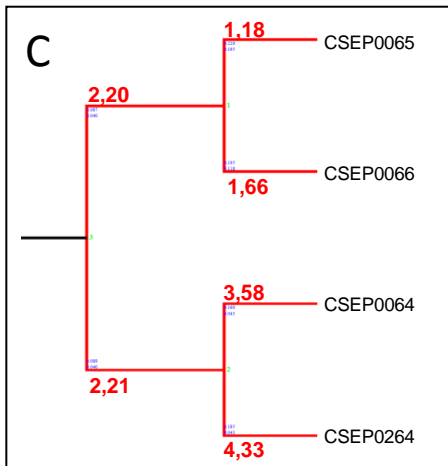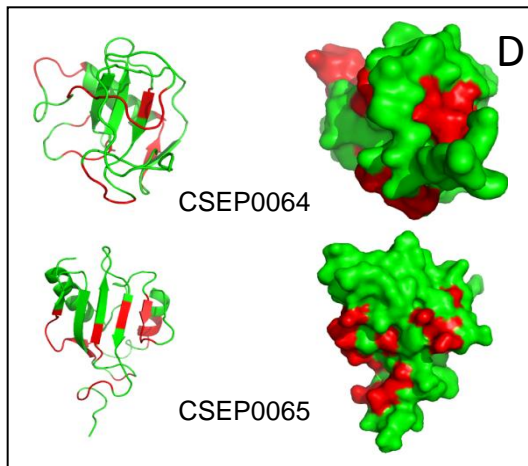

Supplement: 1471-2164-13-694-S11.pdf [file 1471-2164-13-694-S11.pdf]
