# Supplementary material for: Structure and evolution of barley powdery mildew effector candidates
Source: PubMed Central journal article supplement (PMC3582587; doi:10.1186/1471-2164-13-694), 2012-12-11
Supplement: 1471-2164-13-694-S15.pdf [file 1471-2164-13-694-S15.pdf]

### Additional File 15. Summary of data obtained for Blumeria and yeast data sets.

The analysis is based on previously published data (shown in grey) [8] with the new sets and measures added. The highlighted cells indicate the values of interest. The CSEPs, Known\_Fungal\_Effectors and Haustoria\_only sets have the lowest values in terms of: mean lengths, mean proportion disorder, mean maximum length of disorder, mean model quality and mean number of domains. In addition these sets have a higher proportion of top hits to ribonuclease and hydrolase structural templates.

| Data type                                | Data set     |                        |                |                       |                    |                         |              |              |
|------------------------------------------|--------------|------------------------|----------------|-----------------------|--------------------|-------------------------|--------------|--------------|
|                                          | CSEPs        | Known_Fungal_Effectors | Haustoria_only | Hyphae_plus_Haustoria | Hyphae_only_random | Hyphae_only_length_dist | Yeast_random | Yeast_length |
| Mean length                              | 208.762      | <b>156.564</b>         | 236.507        | 422.397               | 407.169            | 237.676                 | 614.578      | 236.521      |
| Mean proportion of disorder              | <b>0.149</b> | 0.177                  | 0.159          | 0.153                 | 0.247              | 0.256                   | 0.283        | 0.248        |
| Mean maximum length of disordered region | 18.324       | <b>14.513</b>          | 36.127         | 31.397                | 54.014             | 35.056                  | 86.239       | 35.211       |
| Mean 3D model quality                    | <b>0.136</b> | 0.152                  | 0.177          | 0.354                 | 0.314              | 0.314                   | 0.190        | 0.274        |
| Mean number of domains                   | 1.546        | <b>1.385</b>           | 1.521          | 2.588                 | 2.451              | 1.563                   | 3.465        | 1.901        |
| Frequency of ribonucleases               | 0.114        | 0.000                  | <b>0.127</b>   | 0.021                 | 0.028              | 0.014                   | 0.056        | 0.028        |
| Number of ribonucleases                  | 56           | 0                      | 9              | 4                     | 2                  | 1                       | 4            | 2            |
| Number of Non ribonucleases              | 435          | 39                     | 62             | 190                   | 69                 | 70                      | 67           | 69           |
| Frequency of hydrolases                  | 0.255        | 0.231                  | <b>0.324</b>   | 0.186                 | 0.113              | 0.141                   | 0.141        | 0.225        |
| Number of hydrolases                     | 125          | 9                      | 23             | 36                    | 8                  | 10                      | 10           | 16           |
| Number of non-hydrolases                 | 366          | 30                     | 48             | 158                   | 63                 | 61                      | 61           | 55           |
| Total number of sequences                | 491          | 39                     | 71             | 194                   | 71                 | 71                      | 71           | 71           |

The lowest values in the first five rows are shown in bold. The highest frequencies of ribonucleases and hydrolases are also shown in bold. Grey cells indicate data reproduced from Bindschedler *et al.* [8].
