# Supplementary material for: Structure and evolution of barley powdery mildew effector candidates
Source: PubMed Central journal article supplement (PMC3582587; doi:10.1186/1471-2164-13-694), 2012-12-11
Supplement: 1471-2164-13-694-S16.pdf [file 1471-2164-13-694-S16.pdf]

**Additional File 16. Calculated p-values for unpaired Wilcoxon signed rank sum tests for the CSEPs set data.**

The table shows the p-values for Wilcoxon signed rank sum significant tests for the CSEPs set versus all other sets according to each data type ( $p < 0.05$ ). These data are very similar to those of *Haustoria\_only*. For example, compared with the *Hyphae\_only* set, all values are significantly lower. When we control for length however, all values are lower except for length and number of domains, as you might expect. There are few significant differences between CSEPs, *Haustoria\_only* and *Known\_Fungal\_Effectors* sets - the p-values suggest that mean global model quality is significantly poorer still.

| Data type                           | Comparison set         |                |                       |                    |                         |                 |                 |
|-------------------------------------|------------------------|----------------|-----------------------|--------------------|-------------------------|-----------------|-----------------|
|                                     | Known_Fungal_Effectors | Haustoria_only | Hyphae_plus_Haustoria | Hyphae_only_random | Hyphae_only_length_dist | Yeast_random    | Yeast_length    |
| Length                              | 0.9941                 | 0.7862         | <b>0.00E+00</b>       | <b>4.47E-09</b>    | 0.7094                  | <b>0.00E+00</b> | 0.7859          |
| Propotion of disorder               | 0.0537                 | 0.5641         | 0.4194                | <b>3.83E-05</b>    | <b>4.41E-07</b>         | <b>1.42E-08</b> | <b>4.31E-08</b> |
| Maximum length of disordered region | 0.7309                 | 0.3795         | <b>1.23E-12</b>       | <b>6.24E-11</b>    | <b>6.77E-08</b>         | <b>0.00E+00</b> | <b>7.79E-08</b> |
| 3D model quality                    | <b>0.0225</b>          | <b>0.0007</b>  | <b>0.00E+00</b>       | <b>9.30E-14</b>    | <b>0.00E+00</b>         | 0.1624          | <b>3.00E-15</b> |
| Number of domains                   | 0.7791                 | 0.8438         | <b>0.00E+00</b>       | <b>1.20E-06</b>    | 0.5899                  | <b>0.00E+00</b> | <b>0.0347</b>   |

The null hypothesis is that the data from each comparison set is equal to or lower in value than that from the CSEPs set. The alternative hypothesis is that the data in the comparison set is greater in value. Statistically significant p-values ( $< 0.05$ ) are shown in bold.
