# Supplementary material for: Structure and evolution of barley powdery mildew effector candidates
Source: PubMed Central journal article supplement (PMC3582587; doi:10.1186/1471-2164-13-694), 2012-12-11
Supplement: 1471-2164-13-694-S17.pdf [file 1471-2164-13-694-S17.pdf]

**Additional File 17. Calculated p-values for Fisher's exact tests for the CSEPs set data compared against data from all other sets.**

The categorical data regarding the proportion of ribonucleases and hydrolases analysed using a Fisher's exact test ( $p < 0.05$ ). ribonucleases are significantly overrepresented in CSEPs compared with all other sets apart from Haustoria\_only and Yeast\_random where there is no measurable difference with this data. Hydrolases are significantly over represented in CSEPs compared with Hyphae\_only\_random, Hyphae\_only\_length\_dist and Yeast\_random, but there is no measurable difference between CSEPs and Haustoria\_only, Known\_Fungal\_Effectors, Hyphae\_plus\_Haustoria and Yeast\_length.

| Key words     | Comparison set         |                |                       |                    |                         |               |               |
|---------------|------------------------|----------------|-----------------------|--------------------|-------------------------|---------------|---------------|
|               | Known_Fungal_Effectors | Haustoria_only | Hyphae_plus_Haustoria | Hyphae_only_random | Hyphae_only_length_dist | Yeast_random  | Yeast_length  |
| Ribonucleases | <b>0.0253</b>          | 0.6949         | <b>3.24E-05</b>       | <b>0.0215</b>      | <b>0.0053</b>           | 0.2143        | <b>0.0215</b> |
| Hydrolases    | 0.8495                 | 0.2484         | 0.0578                | <b>0.0070</b>      | <b>0.0375</b>           | <b>0.0375</b> | 0.6622        |

Statistically significant p-values ( $< 0.05$ ) are shown in bold
