# Supplementary material for: Structure and evolution of barley powdery mildew effector candidates
Source: PubMed Central journal article supplement (PMC3582587; doi:10.1186/1471-2164-13-694), 2012-12-11
Supplement: 1471-2164-13-694-S18.pdf [file 1471-2164-13-694-S18.pdf]

Additional File 18

CSEP0081

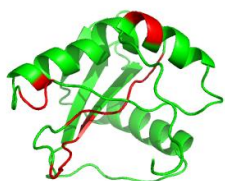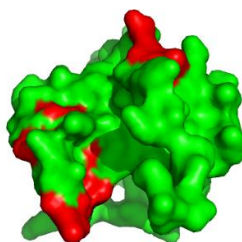

CSEP0090

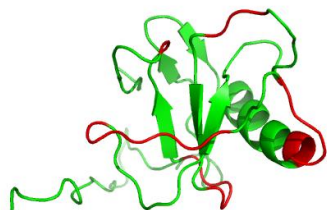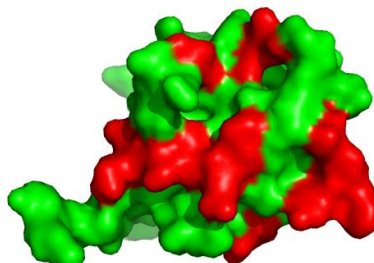

CSEP0091

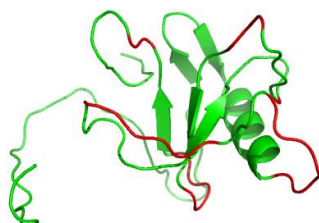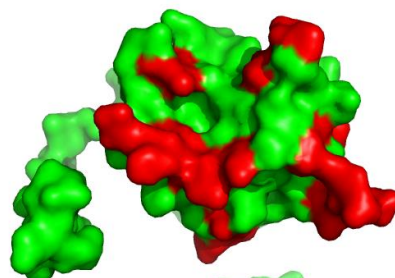

CSEP0092

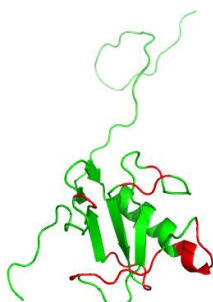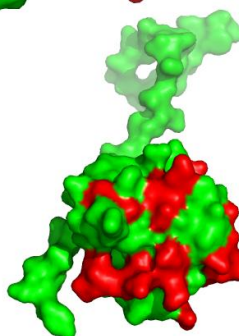

CSEP0093

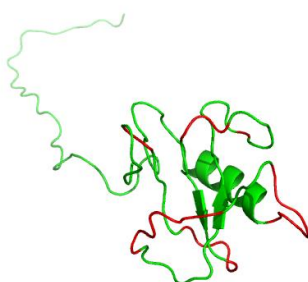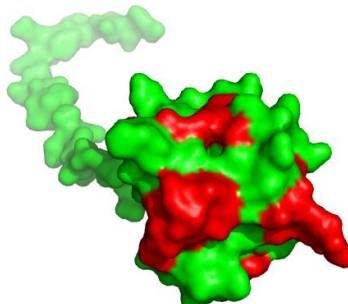

CSEP0197

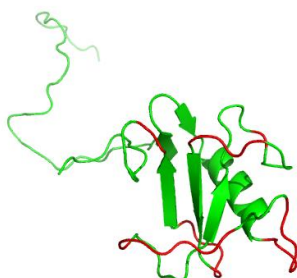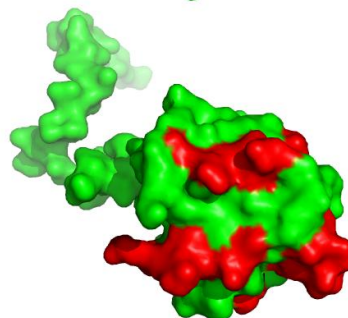

CSEP0137

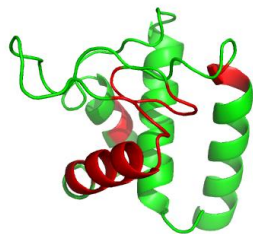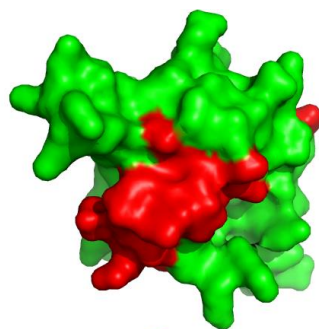

CSEP0146

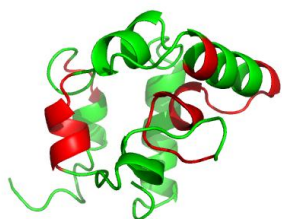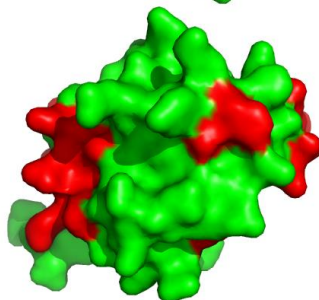

CSEP0180

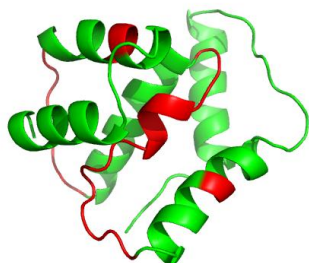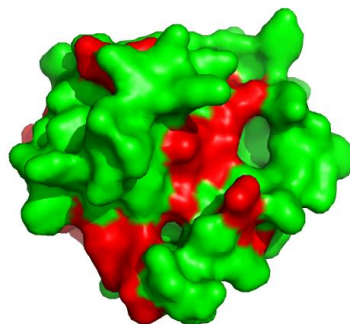

CSEP0181

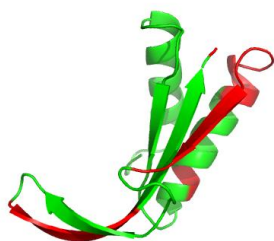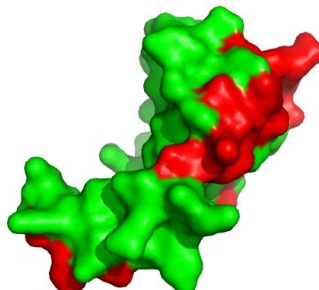

CSEP0267

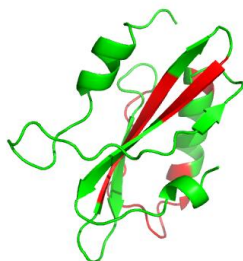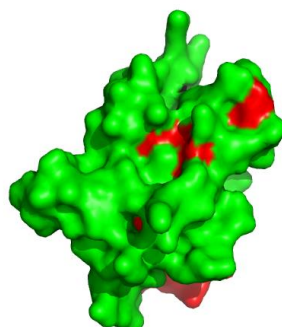

Additional File 18B: Family 21

CSEP0117

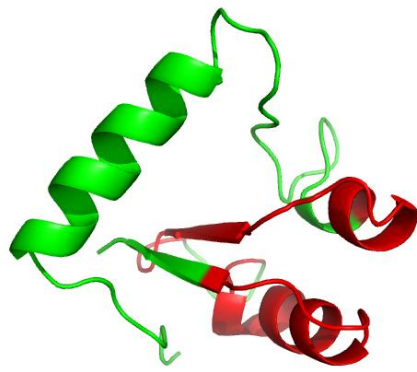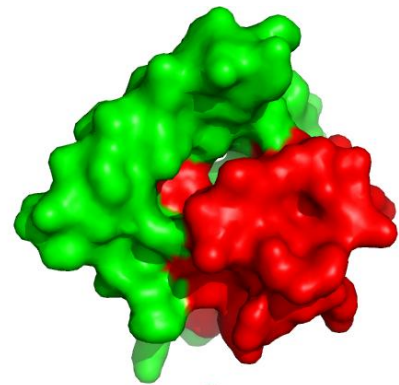

CSEP0114

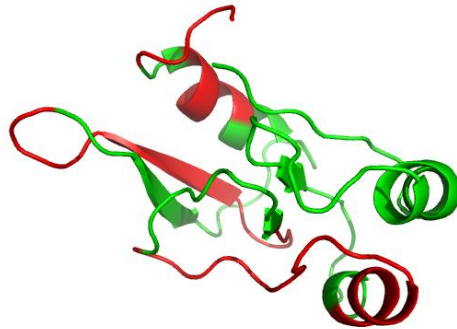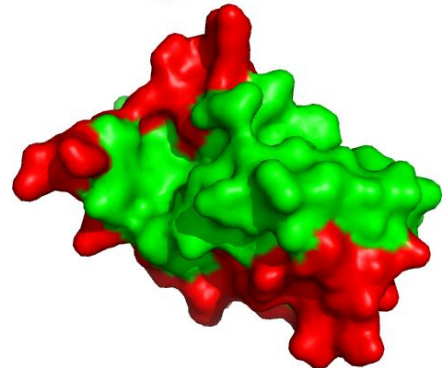

CSEP0113

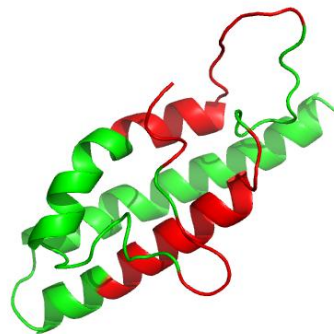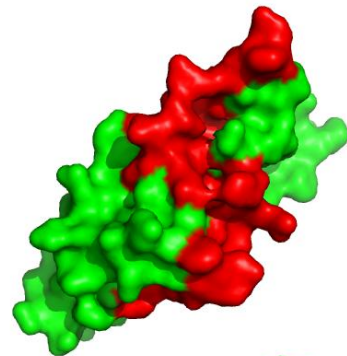

CSEP0099

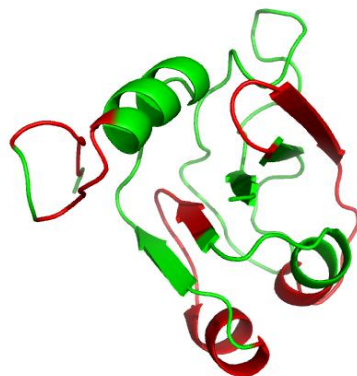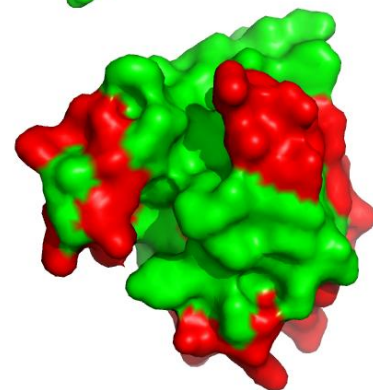

Additional File 18 C: Family 5

CSEP0064

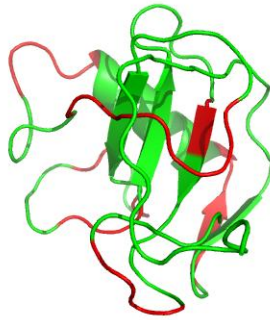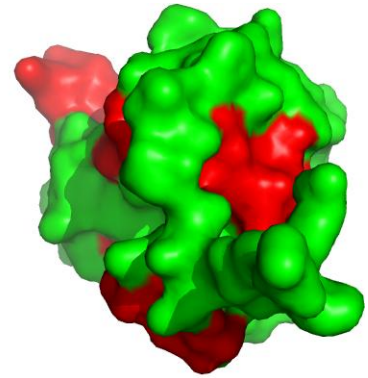

CSEP0065

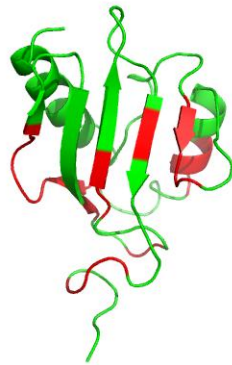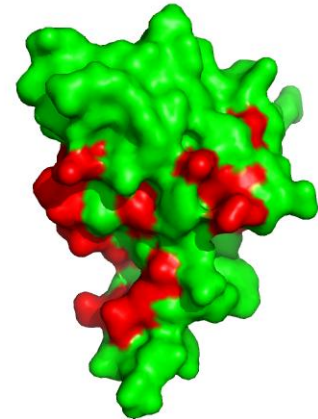

CSEP0066

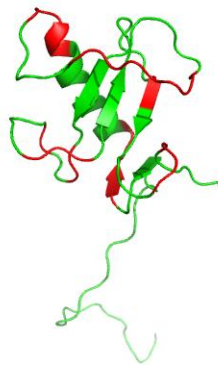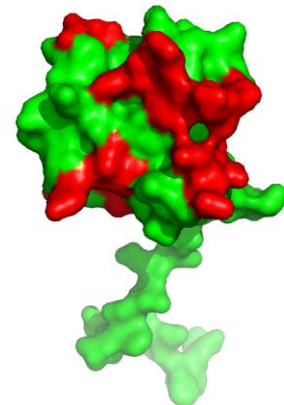

Additional File 18 D: Family 22

CSEP0248

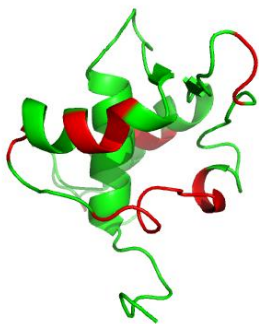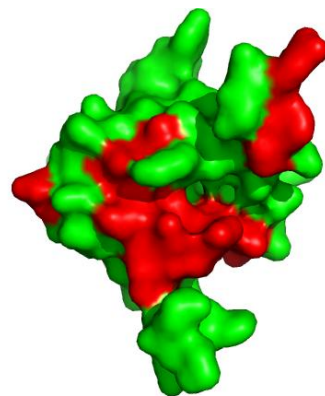

CSEP0249

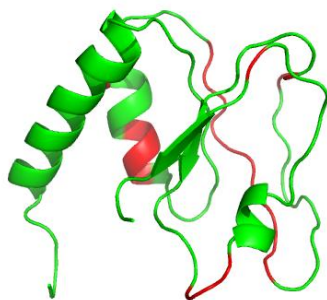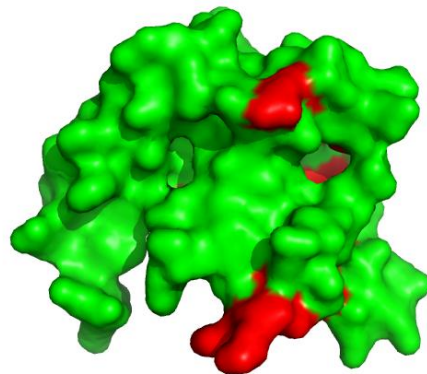

CSEP0363

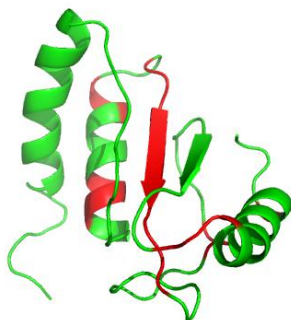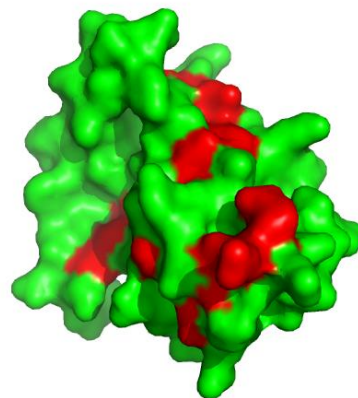

Additional File 18 E: Family 23
