# Supplementary material for: Structure and evolution of barley powdery mildew effector candidates
Source: PubMed Central journal article supplement (PMC3582587; doi:10.1186/1471-2164-13-694), 2012-12-11
Supplement: 1471-2164-13-694-S19.pdf [file 1471-2164-13-694-S19.pdf]

**Additional File 19. CSEP proteins show significant differences in amino acid frequencies and secondary structure (part 1).**The CSEPs set compared with other sets according to: length (as a control), amino acid frequency (A-Y), coiled-coil composition, TM helix composition (as a control), low complexity regions, frequency of helical residues, frequency of strand residues, frequency of loop residues. The Haustoria\_only set is compared with other sets according to: length (as a control), amino acid frequency (A-Y), coiled-coil composition, TM helix composition, low complexity regions, frequency of helical residues, frequency of strand residues, frequency of loop residues. The null hypothesis is that the Haustoria\_set has greater frequencies of that in each column than the set indicated in the row. (Statistically significant p-values (<0.05) are shown in bold, prominent data columns are highlighted grey.)

| Set_name                              | Length | A      | C               | D      | E      | F               | G             | H             | I               | K               | L             | M               | N               | P             |
|---------------------------------------|--------|--------|-----------------|--------|--------|-----------------|---------------|---------------|-----------------|-----------------|---------------|-----------------|-----------------|---------------|
| yeast_length_dist                     | 0.2126 | 0.8993 | <b>4.80E-13</b> | 0.9876 | 1.0000 | <b>3.93E-06</b> | 0.1480        | 0.0834        | <b>0.0113</b>   | 1.0000          | 0.9755        | 0.1571          | 0.9845          | <b>0.0135</b> |
| yeast_sample_dist                     | 1.0000 | 0.2204 | <b>1.50E-14</b> | 0.9904 | 0.9999 | <b>0.0021</b>   | <b>0.0069</b> | 0.2063        | 0.2582          | 0.9999          | 0.9996        | <b>0.0292</b>   | 0.9994          | 0.4100        |
| Hyphae_plus_Haustoria_Ids_length_dist | 0.8020 | 1.0000 | <b>2.29E-13</b> | 0.9907 | 1.0000 | <b>1.63E-09</b> | 1.0000        | <b>0.0004</b> | <b>0.0067</b>   | 0.9966          | 0.2916        | <b>0.0451</b>   | <b>7.30E-06</b> | <b>0.0002</b> |
| Hyphae_plus_Haustoria_sample_dist     | 1.0000 | 1.0000 | <b>0.00E+00</b> | 1.0000 | 1.0000 | <b>4.03E-08</b> | 1.0000        | <b>0.0005</b> | <b>0.0345</b>   | 0.9999          | 0.2982        | <b>0.0308</b>   | <b>6.46E-06</b> | <b>0.0304</b> |
| Hyphae_only_length_dist               | 0.2887 | 1.0000 | <b>9.00E-15</b> | 0.9706 | 1.0000 | <b>0.00E+00</b> | 0.9941        | <b>0.0206</b> | <b>0.0002</b>   | 1.0000          | 0.7203        | 0.3240          | <b>9.38E-06</b> | 0.4788        |
| Hyphae_only_sample_dist               | 1.0000 | 1.0000 | <b>2.00E-15</b> | 0.9928 | 1.0000 | <b>9.77E-13</b> | 0.9999        | <b>0.0023</b> | <b>0.0430</b>   | 0.9668          | 0.9296        | 0.3071          | <b>0.0001</b>   | 0.8516        |
| proteome_minus_CSEPs                  | 1.0000 | 1.0000 | <b>0.00E+00</b> | 0.9946 | 1.0000 | <b>0.00E+00</b> | 0.9686        | <b>0.0173</b> | <b>2.00E-15</b> | 0.7822          | 1.0000        | <b>3.51E-09</b> | <b>0.00E+00</b> | 1.0000        |
| Known_Fungal_Effectors                | 0.0059 | 1.0000 | 0.9977          | 0.8989 | 0.5093 | <b>0.0001</b>   | 1.0000        | 0.8504        | <b>0.0001</b>   | <b>0.0344</b>   | <b>0.0001</b> | <b>0.0004</b>   | 0.3445          | 0.9307        |
| Haustoria_only                        | 0.2126 | 0.9997 | 0.8557          | 0.9935 | 0.6228 | <b>0.0386</b>   | 0.9903        | <b>0.0107</b> | <b>0.0042</b>   | <b>1.13E-06</b> | <b>0.0001</b> | <b>0.0011</b>   | 0.5128          | <b>0.0390</b> |

**Additional File 20** continued

| Set_name                              | Q      | R             | S               | T      | V             | W             | Y               | Coiled coils  | TM     | Low Complexity | Helix  | Strand          | Loops           |
|---------------------------------------|--------|---------------|-----------------|--------|---------------|---------------|-----------------|---------------|--------|----------------|--------|-----------------|-----------------|
| yeast_length_dist                     | 0.7498 | <b>0.0103</b> | <b>1.21E-05</b> | 0.3056 | 0.8964        | 0.0525        | <b>1.19E-08</b> | 0.1014        | 1.0000 | 0.9977         | 0.7387 | 1.0000          | <b>6.76E-06</b> |
| yeast_sample_dist                     | 0.9803 | <b>0.0331</b> | <b>0.0527</b>   | 0.7463 | 0.1979        | 0.2988        | <b>4.47E-07</b> | 0.9801        | 1.0000 | 1.0000         | 1.0000 | 0.9791          | <b>8.51E-07</b> |
| Hyphae_plus_Haustoria_Ids_length_dist | 0.7899 | 0.4826        | <b>0.0454</b>   | 0.0877 | 0.9995        | <b>0.0122</b> | <b>2.32E-08</b> | <b>0.0124</b> | 0.9993 | 0.8447         | 0.3309 | <b>0.00E+00</b> | <b>0.00E+00</b> |
| Hyphae_plus_Haustoria_sample_dist     | 0.1539 | <b>0.0045</b> | <b>0.0001</b>   | 0.3244 | 0.9999        | 0.2614        | <b>2.21E-13</b> | <b>0.0376</b> | 0.9880 | 0.6133         | 0.9826 | <b>0.00E+00</b> | <b>0.00E+00</b> |
| Hyphae_only_length_dist               | 0.6718 | 0.9295        | <b>0.0019</b>   | 0.6692 | 0.9797        | 0.2095        | <b>0.00E+00</b> | <b>0.0423</b> | 1.0000 | 0.8440         | 0.7483 | 0.9978          | <b>0.0081</b>   |
| Hyphae_only_sample_dist               | 0.9950 | 0.9830        | <b>0.0113</b>   | 0.3201 | 0.7909        | <b>0.0186</b> | <b>0.00E+00</b> | 0.1044        | 1.0000 | 0.3216         | 0.7320 | 1.0000          | <b>7.79E-07</b> |
| proteome_minus_CSEPs                  | 1.0000 | 1.0000        | 0.9402          | 0.9924 | <b>0.0024</b> | 0.9999        | <b>0.00E+00</b> | 0.9935        | 1.0000 | 0.9872         | -      | -               | -               |
| Known_Fungal_Effectors                | 0.1348 | 0.2735        | <b>0.0009</b>   | 0.8450 | 0.1918        | 0.9930        | <b>0.0138</b>   | 0.9996        | 1.0000 | 1.0000         | 1.0000 | 0.2268          | 0.5447          |
| Haustoria_only                        | 0.9983 | <b>0.0410</b> | 0.3943          | 0.9998 | 0.9975        | 0.9875        | 0.5616          | 0.1009        | 0.2967 | 0.6253         | 0.8842 | 0.6896          | 0.8827          |
