# Supplementary material for: Structure and evolution of barley powdery mildew effector candidates
Source: PubMed Central journal article supplement (PMC3582587; doi:10.1186/1471-2164-13-694), 2012-12-11
Supplement: 1471-2164-13-694-S20.pdf [file 1471-2164-13-694-S20.pdf]

**Additional File 20. CSEP proteins show significant differences in amino acid frequencies and secondary structure (part 2).** The CSEPs set compared with other sets according to: length (as a control), amino acid frequency (A-Y), coiled-coil composition, TM helix composition, low complexity regions, frequency of helical residues, frequency of strand residues, frequency of loop residues. The table contains the same information as Additional File 20 but with the reverse null hypothesis (or 1-p).

| Set_name                             | Length          | A               | C             | D               | E               | F      | G               | H      | I      | K               | L               | M      | N      | P               |
|--------------------------------------|-----------------|-----------------|---------------|-----------------|-----------------|--------|-----------------|--------|--------|-----------------|-----------------|--------|--------|-----------------|
| yeast_length_dist                    | 0.7874          | 0.1007          | 1.0000        | <b>0.0124</b>   | <b>2.41E-05</b> | 1.0000 | 0.8520          | 0.9166 | 0.9887 | <b>1.00E-09</b> | <b>0.0245</b>   | 0.8429 | 0.0155 | 0.9865          |
| yeast_sample_dist                    | <b>0.00E+00</b> | 0.7796          | 1.0000        | <b>0.0096</b>   | <b>0.0001</b>   | 0.9979 | 0.9931          | 0.7937 | 0.7418 | <b>0.0001</b>   | <b>0.0004</b>   | 0.9708 | 0.0006 | 0.5900          |
| Hyphae_plus_Haustoria_Ds_length_dist | 0.1980          | <b>0.00E+00</b> | 1.0000        | <b>0.0093</b>   | <b>1.00E-10</b> | 1.0000 | <b>2.60E-05</b> | 0.9996 | 0.9933 | <b>0.0034</b>   | 0.7084          | 0.9549 | 1.0000 | 0.9998          |
| Hyphae_plus_Haustoria_sample_dist    | <b>0.00E+00</b> | <b>0.00E+00</b> | 1.0000        | <b>1.83E-05</b> | <b>0.00E+00</b> | 1.0000 | <b>4.00E-10</b> | 0.9995 | 0.9655 | <b>0.0001</b>   | 0.7018          | 0.9692 | 1.0000 | 0.9696          |
| Hyphae_only_length_dist              | 0.7113          | <b>6.70E-09</b> | 1.0000        | <b>0.0294</b>   | <b>1.23E-06</b> | 1.0000 | <b>0.0059</b>   | 0.9794 | 0.9998 | <b>5.33E-06</b> | 0.2797          | 0.6760 | 1.0000 | 0.5212          |
| Hyphae_only_sample_dist              | <b>4.30E-09</b> | <b>1.48E-08</b> | 1.0000        | <b>0.0072</b>   | <b>0.00E+00</b> | 1.0000 | <b>0.0001</b>   | 0.9977 | 0.9570 | <b>0.0332</b>   | 0.0704          | 0.6929 | 0.9999 | 0.1484          |
| proteome_minus_CSEPs                 | <b>0.00E+00</b> | <b>0.00E+00</b> | 1.0000        | <b>0.0054</b>   | <b>0.00E+00</b> | 1.0000 | <b>0.0314</b>   | 0.9827 | 1.0000 | 0.2178          | <b>9.10E-08</b> | 1.0000 | 1.0000 | <b>0.00E+00</b> |
| Known_Fungal_Effectors               | 0.9941          | <b>2.70E-06</b> | <b>0.0023</b> | 0.1011          | 0.4907          | 0.9999 | <b>2.75E-05</b> | 0.1496 | 0.9999 | 0.9656          | 0.9999          | 0.9996 | 0.6555 | 0.0693          |
| Haustoria_only                       | 0.7874          | <b>0.0003</b>   | 0.1443        | <b>0.0065</b>   | 0.3772          | 0.9614 | <b>0.0097</b>   | 0.9893 | 0.9958 | 1.0000          | 0.9999          | 0.9989 | 0.4872 | 0.9610          |

**Additional File 22.** continued

| Set_name                              | Q               | R               | S      | T             | V             | W             | Y      | Coiled coils  | TM              | Low Complexity  | Helix           | Strand          | Loops  |
|---------------------------------------|-----------------|-----------------|--------|---------------|---------------|---------------|--------|---------------|-----------------|-----------------|-----------------|-----------------|--------|
| yeast_length_dist                     | 0.2502          | 0.9897          | 1.0000 | 0.6944        | 0.1036        | 0.9475        | 1.0000 | 0.8986        | <b>1.16E-06</b> | <b>0.0023</b>   | 0.2613          | <b>5.61E-07</b> | 1.0000 |
| yeast_sample_dist                     | <b>0.0197</b>   | 0.9669          | 0.9473 | 0.2537        | 0.8021        | 0.7012        | 1.0000 | <b>0.0199</b> | <b>0.00E+00</b> | <b>6.52E-08</b> | <b>1.55E-07</b> | <b>0.0209</b>   | 1.0000 |
| Hyphae_plus_Haustoria_Ids_length_dist | 0.2101          | 0.5174          | 0.9546 | 0.9123        | <b>0.0005</b> | 0.9878        | 1.0000 | 0.9876        | <b>0.0007</b>   | 0.1553          | 0.6691          | 1.0000          | 1.0000 |
| Hyphae_plus_Haustoria_sample_dist     | 0.8461          | 0.9955          | 0.9999 | 0.6756        | <b>0.0001</b> | 0.7386        | 1.0000 | 0.9624        | <b>0.0120</b>   | 0.3867          | <b>0.0174</b>   | 1.0000          | 1.0000 |
| Hyphae_only_length_dist               | 0.3282          | 0.0705          | 0.9981 | 0.3308        | <b>0.0203</b> | 0.7905        | 1.0000 | 0.9577        | <b>1.40E-09</b> | 0.1560          | 0.2517          | <b>0.0022</b>   | 0.9919 |
| Hyphae_only_sample_dist               | <b>0.0050</b>   | <b>0.0170</b>   | 0.9887 | 0.6799        | 0.2091        | 0.9814        | 1.0000 | 0.8956        | <b>3.06E-05</b> | 0.6784          | 0.2680          | <b>5.89E-06</b> | 1.0000 |
| proteome_minus_CSEPs                  | <b>3.49E-07</b> | <b>0.00E+00</b> | 0.0598 | <b>0.0076</b> | 0.9976        | <b>0.0001</b> | 1.0000 | <b>0.0065</b> | <b>9.00E-10</b> | <b>0.0128</b>   | -               | -               | -      |
| Known_Fungal_Effectors                | 0.8652          | 0.7265          | 0.9991 | 0.1550        | 0.8082        | <b>0.0070</b> | 0.9862 | <b>0.0004</b> | <b>0.00E+00</b> | <b>3.90E-09</b> | <b>1.83E-08</b> | 0.7732          | 0.4553 |
| Haustoria_only                        | <b>0.0017</b>   | 0.9590          | 0.6057 | <b>0.0002</b> | <b>0.0025</b> | <b>0.0125</b> | 0.4384 | 0.8991        | 0.7033          | 0.3747          | 0.1158          | 0.3104          | 0.1173 |
