# Supplementary material for: Structure and evolution of barley powdery mildew effector candidates
Source: PubMed Central journal article supplement (PMC3582587; doi:10.1186/1471-2164-13-694), 2012-12-11
Supplement: 1471-2164-13-694-S23.pdf [file 1471-2164-13-694-S23.pdf]

**Additional File 23.** Clustering of *CSEPs* on sequence scaffolds. The table shows for each of the studied families how many members there are clustered and the length of the scaffold-region containing the members. The scaffold length includes both the sum of sequences contigs and the calculated distances between the contigs. The average distance is the distance between two *CSEPs* on the scaffold if they were distributed evenly.

| Family | Members | Clustered | Clustered within (kb) | Average distance (kb) | Closest pair (kb)                              |
|--------|---------|-----------|-----------------------|-----------------------|------------------------------------------------|
| 1      | 59      | 3         | 1882                  | 941                   | <i>CSEP0312</i> and <i>CSEP0313</i> : ~ 44 kb  |
| 1      | 59      | 2         | 326                   | 326                   | <i>CSEP0330</i> and <i>CSEP0222</i> : ~ 326 kb |
| 1      | 59      | 5         | 3954                  | 989                   | <i>CSEP0336</i> and <i>CSEP0337</i> : ~ 90 kb  |
| 1      | 59      | 2         | 86                    | 86                    | <i>CSEP0345</i> and <i>CSEP0346</i> : ~ 86 kb  |
| 1      | 59      | 2         | 80                    | 80                    | <i>CSEP0349</i> and <i>CSEP0351</i> : ~ 80 kb  |
| 1      | 59      | 4         | 1288                  | 429                   | <i>CSEP0404</i> and <i>CSEP0405</i> : ~ 5 kb   |
| 1      | 59      | 7         | 655                   | 109                   | <i>CSEP0413</i> and <i>CSEP0414</i> : ~ 13 kb  |
| 1      | 59      | 7         | 1028                  | 171                   | <i>CSEP0423</i> and <i>CSEP0424</i> : ~ 4 kb   |
| 1      | 59      | 2         | 8                     | 8                     | <i>CSEP0079</i> and <i>CSEP0215</i> : ~ 8 kb   |
| 1      | 59      | 5         | 213                   | 53                    | <i>CSEP0450</i> and <i>CSEP0013</i> : ~ 19 kb  |
| 1      | 59      | 7         | 209                   | 35                    | <i>CSEP0456</i> and <i>CSEP0457</i> : ~ 11 kb  |
| 1      | 59      | 2         | 10                    | 10                    | <i>CSEP0478</i> and <i>CSEP0479</i> : ~ 10 kb  |
| 2      | 32      | 18        | 1429                  | 84                    | <i>CSEP0011</i> and <i>CSEP0021</i> : ~16 kb   |
| 2      | 32      | 3         | 217                   | 109                   | <i>CSEP0375</i> and <i>CSEP0376</i> : ~22 kb   |
| 2      | 32      | 2         | 40                    | 40                    | <i>CSEP0245</i> and <i>CSEP0246</i> : ~40 kb   |
| 3      | 20      | 7         | 365                   | 61                    | <i>CSEP0217</i> and <i>CSEP0218</i> : ~10 kb   |
| 3      | 20      | 6         | 324                   | 65                    | <i>CSEP0158</i> and <i>CSEP0461</i> : ~22 kb   |
| 3      | 20      | 4         | 133                   | 44                    | <i>CSEP0236</i> and <i>CSEP0391</i> : ~12 kb   |
| 4      | 19      | 8         | 420                   | 60                    | <i>CSEP0089</i> and <i>CSEP0153</i> : ~5 kb    |
| 4      | 19      | 5         | 217                   | 54                    | <i>CSEP0164</i> and <i>CSEP0166</i> : ~33 kb   |
| 4      | 19      | 4         | 143                   | 48                    | <i>CSEP0036</i> and <i>CSEP0171</i> : ~44 kb   |
| 5      | 15      | 4         | 327                   | 109                   | <i>CSEP0113</i> and <i>CSEP0442</i> : ~3 kb    |
| 5      | 15      | 3         | 40                    | 20                    | <i>CSEP0114</i> and <i>CSEP0115</i> : ~6 kb    |
| 5      | 15      | 2         | 42                    | 42                    | <i>CSEP0339</i> and <i>CSEP0112</i> : ~42 kb   |
| 5      | 15      | 2         | 4                     | 4                     | <i>CSEP0117</i> and <i>CSEP0170</i> : ~4 kb    |
| 5      | 15      | 2         | 83                    | 83                    | <i>CSEP0099</i> and <i>CSEP0393</i> : ~83 kb   |
| 6      | 10      | 10        | 534                   | 59                    | <i>CSEP0015</i> and <i>CSEP0467</i> : ~3 kb    |
| 7      | 10      | 2         | 107                   | 107                   | <i>CSEP0279</i> and <i>CSEP0280</i> : ~107 kb  |
| 7      | 10      | 6         | 344                   | 69                    | <i>CSEP0305</i> and <i>CSEP0306</i> : ~25 kb   |
| 8      | 8       | 5         | 744                   | 186                   | <i>CSEP0149</i> and <i>CSEP0150</i> : ~82 kb   |
| 8      | 8       | 3         | 65                    | 33                    | <i>CSEP0058</i> and <i>CSEP0333</i> : ~16 kb   |
| 9      | 7       | 6         | 1233                  | 247                   | <i>CSEP0291</i> and <i>CSEP0292</i> : ~4 kb    |

|          |   |   |     |     |                                               |
|----------|---|---|-----|-----|-----------------------------------------------|
| 10       | 7 | 6 | 943 | 189 | <i>CSEP0032</i> and <i>CSEP0269</i> : ~25 kb  |
| 11       | 7 | 6 | 660 | 132 | <i>CSEP0240</i> and <i>CSEP0160</i> : ~45 kb  |
| 12       | 7 | 4 | 244 | 81  | <i>CSEP0093</i> and <i>CSEP0094</i> : ~6 kb   |
| 12       | 7 | 3 | 180 | 90  | <i>CSEP0090</i> and <i>CSEP0091</i> : ~116 kb |
| 13       | 7 | 5 | 225 | 56  | <i>CSEP0025</i> and <i>CSEP0069</i> : ~3 kb   |
| 14       | 7 | 2 | 210 | 210 | <i>CSEP0364</i> and <i>CSEP0365</i> : ~210 kb |
| 15       | 7 | 3 | 9   | 5   | <i>CSEP0416</i> and <i>CSEP0417</i> : ~2,5 kb |
| 16       | 6 | 5 | 170 | 43  | <i>CSEP0128</i> and <i>CSEP0344</i> : 2,5 kb  |
| 23       | 5 | 3 | 169 | 85  | <i>CSEP0248</i> and <i>CSEP0363</i> : ~29 kb  |
| 25       | 4 | 4 | 127 | 42  | <i>CSEP0005</i> and <i>CSEP0012</i> : ~6 kb   |
| 30       | 4 | 4 | 446 | 149 | <i>CSEP0069</i> and <i>CSEP0070</i> : ~98 kb  |
| 32       | 4 | 2 | 31  | 31  | <i>CSEP0107</i> and <i>CSEP0108</i> : ~31 kb  |
| 32       | 4 | 2 | 54  | 54  | <i>CSEP0106</i> and <i>CSEP0109</i> : ~54 kb  |
| 33       | 4 | 4 | 268 | 89  | <i>CSEP0265</i> and <i>CSEP0436</i> : ~36 kb  |
| 52       | 3 | 3 | 120 | 60  | <i>CSEP0255</i> and <i>CSEP0296</i> : ~41 kb  |
| Average: |   |   | 434 | 129 |                                               |
